# Supplementary material for: Effects on renal outcome of concomitant acute pyelonephritis, acute kidney injury and obstruction duration in obstructive uropathy by urolithiasis: a retrospective cohort study
Source: PubMed Central journal article supplement — BMJ Open. 2019 Nov 3;9(11):e030438. doi: 10.1136/bmjopen-2019-030438 (PMC6858199; doi:10.1136/bmjopen-2019-030438), 2019-11-03
Supplement: bmjopen-2019-030438.draft_revisions.pdf [file bmjopen-2019-030438.draft_revisions.pdf]

# BMJ Open

BMJ Open is committed to open peer review. As part of this commitment we make the peer review history of every article we publish publicly available.

When an article is published we post the peer reviewers' comments and the authors' responses online. We also post the versions of the paper that were used during peer review. These are the versions that the peer review comments apply to.

The versions of the paper that follow are the versions that were submitted during the peer review process. They are not the versions of record or the final published versions. They should not be cited or distributed as the published version of this manuscript.

BMJ Open is an open access journal and the full, final, typeset and author-corrected version of record of the manuscript is available on our site with no access controls, subscription charges or pay-per-view fees (<http://bmjopen.bmj.com>).

If you have any questions on BMJ Open's open peer review process please email [info.bmjopen@bmj.com](mailto:info.bmjopen@bmj.com)

# BMJ Open

## Concomitant Acute Pyelonephritis, Acute Kidney Injury, and Obstruction Duration Affects Renal Outcome in Obstructive Uropathy by Urolithiasis

|                               |                                                                                                                                                                                                                                                                                                                                                                                                  |
|-------------------------------|--------------------------------------------------------------------------------------------------------------------------------------------------------------------------------------------------------------------------------------------------------------------------------------------------------------------------------------------------------------------------------------------------|
| Journal:                      | <i>BMJ Open</i>                                                                                                                                                                                                                                                                                                                                                                                  |
| Manuscript ID                 | bmjopen-2019-030438                                                                                                                                                                                                                                                                                                                                                                              |
| Article Type:                 | Research                                                                                                                                                                                                                                                                                                                                                                                         |
| Date Submitted by the Author: | 15-Mar-2019                                                                                                                                                                                                                                                                                                                                                                                      |
| Complete List of Authors:     | Lee, Eung Hyun; Chung-Ang University Hospital, Internal Medicine<br>Kim, Su-Hyun; Chung-Ang University Hospital, Internal Medicine<br>Shin, Jung-ho; Chung-Ang University Hospital, Internal Medicine<br>Park, Sung Bin; Chung-Ang University Hospital, Radiology<br>Chi, Byung Hoon ; Chung-Ang University Hospital, Urology<br>Hwang, Jin Ho; Chung-Ang University Hospital, Internal Medicine |
| Keywords:                     | acute pyelonephritis, Chronic renal failure < NEPHROLOGY, Acute renal failure < NEPHROLOGY, nephrolithiasis, Urolithiasis < UROLOGY, obstructive uropathy                                                                                                                                                                                                                                        |
|                               |                                                                                                                                                                                                                                                                                                                                                                                                  |

SCHOLARONE™  
Manuscripts

**Title Page**

Concomitant Acute Pyelonephritis, Acute Kidney Injury, and Obstruction Duration Affects  
Renal Outcome in Obstructive Uropathy by Urolithiasis

**Authors**

Eung Hyun Lee,<sup>1</sup> Su-Hyun Kim,<sup>1</sup> Jung-ho Shin,<sup>1</sup> Sung Bin Park,<sup>2</sup> Byung Hoon Chi,<sup>3</sup> Jin Ho  
Hwang,<sup>1,\*</sup>

**Affiliations**

<sup>1</sup>Department of Internal Medicine, Chung-Ang University Hospital, Seoul, Korea

<sup>2</sup>Department of Radiology, Chung-Ang University Hospital, Seoul, Korea

<sup>3</sup>Department of Urology, Chung-Ang University Hospital, Seoul, Korea

**Total Number of Tables: 5, Figures: 4**

**Word count: 3162**

**\*Addresses for Correspondence:**

Jin Ho Hwang, MD, PhD

Clinical Assistant Professor

Division of Nephrology, Department of Internal Medicine

Chung-Ang University Hospital

102 Heukseok-ro, Dongjak-gu, Seoul 06973, Republic of Korea

Tel. +82-2-6299-1447, Fax. +82-2-6299-2064

E-mail: dennyjinho@gmail.com

## Abstract

**Objective:** Urolithiasis-related obstructive uropathy is becoming one of the leading causes of chronic kidney disease, which is commonly encountered in the clinical field. Obstruction release from urolithiasis can be delayed, with a lack of suggested time for preventing the deterioration of renal function.

**Design:** Retrospective cohort study

**Setting & Participants:** 1607 patients from a urolithiasis-related obstructive uropathy cohort of 2314, between January 2005 and December 2015.

**Outcome measures:** eGFR decrease  $\geq 30\%$  and/or end-stage renal disease (ESRD), and eGFR decrease  $\geq 50\%$  and/or ESRD according to obstruction duration, acute kidney injury (AKI), and acute pyelonephritis (APN) accompanied by obstructive uropathy.

**Results:** When the prognosis was divided by the obstruction duration quartile, the longer the obstruction duration, the higher the probability of eGFR reduction  $>50\%$  ( $p=0.02$ ). In patients with concomitant APN or severe AKI during hospitalization with obstructive uropathy, an eGFR decrease of  $>30\%$  and  $>50\%$  occurred more frequently, compared to the others ( $p<0.001$ ). When we adjusted for sex, age, HT, DM, APN, AKI grades, and obstruction release  $>7$  days for multivariate analysis, we found that concomitant APN (HR 3.495, 95% CI 1.942–6.289;  $p<0.001$ ), concomitant AKI (HR 3.284, 95% CI 1.354–7.965,  $p=0.009$  for AKI stage II; HR 6.425, 95% CI 2.599–15.881,  $p<0.001$  for AKI stage III) and an obstruction duration  $>7$  days (HR 1.854, 95% CI 1.095–3.140,  $p=0.001$ ) were independently associated with an eGFR decrease  $>50\%$ . Tree analysis also showed that AKI grade 3, APN, and an obstruction duration  $>7$  days were the most important factors affecting the renal outcome.

**Conclusions:** In urolithiasis-related obstructive uropathy patients, concomitant APN was strongly associated with the deterioration of renal function after obstruction release. The elapsed time to release the obstruction also affected renal function.

### Strengths and limitations of this study

- Our study firstly investigated the association between the obstruction duration and the renal outcome in urolithiasis-related obstructive uropathy.
- The longer the obstruction duration, the higher the probability of eGFR reduction > 50%
- Concomitant APN and AKI were strongly associated with the deterioration of renal function after obstruction release.
- The results cannot prove a causal relationship and the retrospective aspect of this study may introduce selection bias and mis-classification.

**Keywords:** acute kidney injury; acute pyelonephritis; chronic kidney disease; kidney stone; nephrolithiasis; obstructive uropathy; prognosis; renal outcome; urinary tract obstruction; urolithiasis

## Introduction

Urolithiasis-related obstructive uropathy is increasingly becoming one of the leading causes of chronic kidney disease (CKD), which is commonly encountered in the clinical field.<sup>1 2</sup> It occurs worldwide, but the incidence and prevalence can vary widely from country to country.<sup>2-7</sup> The differences are generally known to be affected by sex, age, regional characteristics (diet habit and environment), race, amount of water intake, obesity and other comorbidities.<sup>8-10</sup>

Urolithiasis is a cause of various discomforting symptoms, such as severe pain, hematuria, or lower urinary tract symptoms that worsen quality of life. In addition, it is associated with socioeconomic losses in various aspects as it often requires invasive treatment, such as intervention or surgery to remove stones, leading to the hospitalization of an economically active age population. Patients with urolithiasis commonly experience recurrent episodes of ureteral obstruction, or concomitant metabolic disorders such as hyperuricemia, diabetes mellitus or dyslipidemia.<sup>11</sup> Also, if obstructive uropathy by urolithiasis causes additional complications such as acute kidney injury (AKI) or infection, socioeconomic burden is further increased due to a longer hospital stay and CKD progression.<sup>12-15</sup> The incidence of acute renal injury due to renal stones has been reported to be 0.72–9.7%. Stone removal improves occlusion and restores renal function.<sup>16</sup> Therefore, early obstruction release is thought to have an important effect on prognosis, by preventing infections and renal dysfunction. However, obstruction release from urolithiasis can be easily delayed for various reasons in clinical practice, with a lack of suggested golden time for preventing the deterioration of renal function.

The purpose of this study was to investigate the effect of obstruction duration itself, due to urolithiasis, and the effect of concomitant AKI or acute pyelonephritis (APN) during the obstruction on the prognosis of renal function.

## Materials and Methods

### *Study Design and Patients*

A total of 2314 patients were screened and admitted to Chung-Ang University Hospital with urolithiasis (table S1) from January 2005 to December 2015. Of these patients, 1607 were eligible for analysis, excluding 707. All patients were at least of 15 years of age, were admitted to the hospital because of obstructive uropathy due to urolithiasis, and were able to estimate the date of occurrence of the obstruction as the symptom date was recorded. Basic clinical parameters were collected, such as age at the time of admission, sex, underlying comorbidities (hypertension [HT], diabetes mellitus [DM], and alleged CKD), information about the laboratory findings (at the time of admission, peak c-reactive protein [CRP], the highest serum creatinine and the lowest estimated glomerular filtration rate [eGFR]), information about the urolithiasis (performed radiologic modality for diagnosis, obstruction site, obstruction side, selected procedure to release obstructive uropathy, stone size, and grade of hydronephrosis), the use of pain killers, and the outcome profiles (follow-up eGFR). This study was approved by the institutional review board (IRB number: 1810-008-16212) and the need for informed consent was waived as this study used a retrospective design. All clinical investigations were conducted in accordance with the guidelines of the 2013 Declaration of Helsinki.

### **Measurement and definition of parameters**

Obstruction duration was calculated as the difference between the documented symptom onset date and the date on which the obstruction was directly resolved by procedure, or from the date on which the pain was markedly improved, in the spontaneous release patients.

Concomitant APN was defined as the presence of APN diagnosis in the medical records or the use of antibiotics for urinary tract infection treatment for more than 7 days, in

1  
2  
3 patients with CRP >10 mg/L.  
4

5 All serum creatinine and eGFR data were collected before, during, and after  
6 admission, to confirm baseline renal function and AKI during hospitalization. AKI was  
7 defined by serum creatinine change, as described in the Kidney Disease: Improving Global  
8 Outcomes (KDIGO) clinical practice guideline:<sup>17</sup> AKI was diagnosed when there was an  
9 abrupt reduction in kidney function, with an absolute increase in serum creatinine (SCr) level  
10 by  $\geq 0.3$  mg/dL within 48 hours, and/or an increase of more than 1.5-fold from the baseline  
11 SCr level within 7 days. Then, AKI stages were further evaluated as follows: AKI stage I, an  
12 increase in SCr 1.5–1.9 times from baseline, or by  $\geq 0.3$  mg/dL; AKI stage II, an increase in  
13 SCr of 2.0–2.9 times from baseline; AKI stage III, an increase in SCr more than 3.0 times  
14 from baseline,  $\geq 4.0$  mg/dL, or the initiation of renal replacement therapy. Urine output  
15 criteria were not considered due to the inaccuracy of the data, which should be collected  
16 retrospectively.  
17  
18  
19  
20  
21  
22  
23  
24  
25  
26  
27  
28  
29  
30  
31

32 The size of the renal stone causing the occlusion was measured, with the longest  
33 diameter as the most accurate image modality of each patient. Hydronephrosis was divided  
34 into the four grades of I-IV, with reference to existing literature.<sup>18</sup> Grade I, dilation of the  
35 renal pelvis without dilatation of the calices; Grade II, dilation of the renal pelvis and calices,  
36 that become convex, and no signs of cortical thinning; Grade III, the presence of cortical  
37 thinning; Grade IV, massive dilation of the renal pelvis and calices, with severe cortical  
38 thinning.  
39  
40  
41  
42  
43  
44  
45  
46  
47  
48  
49  
50

### 51 ***Primary and Secondary Objectives***

52 The primary objective of this study was to evaluate whether the duration of urinary tract  
53 obstruction affects the renal outcome. The secondary objective was to evaluate whether the  
54 AKI, APN or both events affect the renal outcome. Renal outcomes were evaluated with an  
55  
56  
57  
58  
59  
60



1  
2  
3 eGFR decrease  $\geq 30\%$  and/or end-stage renal disease (ESRD), and an eGFR decrease  $\geq 50\%$   
4 and/or ESRD. Each renal outcome was collected from an event that occurred 3 months after  
5  
6 discharge from obstructive uropathy.  
7  
8  
9

### 10 11 12 ***Statistical Analysis*** 13

14 Most analyses were performed using R version 3.4.4 (R Foundation for Statistical  
15 Computing, Vienna, Austria). Continuous variables were expressed as the median (min-max)  
16 and were compared by using the Mann-Whitney *U* test. For categorical variables, data were  
17 expressed as percentages and compared using the Chi-squared test. Renal outcome-free  
18 survival rates were also performed, using the Kaplan-Meier method, and decision and  
19 survival tree analysis.  $p < 0.05$  was considered statistically significant.  
20  
21  
22  
23  
24  
25  
26  
27  
28  
29  
30

### 31 ***Patient and public involvement*** 32

33 Patients were not involved in the design of this analysis.  
34  
35  
36  
37

### 38 **Results** 39

#### 40 ***Baseline Data by Obstruction Duration*** 41

42 From January 2005 to December 2015, a total of 2314 patients with urinary tract stone  
43 disease were identified, and a total of 1607 patients were confirmed suitable for analysis. 707  
44 patients were excluded for the following reasons: no evidence of obstructive uropathy (259),  
45 obstruction onset date unknown (187), obstruction release date unknown (the symptom  
46 relieve date is not specified in spontaneous release, or there is no image evidence) (175),  
47 staghorn stone (55), pediatric patients (12), obstructive uropathy due to other causes besides a  
48 renal stone (11), and follow up loss after discharge (8). The baseline characteristics of 1607  
49 enrolled patients are described in table 1.  
50  
51  
52  
53  
54  
55  
56  
57  
58  
59  
60

Table 1. Characteristics according to obstruction duration

|                                                 | Obstruction duration<br>=< 7 days<br>(n=913) | Obstruction duration<br>> 7 days<br>(n=694) | Total<br>(N=1607)    |
|-------------------------------------------------|----------------------------------------------|---------------------------------------------|----------------------|
| Male Gender, n (%)                              | 538 (58.9%)                                  | 435 (62.7%)                                 | 973 (60.5%)          |
| Age (years old)                                 | 52 (39-62)                                   | 56 (45-67)                                  | 54 (41-64)           |
| Hypertension, n (%)                             | 220 (24.1%)                                  | 273 (39.3%)                                 | 493 (30.7%)          |
| Diabetes mellitus, n (%)                        | 114 (12.5%)                                  | 156 (22.5)                                  | 270 (16.8%)          |
| Chronic kidney disease, n (%)                   | 14 (1.5%)                                    | 16 (2.3%)                                   | 30 (1.9%)            |
| Obstruction release procedure, n (%)            |                                              |                                             |                      |
| Spontaneous release                             | 71 (7.7%)                                    | 17 (2.5%)                                   | 88 (5.4%)            |
| Double-J stenting                               | 269 (29.5%)                                  | 236 (34.0%)                                 | 505 (31.4%)          |
| Percutaneous nephrostomy                        | 31 (3.4%)                                    | 21 (3.0%)                                   | 52 (3.2%)            |
| Operation (stone removal)                       | 206 (22.6%)                                  | 288 (41.5%)                                 | 494 (30.7%)          |
| ESWL                                            | 336 (36.8%)                                  | 132 (19.0%)                                 | 468 (29.1%)          |
| Obstruction duration (days)                     | 3.0 (3.0-5.0)                                | 18.0 (11.0-31.3)                            | 6.0 (2.0-15.0)       |
| Baseline sCr (mg/dL)                            | 0.80 (0.42-0.96)                             | 0.80 (0.66-1.00)                            | 0.80 (0.65-0.98)     |
| Baseline eGFR<br>(ml/min/1.73m <sup>2</sup> )*  | 94.89 (78.66-113.66)                         | 91.67 (74.68-112.77)                        | 93.62 (77.00-113.43) |
| sCr at admission (mg/dL)                        | 1.00 (0.80-1.25)                             | 1.00 (0.80-1.20)                            | 1.00 (0.80-1.21)     |
| eGFR at admission (ml/min/1.73m <sup>2</sup> )* | 74.14 (58.15-91.37)                          | 74.76 (57.19-90.92)                         | 74.54 (57.81-91.25)  |
| Performed imaging modality for diagnosis, n (%) |                                              |                                             |                      |
| KUB                                             | 43 (4.7%)                                    | 75 (10.8%)                                  | 118 (7.3%)           |
| Kidney sonography                               | 11 (1.2%)                                    | 6 (0.9%)                                    | 17 (1.1%)            |
| Computed tomography                             | 696 (76.2%)                                  | 493 (71.0%)                                 | 1189 (74%)           |
| IVP                                             | 163 (17.9%)                                  | 120 (17.3%)                                 | 283 (17.6%)          |
| Hydronephrosis grade, n (%)                     |                                              |                                             |                      |
| Grade 0 (No hydronephrosis)                     | 179 (20.9%)                                  | 141 (23.0%)                                 | 320 (21.8%)          |

|                     |               |                |               |
|---------------------|---------------|----------------|---------------|
| Grade 1             | 202 (23.6%)   | 115 (18.8%)    | 317 (21.6%)   |
| Grade 2             | 365 (42.6%)   | 172 (28.1%)    | 537 (36.6%)   |
| Grade 3             | 94 (11.0%)    | 117 (19.1%)    | 211 (14.4%)   |
| Grade 4             | 17 (2.0%)     | 67 (11.0%)     | 94 (5.8%)     |
| Obstruction side    |               |                |               |
| Left                | 456 (50.2%)   | 328 (47.7%)    | 784 (49.1%)   |
| Right               | 393 (43.3%)   | 300 (43.6%)    | 693 (43.4%)   |
| Bilateral           | 35 (3.8%)     | 26 (3.8%)      | 61 (3.8%)     |
| Undefined           | 24 (2.6%)     | 34 (4.9%)      | 58 (3.7%)     |
| Stone size (mm)     | 5.6 (4.3-7.7) | 7.7 (5.6-10.9) | 6.5 (4.8-9.0) |
| Pain killer, n (%)  |               |                |               |
| No use              | 169 (18.5%)   | 159 (22.9%)    | 328 (20.4%)   |
| NSAIDs (Old)        | 293 (32.1%)   | 195 (28.1%)    | 488 (30.4%)   |
| NSAIDs (New)        | 389 (42.6%)   | 303 (43.7%)    | 692 (43.1%)   |
| Narcotic analgesics | 62 (6.8%)     | 37 (5.3%)      | 99 (6.2%)     |

---

\*eGFR was calculated using the IDMS-MDRD equation (ml/min/1.73 m<sup>2</sup>).

Abbreviations: ESWL, Electrocorticoreal Shock Wave Lithotripsy; sCr, serum creatinine; eGFR, estimated glomerular filtration rate; KUB, kidney ureter bladder x-ray; IVP, intravenous pyelogram; NSAIDs: Non-steroidal anti-inflammatory drugs

1  
2  
3 Obstruction duration was at least 0 days (obstruction release at the day of symptom  
4 onset), with the maximum being 1099 days, the median obstruction duration was 6 days  
5 (interquartile range 2–15 days), and the mean obstruction duration was 16.6 days. APN due  
6 to obstruction was observed in 14.6% of patients and the mean CRP value of the patients with  
7 APN was 54.8 mg/L. Patients with HT, DM, and CKD had significantly higher rates of APN  
8 (19.3% in HT, 23% in DM, and 43.3% in CKD), accompanied by obstructive uropathy. AKI  
9 was observed in 629 patients (39.1%): 467 (74.2%) were stage I, 101 (16.1%) were stage II,  
10 and 61 (9.7%) were stage III. Non-steroidal anti-inflammatory drugs (NSAIDs) were  
11 prescribed for pain control in 73.5% of patients. The mean follow-up duration of patients was  
12 18.4 months.

13  
14  
15  
16  
17  
18  
19  
20  
21  
22  
23  
24  
25  
26  
27  
28  
29  
30  
31  
32  
33  
34  
35  
36  
37  
38  
39  
40  
41  
42  
43  
44  
45  
46  
47  
48  
49  
50  
51  
52  
53  
54  
55  
56  
57  
58  
59  
60

When comparing obstruction release time within 7 days (group 1) and obstruction release time over 7 days (group 2), the group 2 patients were older and the prevalence of HTN and type 2 DM were significantly higher. No significant differences were found in serum Cr and eGFR values between the two groups at the time of admission of obstructive uropathy due to urolithiasis.

In group 1, 7.4% of patients were spontaneously released, whereas only 1.9% were spontaneously released in the group 2 patients. Percutaneous nephrostomy was performed more frequently in APN than in non-APN patients (10.2% vs. 2.0%, figure 1).

The stone size was significantly different according to the obstruction release method, as it was  $4.7 \pm 2.8$  mm in the spontaneous release group and  $11.6 \pm 7.9$  mm in the percutaneous nephrostomy group (figure 1B). Group 1 patients were more likely to take computed tomography with diagnostic modality and hydronephrosis less than grade II.

### ***Baseline Data of Subcategorization by APN and/or AKI***

The baseline characteristics of the 1607 patients subcategorized by APN and/or AKI are

1  
2  
3 described in table 2. In group 1 patients, obstruction duration tended to be longer in patients  
4  
5 with complications. However, in group 2, obstruction duration was longer in patients without  
6  
7 complications. In both groups 1 and 2, the prevalence of underlying diseases such as HT, DM  
8  
9 and baseline CKD was higher in patients with AKI. NSAID was the most commonly used  
10  
11 analgesic in these patients. However, only those with both APN and AKI had more narcotic  
12  
13 analgesics prescriptions. Patients with AKI showed a lower initial eGFR compared to patients  
14  
15 without AKI at the time of admission. People who had the obstruction released within 7 days  
16  
17 and people with complications (APN or AKI) tended to have a larger stone size, but those  
18  
19 with the obstruction released after more than 7 days did not show any correlation.  
20  
21  
22  
23  
24  
25  
26  
27  
28  
29  
30  
31  
32  
33  
34  
35  
36  
37  
38  
39  
40  
41  
42  
43  
44  
45  
46  
47  
48  
49  
50  
51  
52  
53  
54  
55  
56  
57  
58  
59  
60

Table 2. Characteristics according to obstruction duration &amp; AKI/APN

|                                      | Obstruction duration ≤ 7 days |                     |                    |                     | Obstruction duration > 7 days |                     |                    |                    |
|--------------------------------------|-------------------------------|---------------------|--------------------|---------------------|-------------------------------|---------------------|--------------------|--------------------|
|                                      | APN-AKI-<br>(N=504)           | APN-AKI+<br>(N=267) | APN+AKI-<br>(N=38) | APN+AKI+<br>(N=103) | APN-AKI-<br>(N=413)           | APN-AKI+<br>(N=188) | APN+AKI-<br>(N=24) | APN+AKI+<br>(N=69) |
| Male Gender                          | 287 (56.9%)                   | 182 (68.2%)         | 13 (34.2%)         | 55 (53.4%)          | 251 (60.8%)                   | 135 (71.8%)         | 10 (41.7%)         | 39 (56.5%)         |
| Age                                  | 48.0 (37.0-58.0)              | 55.0 (42.0-65.0)    | 52.5 (39.0-69.0)   | 60.0 (50.0-69.5)    | 54.0 (43.0-63.0)              | 59.0 (48.0-67.0)    | 55.5 (40.5-67.5)   | 67.0 (56.0-76.0)   |
| Obstruction release procedure, n (%) |                               |                     |                    |                     |                               |                     |                    |                    |
| Spontaneous release                  | 46 (9.1%)                     | 16 (6.0%)           | 4 (10.5%)          | 5 (4.9%)            | 10 (2.3%)                     | 4 (2.2%)            | 0 (0.0%)           | 3 (4.4%)           |
| Double-J stenting                    | 142 (28.2%)                   | 78 (29.2%)          | 11 (29.0%)         | 38 (36.9%)          | 139 (33.7%)                   | 63 (33.5%)          | 11 (45.8%)         | 23 (33.3%)         |
| PCN                                  | 8 (1.6%)                      | 6 (2.3%)            | 0 (0.0%)           | 17 (16.5%)          | 7 (1.7%)                      | 8 (4.3%)            | 1 (4.2%)           | 5 (7.3%)           |
| Operation (stone removal)            | 106 (21.0%)                   | 66 (24.7%)          | 14 (36.8%)         | 20 (19.4%)          | 182 (44.1%)                   | 78 (41.5%)          | 6 (25.0%)          | 22 (31.9%)         |
| ESWL                                 | 202 (40.1%)                   | 101 (37.8%)         | 9 (23.7%)          | 23 (22.3%)          | 75 (18.2%)                    | 35 (18.6%)          | 6 (25.0%)          | 16 (23.2%)         |
| Obstruction duration                 | 3.0 (1.0-5.0)                 | 3.0 (1.5-4.0)       | 4.0 (2.0-6.0)      | 4.0 (2.0-5.0)       | 21.0 (12.0-33.0)              | 15.0 (10.0-30.0)    | 16.0 (10.0-27.0)   | 15.0 (10.0-27.0)   |
| Hypertension                         | 87 (17.3%)                    | 85 (31.8%)          | 10 (26.3%)         | 38 (36.9%)          | 137 (33.2%)                   | 88 (46.8%)          | 7 (29.2%)          | 41 (59.4%)         |
| Diabetes mellitus                    | 37 (7.3%)                     | 47 (17.6%)          | 4 (10.5%)          | 26 (25.2%)          | 67 (16.2%)                    | 57 (30.3%)          | 4 (16.7%)          | 28 (40.6%)         |
| Chronic kidney disease               | 0 (0.0%)                      | 7 (2.6%)            | 0 (0.0%)           | 7 (6.8%)            | 2 (0.5%)                      | 7 (3.7%)            | 1 (4.2%)           | 6 (8.7%)           |
| Pain killer                          |                               |                     |                    |                     |                               |                     |                    |                    |
| No use                               | 59 (11.7%)                    | 60 (22.5%)          | 9 (23.7%)          | 41 (39.8%)          | 58 (14.0%)                    | 58 (30.9%)          | 7 (29.2%)          | 36 (52.2%)         |
| NSAIDs (Old)                         | 20 (4.0%)                     | 19 (7.1%)           | 5 (13.2%)          | 18 (17.5%)          | 17 (4.1%)                     | 10 (5.3%)           | 1 (4.2%)           | 9 (13.0%)          |
| NSAIDs (New)                         | 251 (49.8%)                   | 100 (37.5%)         | 17 (44.7%)         | 21 (20.4%)          | 214 (51.8%)                   | 70 (37.2%)          | 9 (37.5%)          | 10 (14.5%)         |
| Narcotic analgesics                  | 174 (34.5%)                   | 88 (33.0%)          | 7 (18.4%)          | 23 (22.3%)          | 124 (30.0%)                   | 50 (26.6%)          | 7 (29.2%)          | 14 (20.3%)         |
| Baseline sCr (mg/dL)                 | 0.8 (0.7-0.9)                 | 0.8 (0.7-1.0)       | 0.7 (0.5-0.8)      | 0.8 (0.6-1.0)       | 0.8 (0.7-1.0)                 | 0.8 (0.7-1.0)       | 0.8 (0.6-1.0)      | 0.9 (0.6-1.2)      |

|                                                    |                   |                   |                    |                   |                   |                   |                   |                   |
|----------------------------------------------------|-------------------|-------------------|--------------------|-------------------|-------------------|-------------------|-------------------|-------------------|
| Baseline eGFR<br>(ml/min/1.73m <sup>2</sup> )*     | 96.6 (81.0-112.9) | 91.4 (74.5-113.8) | 105.2 (89.7-126.4) | 93.7 (73.4-111.3) | 94.0 (79.1-113.7) | 91.3 (68.7-114.9) | 92.4 (69.1-109.2) | 79.1 (59.6-103.4) |
| sCr at admission<br>(mg/dL)                        | 0.9 (0.7-1.0)     | 1.2 (1.0-1.5)     | 0.8 (0.7-1.0)      | 1.4 (1.1-1.7)     | 0.9 (0.7-1.0)     | 1.2 (1.0-1.6)     | 0.9 (0.7-1.1)     | 1.6 (1.1-2.0)     |
| eGFR at admission<br>(ml/min/1.73m <sup>2</sup> )* | 85.6 (73.7-99.7)  | 58.0 (46.7-69.1)  | 80.6 (68.6-100.2)  | 48.4 (34.1-63.9)  | 83.5 (71.8-100.7) | 57.6 (43.9-73.5)  | 75.6 (59.5-91.9)  | 40.9 (31.0-61.6)  |
| Performed imaging modality for diagnosis, n (%)    |                   |                   |                    |                   |                   |                   |                   |                   |
| KUB                                                | 3 (6.0%)          | 10 (3.8%)         | 1 (2.6%)           | 2 (1.9%)          | 47 (11.4%)        | 26 (13.8%)        | 0 (0.0%)          | 2 (2.9%)          |
| Kidney<br>sonography                               | 8 (1.6%)          | 3 (1.1%)          | 0 (0.0%)           | 0 (0.0%)          | 4 (1.0%)          | 1 (0.5%)          | 0 (0.0%)          | 1 (1.5%)          |
| CT                                                 | 368 (73.0%)       | 198 (74.2%)       | 35 (92.1%)         | 94 (91.3%)        | 283 (68.5%)       | 128 (68.1%)       | 21 (87.5%)        | 61 (88.4%)        |
| IVP                                                | 98 (19.4%)        | 56 (21.0%)        | 2 (5.3%)           | 7 (6.8%)          | 79 (19.1%)        | 33 (17.6%)        | 3 (12.5%)         | 5 (7.3%)          |
| Hydronephrosis grade                               |                   |                   |                    |                   |                   |                   |                   |                   |
| No<br>hydronephrosis                               | 127 (25.2%)       | 37 (13.9%)        | 4 (10.5%)          | 11 (10.7%)        | 97 (23.5%)        | 28 (14.9%)        | 7 (29.2%)         | 9 (13.0%)         |
| Grade 1                                            | 116 (23.0%)       | 55 (20.6%)        | 12 (31.6%)         | 19 (18.5%)        | 65 (15.7%)        | 34 (18.1%)        | 3 (12.5%)         | 13 (18.8%)        |
| Grade 2                                            | 178 (35.3%)       | 120 (44.9%)       | 18 (47.4%)         | 48 (46.6%)        | 98 (23.7%)        | 48 (25.5%)        | 6 (25.0%)         | 20 (29.0%)        |
| Grade 3                                            | 39 (7.7%)         | 34 (12.7%)        | 3 (7.9%)           | 18 (17.5%)        | 66 (16.0%)        | 30 (16.0%)        | 6 (25.0%)         | 16 (23.2%)        |
| Grade 4                                            | 7 (1.4%)          | 5 (1.9%)          | 1 (2.6%)           | 4 (3.9%)          | 36 (8.7%)         | 22 (11.7%)        | 0 (0.0%)          | 8 (11.6%)         |
| Obstruction side                                   |                   |                   |                    |                   |                   |                   |                   |                   |
| Left                                               | 252 (50.4%)       | 132 (49.6%)       | 21 (55.3%)         | 50 (48.5%)        | 190 (46.3%)       | 92 (49.7%)        | 12 (50.0%)        | 34 (49.3%)        |
| Right                                              | 210 (42.0%)       | 121 (45.5%)       | 13 (34.2%)         | 49 (47.6%)        | 179 (43.7%)       | 76 (41.1%)        | 11 (45.8%)        | 34 (49.3%)        |
| Bilateral                                          | 4 (0.8%)          | 5 (1.9%)          | 2 (5.3%)           | 3 (2.9%)          | 9 (2.2%)          | 4 (2.2%)          | 0 (0.0%)          | 0 (0.0%)          |
| Undefined                                          | 19 (3.8%)         | 5 (1.9%)          | 0 (0.0%)           | 0 (0.0%)          | 23 (5.6%)         | 10 (5.4%)         | 1 (4.2%)          | 0 (0.0%)          |
| Stone size (mm)                                    | 5.3 (4.1-7.34)    | 6.0 (4.6-7.7)     | 6.0 (4.8-6.9)      | 6.1 (4.8-8.9)     | 7.6 (5.6-10.7)    | 8.4 (5.8-12.0)    | 6.3 (4.1-9.4)     | 8.2 (6.2-10.0)    |

\*eGFR was calculated using the IDMS-MDRD equation (ml/min/1.73 m<sup>2</sup>).

1  
2  
3 Abbreviations: PCN, Percutaneous nephrostomy; ESWL, Electrocorporeal Shock Wave Lithotripsy; sCr, serum creatinine; eGFR, estimated glomerular filtration rate;  
4 KUB, kidney ureter bladder x-ray; CT, computed tomography; IVP, intravenous pyelogram; NSAIDs: Non-steroidal anti-inflammatory drugs  
5  
6  
7  
8  
9  
10  
11  
12  
13  
14  
15  
16  
17  
18  
19  
20  
21  
22  
23  
24  
25  
26  
27  
28  
29  
30  
31  
32  
33  
34  
35  
36  
37  
38  
39  
40  
41  
42  
43  
44  
45  
46

For peer review only



### Outcome by Obstruction Duration

In this study, APN occurred more frequently in group 2 patients compared to group 1 (29.3% vs. 10.2%,  $p < 0.001$ ). The last serum creatinine (0.86 vs. 0.90 mg/dL,  $p = 0.004$ ) and eGFR (87 vs. 81 ml/min/1.73 m<sup>2</sup>,  $p = 0.001$ ) also showed worse renal function in group 2 patients (table 3).

Table 3. Outcome variables by obstruction duration

|                                                               | Obstruction<br>duration<br>≤ 7 days<br>(n=913) | Obstruction<br>duration<br>> 7 days<br>(n=694) | Total<br>(N=1607) | P      |
|---------------------------------------------------------------|------------------------------------------------|------------------------------------------------|-------------------|--------|
| Acute pyelonephritis, n (%)                                   | 24 (10.2%)                                     | 46 (29.3%)                                     | 235 (14.6%)       | <0.001 |
| Peak CRP (mg/L)                                               | 3.3 (0.8-42.3)                                 | 31.3 (1.7-145.0)                               | 5.9 (1.0-73.3)    | <0.001 |
| Peak sCr during admission (mg/dL)                             | 1.0 (0.8-1.3)                                  | 1.0 (0.8-1.3)                                  | 1.0 (0.8-1.3)     | 0.454  |
| Lowest eGFR during admission<br>(ml/min/1.73m <sup>2</sup> )* | 72.4 (56.1-89.6)                               | 71.9 (53.4-88.6)                               | 72.0 (55.1-89.0)  | 0.307  |
| AKI                                                           |                                                |                                                |                   |        |
| no AKI                                                        | 542 (59.4%)                                    | 436 (62.8%)                                    | 978 (60.9%)       | 0.491  |
| KDIGO stage I                                                 | 274 (30.0%)                                    | 192 (27.7%)                                    | 466 (29.0%)       |        |
| KDIGO stage II                                                | 62 (6.8%)                                      | 39 (5.6%)                                      | 101 (6.3%)        |        |
| KDIGO stage III                                               | 34 (3.7%)                                      | 27 (3.9%)                                      | 61 (3.8%)         |        |
| GFR 30% reduction, n (%)                                      | 100 (11.0%)                                    | 105 (15.1%)                                    | 205 (12.8%)       | 0.016  |
| GFR 50% reduction, n (%)                                      | 24 (2.6%)                                      | 39 (5.6%)                                      | 63 (3.9%)         | 0.003  |
| Final sCr (mg/dL)                                             | 0.9 (0.7-1.1)                                  | 0.9 (0.7-1.1)                                  | 0.9 (0.7-1.1)     | 0.004  |
| Final eGFR (ml/min/1.73m <sup>2</sup> )*                      | 87.0 (71.1-102.4)                              | 81.0 (64.0-100.5)                              | 84.4 (68.3-101.1) | 0.001  |
| ΔGFR/yr                                                       | 2.5 (0.0-35.8)                                 | 5.7 (0.0-162.8)                                | 4.0 (0.0-78.5)    | 0.004  |

\*eGFR was calculated using the IDMS-MDRD equation (ml/min/1.73 m<sup>2</sup>).

Abbreviations: CRP, C-reactive protein; sCr, serum creatinine; eGFR, estimated glomerular filtration rate; AKI, acute kidney injury; KDIGO, Kidney Disease: Improving Global Outcomes

1  
2  
3 When the prognosis was evaluated by the quartile of obstruction duration of all  
4 patients, the longer the obstruction duration, the greater the likelihood of a decrease in GFR  
5 more than 30% (log-rank  $p=0.052$ , figure 2A), and a decrease in GFR of more than 50%  
6 (log-rank  $p=0.016$ , HR 1.23, 95% CI 0.98-1.55, figure 2B) respectively. When we compare  
7 the results of the two groups, there was a significant increase in the possibility of GFR  
8 reduction >30% (log-rank  $p=0.022$ , HR 1.38, 95% CI 1.05-1.81, figure 2C) and >50% (log-  
9 rank  $p=0.003$ , HR 2.12, 95% CI 1.27-3.53, figure 2D) in Group 2 (figure 2).

### 21 ***Outcome by APN and/or AKI***

22 Patients who did not have APN or AKI in Group 1 had no events, with a GFR reduction of  
23 more than 50% (table 4).

24 When examining the effect of APN during hospitalization with obstructive uropathy  
25 on renal outcome, patients with APN were significantly more likely to have a GFR reduction  
26 >30% (log-rank  $p<0.001$ , HR 2.61, 95% CI 1.91-3.56, figure 3A) and a GFR reduction >50%  
27 (log-rank  $p<0.001$ , HR 5.81, 95% CI 3.50-9.63, figure 3B).

28 When we examined the renal outcome according to the extent of AKI during  
29 hospitalization, AKI stage I showed a favorable outcome. However, patients with severe AKI  
30 of grade II or III, the probability of GFR reduction >30% (log-rank  $p<0.001$ , HR 1.58, 95%  
31 CI 1.37-1.82, figure 3C) and >50% (log-rank  $p<0.001$ , HR 2.62, 95% CI 2.05-3.34, figure  
32 3D) was significantly higher than the others.

33 The prognosis was best when neither AKI nor APN was present, and the prognosis  
34 was progressively worse with AKI alone, APN alone and both AKI and APN, consecutively  
35 (log-rank  $p<0.001$ , HR 1.50, 95% CI 1.33-1.71 for figure 3E; log-rank  $p<0.001$ , HR 2.18,  
36 95% CI 1.75-2.71 for figure 3F).

Table 4. Outcomes according to the obstruction duration &amp; AKI/APN

|                                              | Obstruction duration ≤ 7 days |                      |                       |                       | P      | Obstruction duration > 7 days |                      |                       |                        | P      |
|----------------------------------------------|-------------------------------|----------------------|-----------------------|-----------------------|--------|-------------------------------|----------------------|-----------------------|------------------------|--------|
|                                              | APN-AKI-<br>(N=504)           | APN-AKI+<br>(N=267)  | APN+AKI-<br>(N=38)    | APN+AKI+<br>(N=103)   |        | APN-AKI-<br>(N=413)           | APN-AKI+<br>(N=188)  | APN+AKI-<br>(N=24)    | APN+AKI+<br>(N=69)     |        |
| Peak CRP (mg/L)                              | 1.0 (0.4-2.5)                 | 1.4 (0.7-3.3)        | 69.2 (29.0-<br>122.6) | 78.4 (33.5-<br>171.2) | <0.001 | 1.1 (0.4-2.1)                 | 1.6 (0.9-3.7)        | 55.1 (28.6-<br>95.6)  | 141.3 (61.0-<br>224.3) | <0.001 |
| Peak sCr (mg/dL)                             | 0.9 (0.7-1.0)                 | 1.3 (1.1-1.6)        | 0.9 (0.7-1.0)         | 1.5 (1.1-1.9)         | <0.001 | 0.9 (0.8-1.1)                 | 1.3 (1.1-1.7)        | 0.9 (0.8-1.1)         | 1.8 (1.3-2.6)          | <0.001 |
| Lowest eGFR<br>(ml/min/1.73m <sup>2</sup> )* | 84.4 (72.9-<br>97.9)          | 55.1 (44.6-<br>66.4) | 79.1 (68.6-<br>98.4)  | 46.2 (32.1-<br>59.7)  | <0.001 | 81.1 (69.2-<br>97.0)          | 54.9 (41.0-<br>69.1) | 74.2 (58.0-<br>82.7)  | 36.9 (25.0-<br>50.7)   | <0.001 |
| GFR 30%<br>reduction, n (%)                  | 21 (4.17%)                    | 48 (18.0%)           | 6 (15.8%)             | 25 (24.3%)            | <0.001 | 32 (7.8%)                     | 50 (26.6%)           | 0 (0.0%)              | 23 (33.3%)             | <0.001 |
| GFR 50%<br>reduction, n (%)                  | 0 (0.0%)                      | 10 (3.8%)            | 1 (2.6%)              | 13 (12.6%)            | <0.001 | 8 (1.9%)                      | 18 (9.6%)            | 0 (0.0%)              | 13 (18.8%)             | <0.001 |
| Final sCr (mg/dL)                            | 0.8 (0.7-1.0)                 | 0.9 (0.8-1.2)        | 0.7 (0.6-0.9)         | 0.9 (0.7-1.1)         | <0.001 | 0.8 (0.7-1.0)                 | 1.0 (0.8-1.3)        | 0.8 (0.7-1.1)         | 1.1 (0.8-1.7)          | <0.001 |
| Final eGFR<br>(ml/min/1.73m <sup>2</sup> )*  | 90.5 (75.5-<br>105.8)         | 80.3 (63.4-<br>97.6) | 92.0 (81.5-<br>109.4) | 76.7 (60.1-<br>95.8)  | <0.001 | 86.0 (73.0-<br>103.2)         | 75.8 (53.7-<br>97.8) | 78.0 (64.2-<br>100.2) | 61.1 (38.4-<br>85.4)   | <0.001 |

\*eGFR was calculated using the IDMS-MDRD equation (ml/min/1.73 m<sup>2</sup>).

Abbreviations: CRP, C-reactive protein; sCr, serum creatinine; eGFR, estimated glomerular filtration rate; AKI, acute kidney injury

### ***Factors affecting the Renal Outcomes***

We conducted multivariate analysis for the occurrence of a decrease in eGFR >50%. When we adjusted for age, sex, hypertension, DM, APN, AKI, and obstruction duration group (defined by before and after 7 days), we found that concomitant APN (HR 3.495, 95% CI 1.942–6.289;  $p<0.001$ ), concomitant AKI (HR 3.284, 95% CI 1.354–7.965,  $p=0.009$  for AKI stage II; HR 6.425, 95% CI 2.599–15.881,  $p<0.001$  for AKI stage III) and obstruction duration >7 days (HR 1.854, 95% CI 1.095–3.140,  $p=0.001$ ) were independently associated with an eGFR decrease of >50% (table 5).

Table 5. Multivariate analysis for the occurrence of eGFR decrease of >50%

|                                         | HR    | 95% CI       | P      |
|-----------------------------------------|-------|--------------|--------|
| Female                                  | 1.177 | 0.691-2.006  | 0.548  |
| Age                                     | 1.017 | 0.997-1.037  | 0.103  |
| Hypertension                            | 1.743 | 0.994-3.057  | 0.053  |
| Diabetes mellitus                       | 0.939 | 0.533-1.656  | 0.829  |
| Acute pyelonephritis                    | 3.495 | 1.942-6.289  | <0.001 |
| Acute kidney injury                     |       |              |        |
| Stage I                                 | 1.580 | 0.706-3.536  | 0.265  |
| Stage II                                | 3.284 | 1.354-7.965  | 0.009  |
| Stage III                               | 6.425 | 2.599-15.881 | <0.001 |
| Group 2 (obstruction duration > 7 days) | 1.854 | 1.095-3.140  | 0.022  |

Abbreviations: HR, hazard ratio; CI, confidence interval.

### ***Tree Analysis***

Using a decision tree model, AKI stage III was identified at the first decision node as being the most important risk factor. It predicted a rate of GFR decrease >50% of 31.7% ( $p<0.001$ , figure 4A-decision tree). The second most important risk factor was AKI stage II ( $p=0.03$ ).

1  
2  
3 An age >49 years at the time of obstructive uropathy was selected at the next node in the  
4 group of patients with AKI stage I (p=0.019). Concomitant APN during the obstruction  
5 episode was presented for the next node in the group of patients without AKI, and obstruction  
6 duration is <7 days (p=0.002). An obstruction duration >7 days was selected at the next node  
7 in the group of patients without AKI (p=0.035). Input variables were sex, age, APN, AKI  
8 stage, and obstruction duration group; the accuracy of this tree analysis was 96.1%.  
9  
10  
11  
12  
13  
14  
15

16  
17 When we performed a survival tree analysis with variables of sex, age, APN, AKI  
18 stage, and obstruction duration groups, AKI stage III (p<0.001) was the most potent factor for  
19 the development of a GFR decrease >50%, and APN (p<0.001) was the second. An  
20 obstruction duration of more than 7 days (p=0.007) was also an independent risk factor for  
21 major renal outcome in the survival tree analysis (figure 4B).  
22  
23  
24  
25  
26  
27  
28  
29  
30

### 31 **Discussion**

32  
33 In this study, we discovered that obstructive uropathy caused by urolithiasis had the worst  
34 effect on renal outcome in patients with stage II or higher AKI at the time of obstruction. We  
35 also found that patients with APN and obstruction release after 7 days or more were  
36 associated with poor prognosis.  
37  
38  
39  
40  
41

42 In general, renal failure due to unilateral renal stones is known to be rare.<sup>19</sup> In some  
43 previous studies, the incidence of acute renal injury due to renal stones was reported to be in  
44 the range of 0.72–9.7%, and AKI affects to the development or progression of CKD.<sup>20 21</sup>  
45 However, in this study, AKI occurred in 39.1% of unilateral obstructive uropathy patients,  
46 and even if only patients with AKI stage II or III, excluding AKI stage I, were included, AKI  
47 was associated with 10.1%. Unilateral ureteral obstruction is known to result in GFR  
48 reduction due to renal vasoconstriction related with tubuloglomerular feedback, as the  
49 intratubular pressure is increased.<sup>22</sup> Furthermore, recurrent episodes of obstructive uropathy  
50  
51  
52  
53  
54  
55  
56  
57  
58  
59  
60

1  
2  
3 by urolithiasis and obstructive uropathy in single kidneys have a high risk of deteriorating  
4 renal function. In the presence of underlying latent CKD, even unilateral obstructive uropathy  
5 may cause acute renal function decline due to insufficient compensation in the opposite  
6 kidney.<sup>19</sup> Nephrolithiasis itself is known to cause interstitial fibrosis and glomerulosclerosis  
7 due to inflammatory cascade stimulation, as well as the recurrence of episodes and infection  
8 of the occlusion, ultimately increasing the risk of CKD and ESRD.<sup>23 24</sup>  
9

10  
11  
12 In group 2 patients with obstruction release after 7 days, the obstruction duration was  
13 longer when there were no complications. Considering the features and limitations of this  
14 retrospective study, complications such as AKI or APN urgently needed obstacle release.  
15 This is probably because obstruction release was performed more quickly than those without  
16 AKI or APN. Conversely, in the case of asymptomatic urolithiasis, which did not cause any  
17 particular complications, selection bias could be possible since treatment was not performed  
18 in an urgent manner. Nevertheless, when AKI and APN were both adjusted, various statistical  
19 analyses confirmed the association of poor renal outcome with those who had an obstruction  
20 duration of more than 7 days. It seemed to be important to release the obstruction as soon as  
21 possible.  
22  
23  
24  
25  
26  
27  
28  
29  
30  
31  
32  
33  
34  
35  
36  
37  
38  
39

40 In the present study, NSAIDs were the most commonly considered analgesics, as  
41 recommended by the guideline.<sup>25</sup> Only those with both APN and AKI tended to use narcotic  
42 analgesics instead of NSAIDs. This is probably because people with both APN and AKI had  
43 the worst renal function. People with AKI alone were either not aware of AKI as it was very  
44 mild or did not consider it significant enough to have any effect on NSAID usage.  
45  
46  
47  
48  
49  
50

51 When accompanied with sepsis, decompression therapy by percutaneous  
52 nephrostomy was performed frequently in patients with APN, which was consistent with the  
53 guideline recommending urgent decompression, such as percutaneous drainage.<sup>26 27</sup>  
54  
55  
56  
57

58 In this study, the most important prognostic factors of renal outcome were AKI stage  
59  
60

1  
2  
3 II or III, APN and obstruction duration, from both multivariate analyses and the decision tree  
4 analysis. Although renal insult due to the occurrence of obstructive uropathy should have  
5 been apparent, decision tree analysis showed a good prognosis for renal function if there both  
6 AKI and APN are absent and the obstruction was released within 7 days. The result showed  
7 that performing obstruction release as soon as possible, even for those without complications,  
8 is important for improved renal outcome.  
9

10  
11  
12  
13  
14  
15  
16  
17 This study has the limitations of being a retrospective study, and the results cannot  
18 prove a causal relationship. However, considering the difficult characteristics of this study in  
19 performing a randomized controlled trial, it is possible to consider that lowering the incidence  
20 of AKI or APN through early obstruction release may have an additional benefit in improving  
21 prognosis. Especially in patients with recurrent urolithiasis, it would be better to minimize the  
22 insult to the patient's kidney per episode. In addition, the retrospective aspect of this study  
23 may introduce selection bias and mis-classification.  
24  
25  
26  
27  
28  
29  
30  
31  
32

33  
34 In addition, although the date of symptom occurrence and the date of obstruction  
35 release were collected from the electric medical records, there is a possibility that the  
36 symptom date was inaccurate and that it was not an obstruction-specific date. As evidence  
37 was required for the spontaneous resolution of obstruction release dates, the actual date may  
38 be later than the date on which the symptoms were relieved.  
39  
40  
41  
42  
43  
44

45  
46 Obstruction duration is an independent risk factor for poor renal outcome with  
47 concomitant APN and AKI in urolithiasis related obstructive uropathy. Early obstruction  
48 release may contribute to the improvement of prognosis by reducing the incidence of  
49 infection or acute renal failure.  
50  
51  
52  
53  
54  
55

56 **Contributors:** Research idea and study design: JHH; data acquisition: EHL, SK, JS, SBP,  
57 BHC, JHH; data analysis/interpretation: EHL, SBP, BHC, JHH; statistical analysis: SK, JS,  
58  
59  
60

1  
2  
3 JHH; supervision or mentorship: JHH. Each author contributed important intellectual content  
4 during manuscript drafting or revision and accepts accountability for the overall work by  
5  
6 ensuring that questions pertaining to the accuracy or integrity of any portion of the work are  
7  
8 appropriately investigated and resolved.  
9  
10

### 11 **Funding**

12  
13  
14 This study was supported by a research grant from the National Research Foundation of  
15  
16 Korea funded by the Korean government (NRF-2018R1C1B6007937).  
17  
18

19 **Competing interests** None declared.  
20

21 **Patient consent for publication** Not required.  
22

23  
24 **Ethics approval** This study was approved by the institutional review board (IRB number:  
25  
26 1810-008-16212).  
27

28 **Provenance and peer review** Not commissioned; externally peer reviewed.  
29

30  
31 **Data sharing statement** The datasets used and/or analysed during the current study are  
32  
33 available from “Mendeley”: doi:10.17632/5phfg9dd48.1  
34

35  
36 **Open access** This is an open access article distributed in accordance with the Creative  
37  
38 Commons Attribution 4.0 Unported (CC BY 4.0) license, which permits others to copy,  
39  
40 redistribute, remix, transform and build upon this work for any purpose, provided the original  
41  
42 work is properly cited, a link to the licence is given, and indication of whether changes were  
43  
44 made. See: <https://creativecommons.org/licenses/by/4.0/>.  
45  
46  
47  
48  
49  
50  
51  
52  
53  
54  
55  
56  
57  
58  
59  
60



## References

1. Morgan MS, Pearle MS. Medical management of renal stones. *BMJ* 2016;352:i52. doi: 10.1136/bmj.i52
2. Romero V, Akpınar H, Assimos DG. Kidney stones: a global picture of prevalence, incidence, and associated risk factors. *Rev Urol* 2010;12(2-3):e86-96.
3. Lopez M, Hoppe B. History, epidemiology and regional diversities of urolithiasis. *Pediatr Nephrol* 2010;25(1):49-59. doi: 10.1007/s00467-008-0960-5
4. Stamatelou KK, Francis ME, Jones CA, et al. Time trends in reported prevalence of kidney stones in the United States: 1976-1994. *Kidney Int* 2003;63(5):1817-23. doi: 10.1046/j.1523-1755.2003.00917.x
5. Indridason OS, Birgisson S, Edvardsson VO, et al. Epidemiology of kidney stones in Iceland: a population-based study. *Scand J Urol Nephrol* 2006;40(3):215-20. doi: 10.1080/00365590600589898
6. Yasui T, Okada A, Hamamoto S, et al. The association between the incidence of urolithiasis and nutrition based on Japanese National Health and Nutrition Surveys. *Urolithiasis* 2013;41(3):217-24. doi: 10.1007/s00240-013-0567-6
7. Jung JS, Han CH, Bae S. Study on the prevalence and incidence of urolithiasis in Korea over the last 10 years: An analysis of National Health Insurance Data. *Investig Clin Urol* 2018;59(6):383-91. doi: 10.4111/icu.2018.59.6.383
8. Ansari MS, Gupta NP. Impact of socioeconomic status in etiology and management of urinary stone disease. *Urol Int* 2003;70(4):255-61. doi: 10.1159/000070130
9. Bartoletti R, Cai T, Mondaini N, et al. Epidemiology and risk factors in urolithiasis. *Urol Int* 2007;79 Suppl 1:3-7. doi: 10.1159/000104434
10. Ferrari P, Piazza R, Ghidini N, et al. Lithiasis and risk factors. *Urol Int* 2007;79 Suppl 1:8-15. doi: 10.1159/000104435

- 1  
2  
3 11. Jeong IG, Kang T, Bang JK, et al. Association between metabolic syndrome and the  
4 presence of kidney stones in a screened population. *Am J Kidney Dis* 2011;58(3):383-  
5  
6 8. doi: 10.1053/j.ajkd.2011.03.021  
7  
8
- 9  
10 12. Lotan Y. Economics and cost of care of stone disease. *Adv Chronic Kidney Dis*  
11  
12 2009;16(1):5-10. doi: 10.1053/j.ackd.2008.10.002  
13  
14
- 15 13. Trinchieri A. Epidemiological trends in urolithiasis: impact on our health care systems.  
16  
17 *Urol Res* 2006;34(2):151-6. doi: 10.1007/s00240-005-0029-x  
18  
19
- 20 14. Chawla LS, Kimmel PL. Acute kidney injury and chronic kidney disease: an integrated  
21  
22 clinical syndrome. *Kidney Int* 2012;82(5):516-24. doi: 10.1038/ki.2012.208  
23  
24
- 25 15. Horne KL, Packington R, Monaghan J, et al. Three-year outcomes after acute kidney  
26  
27 injury: results of a prospective parallel group cohort study. *BMJ Open*  
28  
29 2017;7(3):e015316. doi: 10.1136/bmjopen-2016-015316  
30  
31
- 32 16. Wood K, Keys T, Mufarrij P, et al. Impact of stone removal on renal function: a review.  
33  
34 *Rev Urol* 2011;13(2):73-89.  
35  
36
- 37 17. Ashizawa K, Ozawa Y, Okauchi K. Comparative studies of elemental composition on  
38  
39 ejaculated fowl, bull, rat, dog and boar spermatozoa by electron probe X-ray  
40  
41 microanalysis. *Comp Biochem Physiol A Comp Physiol* 1987;88(2):269-72.  
42  
43
- 44 18. Klahr S, Harris K, Purkerson ML. Effects of obstruction on renal functions. *Pediatr*  
45  
46 *Nephrol* 1988;2(1):34-42.  
47  
48
- 49 19. Gosmanova EO, Baumgarten DA, O'Neill WC. Acute kidney injury in a patient with  
50  
51 unilateral ureteral obstruction. *Am J Kidney Dis* 2009;54(4):775-9. doi:  
52  
53 10.1053/j.ajkd.2009.03.028  
54  
55
- 56 20. Wang SJ, Mu XN, Zhang LY, et al. The incidence and clinical features of acute kidney  
57  
58 injury secondary to ureteral calculi. *Urol Res* 2012;40(4):345-8. doi: 10.1007/s00240-  
59  
60 011-0414-6

- 1  
2  
3 21. Hussain M, Hashmi AH, Rizvi SA. Problems and prospects of neglected renal calculi in  
4  
5 Pakistan: can this tragedy be averted? *Urol J* 2013;10(2):848-55.  
6  
7  
8 22. Gaudio KM, Siegel NJ, Hayslett JP, et al. Renal perfusion and intratubular pressure  
9  
10 during ureteral occlusion in the rat. *Am J Physiol* 1980;238(3):F205-9. doi:  
11  
12 10.1152/ajprenal.1980.238.3.F205  
13  
14 23. Keddis MT, Rule AD. Nephrolithiasis and loss of kidney function. *Curr Opin Nephrol*  
15  
16 *Hypertens* 2013;22(4):390-6. doi: 10.1097/MNH.0b013e32836214b9  
17  
18 24. Loeffler I, Wolf G. Transforming growth factor-beta and the progression of renal disease.  
19  
20 *Nephrol Dial Transplant* 2014;29 Suppl 1:i37-i45. doi: 10.1093/ndt/gft267  
21  
22  
23 25. Turk C, Petrik A, Sarica K, et al. EAU Guidelines on Diagnosis and Conservative  
24  
25 Management of Urolithiasis. *Eur Urol* 2016;69(3):468-74. doi:  
26  
27 10.1016/j.eururo.2015.07.040  
28  
29  
30 26. Assimos D, Krambeck A, Miller NL, et al. Surgical Management of Stones: American  
31  
32 Urological Association/Endourological Society Guideline, PART I. *J Urol*  
33  
34 2016;196(4):1153-60. doi: 10.1016/j.juro.2016.05.090  
35  
36  
37 27. Assimos D, Krambeck A, Miller NL, et al. Surgical Management of Stones: American  
38  
39 Urological Association/Endourological Society Guideline, PART II. *J Urol*  
40  
41 2016;196(4):1161-9. doi: 10.1016/j.juro.2016.05.091  
42  
43  
44  
45  
46  
47  
48  
49  
50  
51  
52  
53  
54  
55  
56  
57  
58  
59  
60

## Figure Legends

**Figure 1:** Performed obstruction release procedures by APN, stone size, and obstruction duration

(A) Percutaneous nephrostomy was performed more frequently in patients with APN compared to non-APN patients (10.2% vs. 2.0%).

(B) Stone size was significantly different according to the obstruction release method ( $p < 0.001$ ). Patients who had the obstruction released through percutaneous nephrostomy showed the longest obstruction duration.

**Figure 2:** Kaplan–Meier curves for the renal outcomes

(A, B) When the prognosis was evaluated by the quartile of obstruction duration of all patients, the longer the obstruction duration, the greater the likelihood of a decrease in GFR of more than 30% ( $p = 0.052$ , Figure 2A) and a decrease in GFR of more than 50% ( $p = 0.016$ , Figure 2B)

(C, D) When we compare the results of the two groups, there was a significant increase in possibility of GFR reduction  $>30\%$  ( $p = 0.022$ , Figure 2C) and  $>50\%$  ( $p = 0.003$ , Figure 2D) in Group 2.

**Figure 3:** Kaplan–Meier curves for the renal outcomes by the occurrence of APN and/or AKI

(A, B) The patients with APN were significantly more likely to have a GFR reduction  $>30\%$  ( $p < 0.001$ , Figure 3A) and a GFR reduction  $>50\%$  ( $p < 0.001$ , Figure 3B).

(C, D) The patients with severe AKI of grade II or III, the probability of GFR reduction  $>30\%$  ( $p < 0.001$ , Figure 3C) and  $>50\%$  ( $p < 0.001$ , Figure 3D) were significantly higher than the others.

(E, F) The prognosis was best when neither AKI nor APN was present, and the prognosis was

1  
2  
3 progressively worse with AKI alone, APN alone, and both AKI and APN, consecutively  
4  
5 (p<0.001, Figure 3E, 3F).  
6  
7  
8  
9

10 **Figure 4.** Tree analyses

11  
12 (A) In a decision tree model, AKI was the most important risk factor for the GFR decrease  
13 >50% (p<0.001). The second most important risk factor was AKI stage II (p=0.03). An age  
14 >49 years at the time of obstructive uropathy was selected at the next node in the group of  
15 patients with AKI stage I (p=0.019). Concomitant APN during the obstruction episode was  
16 presented for the next node in the group of patients without AKI and obstruction duration is  
17 <7 days (p=0.002). An obstruction duration >7 days was selected at the next node, in the  
18 group of patients without AKI (p=0.035).  
19  
20  
21  
22  
23  
24  
25  
26  
27

28 (B) In a survival tree analysis with the variables of sex, age, APN, AKI stage, and obstruction  
29 duration groups, AKI stage III (p<0.001) was the most potent factor for the development of  
30 a GFR decrease >50%; APN was the second highest factor (p<0.001). An obstruction  
31 duration of more than 7 days (p=0.007) was also an independent risk factor for major renal  
32 outcomes in the survival tree analysis.  
33  
34  
35  
36  
37  
38  
39  
40  
41  
42  
43  
44  
45  
46  
47  
48  
49  
50  
51  
52  
53  
54  
55  
56  
57  
58  
59  
60

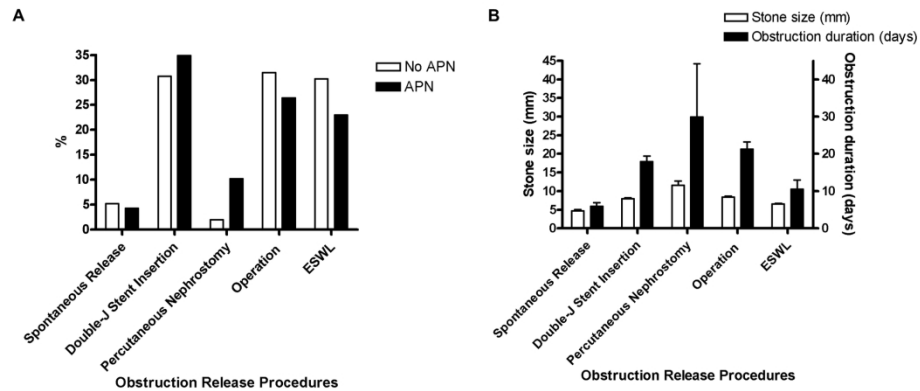

Figure 1: Performed obstruction release procedures by APN, stone size, and obstruction duration  
 (A) Percutaneous nephrostomy was performed more frequently in patients with APN compared to non-APN patients (10.2% vs. 2.0%).

(B) Stone size was significantly different according to the obstruction release method ( $p < 0.001$ ). Patients who had the obstruction released through percutaneous nephrostomy showed the longest obstruction duration.

199x149mm (300 x 300 DPI)

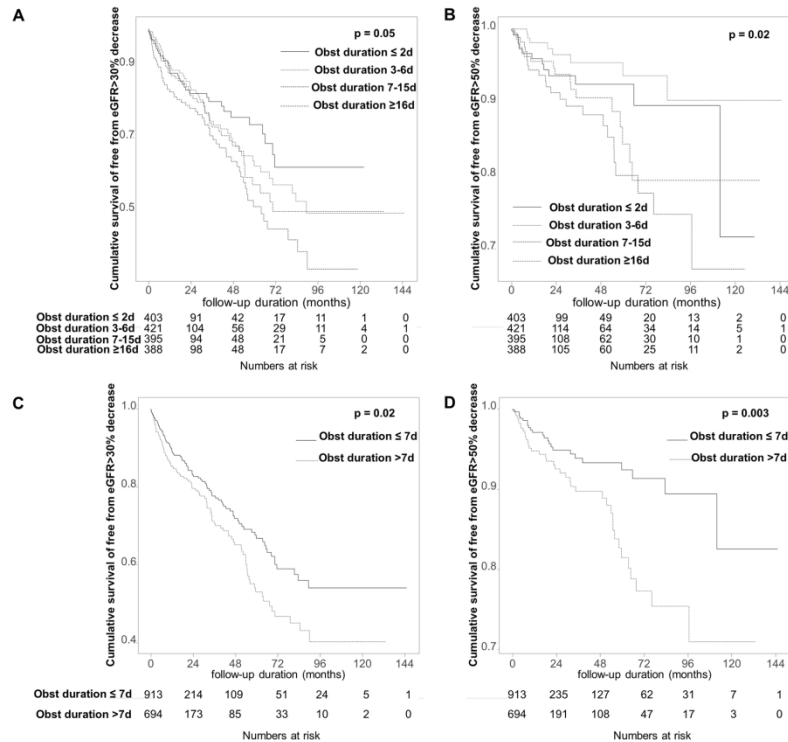

Figure 2: Kaplan-Meier curves for the renal outcomes

(A, B) When the prognosis was evaluated by the quartile of obstruction duration of all patients, the longer the obstruction duration, the greater the likelihood of a decrease in GFR of more than 30% ( $p=0.052$ , Figure 2A) and a decrease in GFR of more than 50% ( $p=0.016$ , Figure 2B)

(C, D) When we compare the results of the two groups, there was a significant increase in possibility of GFR reduction >30% ( $p=0.022$ , Figure 2C) and >50% ( $p=0.003$ , Figure 2D) in Group 2.

199x149mm (300 x 300 DPI)

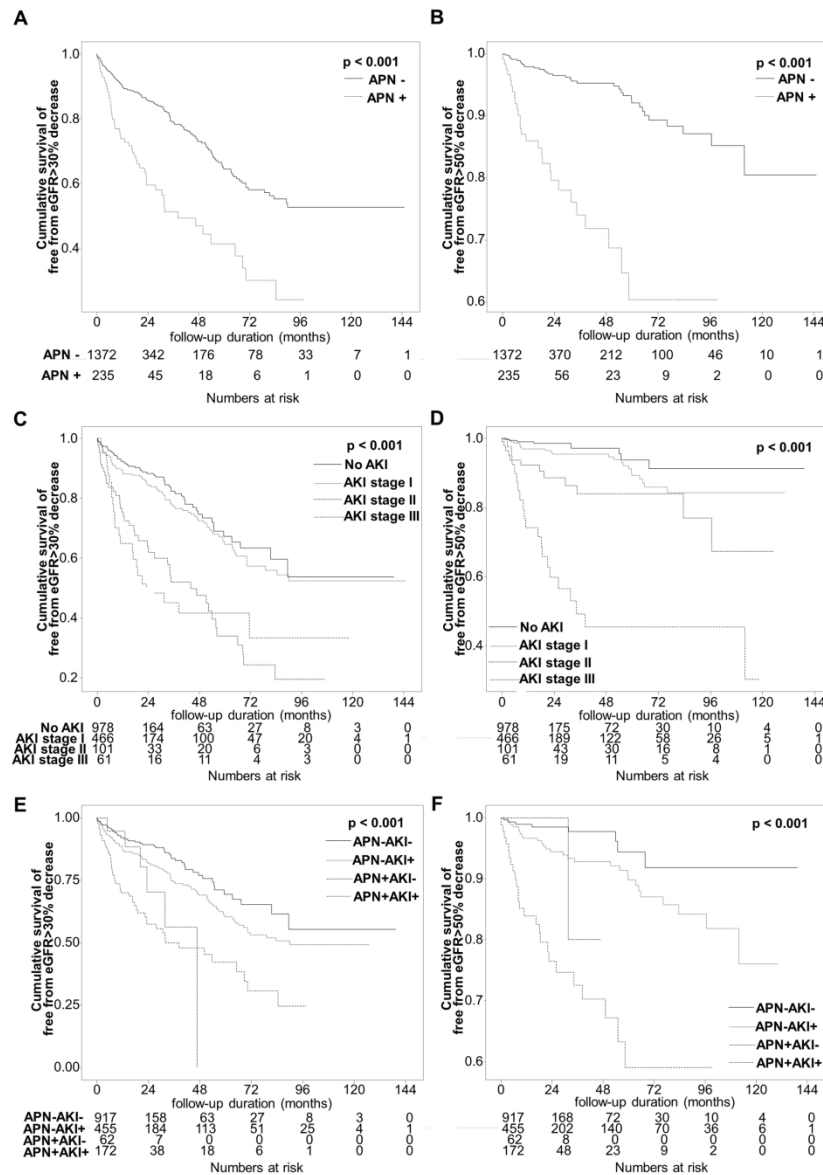

Figure 3: Kaplan–Meier curves for the renal outcomes by the occurrence of APN and/or AKI (A, B) The patients with APN were significantly more likely to have a GFR reduction >30% ( $p < 0.001$ , Figure 3A) and a GFR reduction >50% ( $p < 0.001$ , Figure 3B). (C, D) The patients with severe AKI of grade II or III, the probability of GFR reduction >30% ( $p < 0.001$ , Figure 3C) and >50% ( $p < 0.001$ , Figure 3D) were significantly higher than the others. (E, F) The prognosis was best when neither AKI nor APN was present, and the prognosis was progressively worse with AKI alone, APN alone, and both AKI and APN, consecutively ( $p < 0.001$ , Figure 3E, 3F).

199x266mm (300 x 300 DPI)



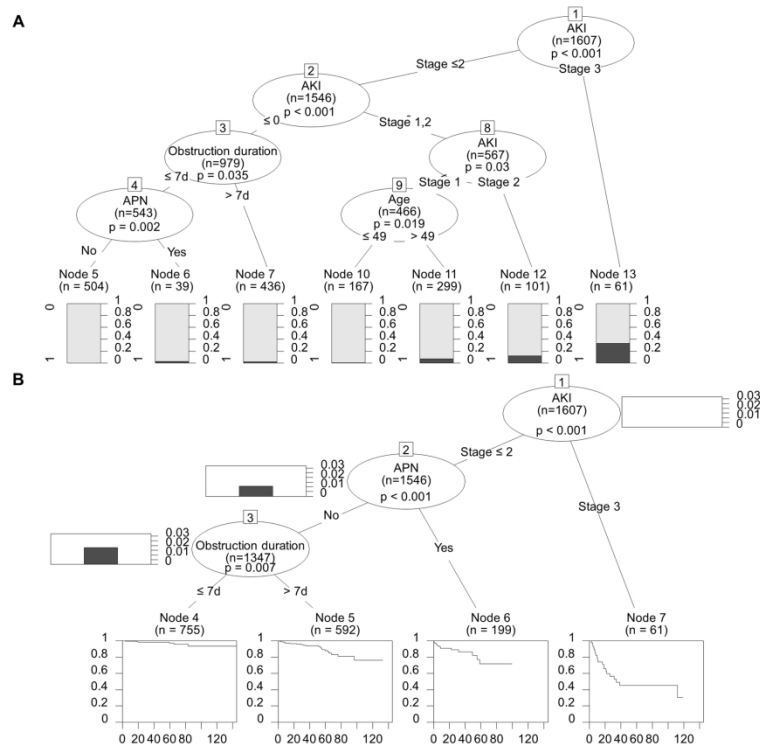

Figure 4. Tree analyses

(A) In a decision tree model, AKI was the most important risk factor for the GFR decrease >50% (p < 0.001).

The second most important risk factor was AKI stage II (p = 0.03). An age > 49 years at the time of obstructive uropathy was selected at the next node in the group of patients with AKI stage I (p = 0.019).

Concomitant APN during the obstruction episode was presented for the next node in the group of patients without AKI and obstruction duration is < 7 days (p = 0.002). An obstruction duration > 7 days was selected at the next node, in the group of patients without AKI (p = 0.035).

(B) In a survival tree analysis with the variables of sex, age, APN, AKI stage, and obstruction duration groups, AKI stage III (p < 0.001) was the most potent factor for the development of a GFR decrease > 50%; APN was the second highest factor (p < 0.001). An obstruction duration of more than 7 days (p = 0.007) was also an independent risk factor for major renal outcomes in the survival tree analysis.

199x149mm (300 x 300 DPI)

Table S1. Primary or secondary diagnosis of patients included in the screening list

| International Classification of Diseases-10 Codes | International Classification of Diseases-10 Diagnosis |
|---------------------------------------------------|-------------------------------------------------------|
| N200                                              | Calculus of kidney                                    |
| N200.01                                           | Nephrolithiasis, NOS                                  |
| N200.02                                           | Renal calculus or stone                               |
| N200.03                                           | Staghorn Calculus                                     |
| N200.04                                           | Stone in kidney                                       |
| N201                                              | Calculus of ureter                                    |
| N201.01                                           | Ureteric stone                                        |
| N201.02                                           | UPJ (ureteropelvic junction) stone                    |
| N201.03                                           | UVJ (ureterovesical junction) stone                   |
| N202                                              | Calculus of kidney with calculus of ureter            |
| N209                                              | Urinary calculus, unspecified                         |
| N209.01                                           | Calculous pyelonephritis                              |
| N210                                              | Calculus in bladder                                   |
| N210.02                                           | Urinary bladder stone                                 |
| N211                                              | Calculus in urethra                                   |
| N218                                              | Other lower urinary tract calculus                    |
| N219                                              | Calculus of lower urinary tract, unspecified          |

**STROBE 2007 (v4) Statement—Checklist of items that should be included in reports of *cohort studies***

| Section/Topic                | Item # | Recommendation                                                                                                                                                                       | Reported on page # |
|------------------------------|--------|--------------------------------------------------------------------------------------------------------------------------------------------------------------------------------------|--------------------|
| <b>Title and abstract</b>    | 1      | (a) Indicate the study's design with a commonly used term in the title or the abstract                                                                                               | 2                  |
|                              |        | (b) Provide in the abstract an informative and balanced summary of what was done and what was found                                                                                  | 2-3                |
| <b>Introduction</b>          |        |                                                                                                                                                                                      |                    |
| Background/rationale         | 2      | Explain the scientific background and rationale for the investigation being reported                                                                                                 | 4                  |
| Objectives                   | 3      | State specific objectives, including any prespecified hypotheses                                                                                                                     | 4                  |
| <b>Methods</b>               |        |                                                                                                                                                                                      |                    |
| Study design                 | 4      | Present key elements of study design early in the paper                                                                                                                              | 5                  |
| Setting                      | 5      | Describe the setting, locations, and relevant dates, including periods of recruitment, exposure, follow-up, and data collection                                                      | 5                  |
| Participants                 | 6      | (a) Give the eligibility criteria, and the sources and methods of selection of participants. Describe methods of follow-up                                                           | 5                  |
|                              |        | (b) For matched studies, give matching criteria and number of exposed and unexposed                                                                                                  | N/A                |
| Variables                    | 7      | Clearly define all outcomes, exposures, predictors, potential confounders, and effect modifiers. Give diagnostic criteria, if applicable                                             | 5-6                |
| Data sources/<br>measurement | 8*     | For each variable of interest, give sources of data and details of methods of assessment (measurement). Describe comparability of assessment methods if there is more than one group | 5,7                |
| Bias                         | 9      | Describe any efforts to address potential sources of bias                                                                                                                            | 13                 |
| Study size                   | 10     | Explain how the study size was arrived at                                                                                                                                            | 7                  |
| Quantitative variables       | 11     | Explain how quantitative variables were handled in the analyses. If applicable, describe which groupings were chosen and why                                                         | 7                  |
| Statistical methods          | 12     | (a) Describe all statistical methods, including those used to control for confounding                                                                                                | 7                  |
|                              |        | (b) Describe any methods used to examine subgroups and interactions                                                                                                                  | N/A                |
|                              |        | (c) Explain how missing data were addressed                                                                                                                                          | N/A                |
|                              |        | (d) If applicable, explain how loss to follow-up was addressed                                                                                                                       | N/A                |
|                              |        | (e) Describe any sensitivity analyses                                                                                                                                                | N/A                |
| <b>Results</b>               |        |                                                                                                                                                                                      |                    |

|                          |     |                                                                                                                                                                                                              |       |
|--------------------------|-----|--------------------------------------------------------------------------------------------------------------------------------------------------------------------------------------------------------------|-------|
| Participants             | 13* | (a) Report numbers of individuals at each stage of study—eg numbers potentially eligible, examined for eligibility, confirmed eligible, included in the study, completing follow-up, and analysed            | 7     |
|                          |     | (b) Give reasons for non-participation at each stage                                                                                                                                                         | 7     |
|                          |     | (c) Consider use of a flow diagram                                                                                                                                                                           | N/A   |
| Descriptive data         | 14* | (a) Give characteristics of study participants (eg demographic, clinical, social) and information on exposures and potential confounders                                                                     | 7-8   |
|                          |     | (b) Indicate number of participants with missing data for each variable of interest                                                                                                                          | N/A   |
|                          |     | (c) Summarise follow-up time (eg, average and total amount)                                                                                                                                                  | 8     |
| Outcome data             | 15* | Report numbers of outcome events or summary measures over time                                                                                                                                               | 9-10  |
| Main results             | 16  | (a) Give unadjusted estimates and, if applicable, confounder-adjusted estimates and their precision (eg, 95% confidence interval). Make clear which confounders were adjusted for and why they were included | 10    |
|                          |     | (b) Report category boundaries when continuous variables were categorized                                                                                                                                    | 8     |
|                          |     | (c) If relevant, consider translating estimates of relative risk into absolute risk for a meaningful time period                                                                                             | N/A   |
| Other analyses           | 17  | Report other analyses done—eg analyses of subgroups and interactions, and sensitivity analyses                                                                                                               | 10-11 |
| <b>Discussion</b>        |     |                                                                                                                                                                                                              |       |
| Key results              | 18  | Summarise key results with reference to study objectives                                                                                                                                                     | 11    |
| <b>Limitations</b>       |     |                                                                                                                                                                                                              |       |
| Interpretation           | 20  | Give a cautious overall interpretation of results considering objectives, limitations, multiplicity of analyses, results from similar studies, and other relevant evidence                                   | 13    |
| Generalisability         | 21  | Discuss the generalisability (external validity) of the study results                                                                                                                                        | 12-13 |
| <b>Other information</b> |     |                                                                                                                                                                                                              |       |
| Funding                  | 22  | Give the source of funding and the role of the funders for the present study and, if applicable, for the original study on which the present article is based                                                | 14    |

\*Give information separately for cases and controls in case-control studies and, if applicable, for exposed and unexposed groups in cohort and cross-sectional studies.

**Note:** An Explanation and Elaboration article discusses each checklist item and gives methodological background and published examples of transparent reporting. The STROBE checklist is best used in conjunction with this article (freely available on the Web sites of PLoS Medicine at <http://www.plosmedicine.org/>, Annals of Internal Medicine at <http://www.annals.org/>, and Epidemiology at <http://www.epidem.com/>). Information on the STROBE Initiative is available at [www.strobe-statement.org](http://www.strobe-statement.org).

# BMJ Open

## Concomitant Acute Pyelonephritis, Acute Kidney Injury, and Obstruction Duration Affects Renal Outcome in Obstructive Uropathy by Urolithiasis: Retrospective Cohort Study

|                                 |                                                                                                                                                                                                                                                                                                                                                                                                  |
|---------------------------------|--------------------------------------------------------------------------------------------------------------------------------------------------------------------------------------------------------------------------------------------------------------------------------------------------------------------------------------------------------------------------------------------------|
| Journal:                        | <i>BMJ Open</i>                                                                                                                                                                                                                                                                                                                                                                                  |
| Manuscript ID                   | bmjopen-2019-030438.R1                                                                                                                                                                                                                                                                                                                                                                           |
| Article Type:                   | Original research                                                                                                                                                                                                                                                                                                                                                                                |
| Date Submitted by the Author:   | 19-Jul-2019                                                                                                                                                                                                                                                                                                                                                                                      |
| Complete List of Authors:       | Lee, Eung Hyun; Chung-Ang University Hospital, Internal Medicine<br>Kim, Su-Hyun; Chung-Ang University Hospital, Internal Medicine<br>Shin, Jung-ho; Chung-Ang University Hospital, Internal Medicine<br>Park, Sung Bin; Chung-Ang University Hospital, Radiology<br>Chi, Byung Hoon ; Chung-Ang University Hospital, Urology<br>Hwang, Jin Ho; Chung-Ang University Hospital, Internal Medicine |
| <b>Primary Subject Heading</b>: | Renal medicine                                                                                                                                                                                                                                                                                                                                                                                   |
| Secondary Subject Heading:      | Urology                                                                                                                                                                                                                                                                                                                                                                                          |
| Keywords:                       | acute pyelonephritis, Chronic renal failure < NEPHROLOGY, Acute renal failure < NEPHROLOGY, nephrolithiasis, Urolithiasis < UROLOGY, obstructive uropathy                                                                                                                                                                                                                                        |
|                                 |                                                                                                                                                                                                                                                                                                                                                                                                  |

SCHOLARONE™  
Manuscripts

**Title Page**

Concomitant Acute Pyelonephritis, Acute Kidney Injury, and Obstruction Duration Affects  
Renal Outcome in Obstructive Uropathy by Urolithiasis: Retrospective Cohort Study

**Authors**

Eung Hyun Lee,<sup>1</sup> Su-Hyun Kim,<sup>1</sup> Jung-ho Shin,<sup>1</sup> Sung Bin Park,<sup>2</sup> Byung Hoon Chi,<sup>3</sup> Jin Ho  
Hwang,<sup>1,\*</sup>

**Affiliations**

<sup>1</sup>Department of Internal Medicine, Chung-Ang University Hospital, Seoul, Korea

<sup>2</sup>Department of Radiology, Chung-Ang University Hospital, Seoul, Korea

<sup>3</sup>Department of Urology, Chung-Ang University Hospital, Seoul, Korea

**Total Number of Tables: 5, Figures: 4**

**Word count: 3788**

**\*Addresses for Correspondence:**

Jin Ho Hwang, MD, PhD

Clinical Assistant Professor

Division of Nephrology, Department of Internal Medicine

Chung-Ang University Hospital

102 Heukseok-ro, Dongjak-gu, Seoul 06973, Republic of Korea

Tel. +82-2-6299-1447, Fax. +82-2-6299-2064

E-mail: dennyjinho@gmail.com

## Abstract

**Objective:** Urolithiasis-related obstructive uropathy is becoming one of the leading causes of chronic kidney disease, which is commonly encountered in the clinical field. Obstruction release from urolithiasis can be delayed, with a lack of suggested time for preventing the deterioration of renal function.

**Design:** Retrospective cohort study

**Setting & Participants:** 1607 patients from a urolithiasis-related obstructive uropathy cohort, between January 2005 and December 2015.

**Outcome measures:** eGFR decrease  $\geq 30\%$  and/or end-stage renal disease (ESRD), and eGFR decrease  $\geq 50\%$  and/or ESRD according to obstruction duration, acute kidney injury (AKI), and acute pyelonephritis (APN) accompanied by obstructive uropathy.

**Results:** When the prognosis was divided by the obstruction duration quartile, the longer the obstruction duration, the higher the probability of eGFR reduction  $>50\%$  ( $p=0.02$ ). In patients with concomitant APN or severe AKI during hospitalization with obstructive uropathy, an eGFR decrease of  $>30\%$  and  $>50\%$  occurred more frequently, compared to the others ( $p<0.001$ ). When we adjusted for sex, age, HT, DM, APN, AKI grades, and obstruction release  $>7$  days for multivariate analysis, we found that concomitant APN (HR 3.495, 95% CI 1.942–6.289;  $p<0.001$ ), concomitant AKI (HR 3.284, 95% CI 1.354–7.965,  $p=0.009$  for AKI stage II; HR 6.425, 95% CI 2.599–15.881,  $p<0.001$  for AKI stage III) and an obstruction duration  $>7$  days (HR 1.854, 95% CI 1.095–3.140,  $p=0.001$ ) were independently associated with an eGFR decrease  $>50\%$ . Tree analysis also showed that AKI grade 3, APN, and an obstruction duration  $>7$  days were the most important factors affecting the renal outcome.

**Conclusions:** In urolithiasis-related obstructive uropathy patients, concomitant APN was strongly associated with the deterioration of renal function after obstruction release. The elapsed time to release the obstruction also affected renal function.

1  
2  
3  
4  
5 **Keywords:** acute kidney injury; acute pyelonephritis; chronic kidney disease; kidney stone;  
6 nephrolithiasis; obstructive uropathy; prognosis; renal outcome; urinary tract obstruction;  
7  
8  
9 urolithiasis  
10  
11  
12  
13  
14  
15  
16  
17  
18  
19  
20  
21  
22  
23  
24  
25  
26  
27  
28  
29  
30  
31  
32  
33  
34  
35  
36  
37  
38  
39  
40  
41  
42  
43  
44  
45  
46  
47  
48  
49  
50  
51  
52  
53  
54  
55  
56  
57  
58  
59  
60

For peer review only



### Strengths and limitations of this study

- Considering the difficult characteristics of this study in performing a randomized controlled trial, it is possible to consider that lowering the incidence of AKI or APN through early obstruction release may have an additional benefit in improving prognosis, especially in patients with recurrent urolithiasis.
- There is a possibility that the symptom occurrence date was not an obstruction-specific date, and as evidence was required for the spontaneous resolution of obstruction release dates, the actual date may be later than the date on which the symptoms were relieved.
- The results cannot prove a causal relationship and the retrospective aspect of this study may introduce selection bias and mis-classification.

## Introduction

Urolithiasis-related obstructive uropathy is increasingly becoming one of the leading causes of chronic kidney disease (CKD), which is commonly encountered in the clinical field.<sup>1 2</sup> It occurs worldwide, but the incidence and prevalence can vary widely from country to country.<sup>2-7</sup> The differences are generally known to be affected by sex, age, regional characteristics (diet habit and environment), race, amount of water intake, obesity and other comorbidities.<sup>8-10</sup>

Urolithiasis is a cause of various discomforting symptoms, such as severe pain, hematuria, or lower urinary tract symptoms that worsen quality of life. In addition, it is associated with socioeconomic losses in various aspects as it often requires invasive treatment, such as intervention or surgery to remove stones, leading to the hospitalization of an economically active age population. Patients with urolithiasis commonly experience recurrent episodes of ureteral obstruction, or concomitant metabolic disorders such as hyperuricemia, diabetes mellitus or dyslipidemia.<sup>11</sup> Also, if obstructive uropathy by urolithiasis causes additional complications such as acute kidney injury (AKI) or infection, postobstructive diuresis, socioeconomic burden is further increased due to a longer hospital stay and CKD progression.<sup>12-16</sup> The incidence of acute renal injury due to renal stones has been reported to be 0.72–9.7%. Stone removal improves occlusion and restores renal function.<sup>17</sup> Therefore, early obstruction release is thought to have an important effect on prognosis, by preventing infections and renal dysfunction. However, obstruction release from urolithiasis can be easily delayed for various reasons in clinical practice, with a lack of suggested golden time for preventing the deterioration of renal function.

The purpose of this study was to investigate the effect of obstruction duration itself, due to urolithiasis, and the effect of concomitant AKI or acute pyelonephritis (APN) during the obstruction on the prognosis of renal function.

## Materials and Methods

### *Study Design and Patients*

A total of 2314 patients were screened and admitted to Chung-Ang University Hospital with urolithiasis (table S1) from January 2005 to December 2015. Of these patients, 1607 were eligible for analysis, excluding 707: no evidence of obstructive uropathy (259), obstruction onset date unknown (187), obstruction release date unknown (the symptom relieve date is not specified in spontaneous release, or there is no image evidence) (175), staghorn stone (55), pediatric patients (12), obstructive uropathy due to other causes besides a renal stone (11), and follow up loss after discharge (8). All the included patients were at least of 15 years of age, were admitted to the hospital because of obstructive uropathy due to urolithiasis, and were able to estimate the date of occurrence of the obstruction as the symptom date was recorded. Basic clinical parameters were collected, such as age at the time of admission, sex, underlying comorbidities (hypertension [HT], diabetes mellitus [DM], and alleged CKD), information about the laboratory findings (at the time of admission, peak c-reactive protein [CRP], the highest serum creatinine and the lowest estimated glomerular filtration rate [eGFR]), information about the urolithiasis (performed radiologic modality for diagnosis, obstruction site, obstruction side, selected procedure to release obstructive uropathy, stone size, and grade of hydronephrosis), the use of pain killers, and the outcome profiles (follow-up eGFR). This study was approved by Chung-Ang University Hospital Institutional Review Board (IRB number: 1810-008-16212) and the need for informed consent was waived as this study used a retrospective design. All clinical investigations were conducted in accordance with the guidelines of the 2013 Declaration of Helsinki.

### **Measurement and definition of parameters**

Obstruction duration was calculated as the difference between the documented symptom

1  
2  
3 onset date and the date on which the obstruction was directly resolved by procedure, or from  
4  
5 the date on which the pain was markedly improved, in the spontaneous release patients.  
6  
7

8 Concomitant APN was defined as the presence of APN diagnosis in the medical  
9  
10 records or the use of antibiotics for urinary tract infection treatment for more than 7 days, in  
11  
12 patients with CRP >10 mg/L.  
13  
14

15 All serum creatinine and eGFR data were collected before, during, and after  
16  
17 admission, to confirm baseline renal function and AKI during hospitalization. AKI was  
18  
19 defined by serum creatinine change, as described in the Kidney Disease: Improving Global  
20  
21 Outcomes (KDIGO) clinical practice guideline:<sup>18</sup> AKI was diagnosed when there was an  
22  
23 abrupt reduction in kidney function, with an absolute increase in serum creatinine (SCr) level  
24  
25 by  $\geq 0.3$  mg/dL within 48 hours, and/or an increase of more than 1.5-fold from the baseline  
26  
27 SCr level within 7 days. Then, AKI stages were further evaluated as follows: AKI stage I, an  
28  
29 increase in SCr 1.5–1.9 times from baseline, or by  $\geq 0.3$  mg/dL; AKI stage II, an increase in  
30  
31 SCr of 2.0–2.9 times from baseline; AKI stage III, an increase in SCr more than 3.0 times  
32  
33 from baseline,  $\geq 4.0$  mg/dL, or the initiation of renal replacement therapy. Urine output  
34  
35 criteria were not considered due to the inaccuracy of the data, which should be collected  
36  
37 retrospectively.  
38  
39  
40  
41

42 The size of the renal stone causing the occlusion was measured, with the longest  
43  
44 diameter as the most accurate image modality of each patient. Hydronephrosis was divided  
45  
46 into the four grades of I-IV, with reference to existing literature.<sup>19</sup> Grade I, dilation of the  
47  
48 renal pelvis without dilatation of the calices; Grade II, dilation of the renal pelvis and calices,  
49  
50 that become convex, and no signs of cortical thinning; Grade III, the presence of cortical  
51  
52 thinning; Grade IV, massive dilation of the renal pelvis and calices, with severe cortical  
53  
54 thinning.  
55  
56  
57  
58  
59  
60

### ***Primary and Secondary Objectives***

The primary objective of this study was to evaluate whether the duration of urinary tract obstruction affects the renal outcome. The secondary objective was to evaluate whether the AKI, APN or both events affect the renal outcome. Renal outcomes were evaluated with an eGFR decrease  $\geq 30\%$  and/or end-stage renal disease (ESRD), and an eGFR decrease  $\geq 50\%$  and/or ESRD. Each renal outcome was collected from an event that occurred 3 months after discharge from obstructive uropathy.

### ***Statistical Analysis***

The analyses and calculations in this study were performed using SPSS Statistics V20.0 (IBM Corporation, Armonk, NY, USA), and R version 3.4.4 (R Foundation for Statistical Computing, Vienna, Austria). Continuous variables did not satisfy normality tests, so nonparametric tests (Mann-Whitney  $U$ ) were performed and median (min-max) was provided. For categorical variables, data were expressed as number (percentage) and compared using the Chi-squared test. Renal outcome-free survival rates were also performed, using the Kaplan-Meier method, and comparison between groups was performed using the log-rank test. Building tree-based regression and classification models (decision and survival tree analysis) were performed by recursive partitioning using party package. Input variables were age, sex, APN, AKI stages, and obstruction duration-based groups.

. The Cox proportional hazard model was used to identify independent risk factors for the renal outcome, and to calculate the HR and 95% CI. Statistical significance was set at the level of  $p < 0.05$ .

### ***Patient and public involvement***

Patients were not involved in the design of this analysis.

## Results

### *Baseline Data by Obstruction Duration*

From January 2005 to December 2015, a total of 2314 patients with urinary tract stone disease were identified, and a total of 1607 patients were confirmed suitable for analysis. The baseline characteristics of 1607 enrolled patients are described in table 1.

Table 1. Characteristics according to obstruction duration

|                                                 | Obstruction duration<br>≤ 7 days<br>(Group 1, n=913) | Obstruction duration<br>> 7 days<br>(Group 2, n=694) | Total<br>(N=1607)    |
|-------------------------------------------------|------------------------------------------------------|------------------------------------------------------|----------------------|
| Male Gender, n (%)                              | 538 (58.9%)                                          | 435 (62.7%)                                          | 973 (60.5%)          |
| Age (years old)                                 | 52 (39-62)                                           | 56 (45-67)                                           | 54 (41-64)           |
| Hypertension, n (%)                             | 220 (24.1%)                                          | 273 (39.3%)                                          | 493 (30.7%)          |
| Diabetes mellitus, n (%)                        | 114 (12.5%)                                          | 156 (22.5)                                           | 270 (16.8%)          |
| Chronic kidney disease, n (%)                   | 14 (1.5%)                                            | 16 (2.3%)                                            | 30 (1.9%)            |
| Obstruction release procedure, n (%)            |                                                      |                                                      |                      |
| Spontaneous release                             | 71 (7.7%)                                            | 17 (2.5%)                                            | 88 (5.4%)            |
| Double-J stenting                               | 269 (29.5%)                                          | 236 (34.0%)                                          | 505 (31.4%)          |
| Percutaneous nephrostomy                        | 31 (3.4%)                                            | 21 (3.0%)                                            | 52 (3.2%)            |
| Operation (stone removal)                       | 206 (22.6%)                                          | 288 (41.5%)                                          | 494 (30.7%)          |
| ESWL                                            | 336 (36.8%)                                          | 132 (19.0%)                                          | 468 (29.1%)          |
| Obstruction duration (days)                     | 3.0 (3.0-5.0)                                        | 18.0 (11.0-31.3)                                     | 6.0 (2.0-15.0)       |
| Baseline sCr (mg/dL)                            | 0.80 (0.42-0.96)                                     | 0.80 (0.66-1.00)                                     | 0.80 (0.65-0.98)     |
| Baseline eGFR<br>(ml/min/1.73m <sup>2</sup> )*  | 94.89 (78.66-113.66)                                 | 91.67 (74.68-112.77)                                 | 93.62 (77.00-113.43) |
| sCr at admission (mg/dL)                        | 1.00 (0.80-1.25)                                     | 1.00 (0.80-1.20)                                     | 1.00 (0.80-1.21)     |
| eGFR at admission (ml/min/1.73m <sup>2</sup> )* | 74.14 (58.15-91.37)                                  | 74.76 (57.19-90.92)                                  | 74.54 (57.81-91.25)  |

## Performed imaging modality for diagnosis, n (%)

|                     |             |             |             |
|---------------------|-------------|-------------|-------------|
| KUB                 | 43 (4.7%)   | 75 (10.8%)  | 118 (7.3%)  |
| Kidney sonography   | 11 (1.2%)   | 6 (0.9%)    | 17 (1.1%)   |
| Computed tomography | 696 (76.2%) | 493 (71.0%) | 1189 (74%)  |
| IVP                 | 163 (17.9%) | 120 (17.3%) | 283 (17.6%) |

## Hydronephrosis grade, n (%)

|                             |             |             |             |
|-----------------------------|-------------|-------------|-------------|
| Grade 0 (No hydronephrosis) | 179 (20.9%) | 141 (23.0%) | 320 (21.8%) |
| Grade 1                     | 202 (23.6%) | 115 (18.8%) | 317 (21.6%) |
| Grade 2                     | 365 (42.6%) | 172 (28.1%) | 537 (36.6%) |
| Grade 3                     | 94 (11.0%)  | 117 (19.1%) | 211 (14.4%) |
| Grade 4                     | 17 (2.0%)   | 67 (11.0%)  | 94 (5.8%)   |

## Obstruction side

|           |             |             |             |
|-----------|-------------|-------------|-------------|
| Left      | 456 (50.2%) | 328 (47.7%) | 784 (49.1%) |
| Right     | 393 (43.3%) | 300 (43.6%) | 693 (43.4%) |
| Bilateral | 35 (3.8%)   | 26 (3.8%)   | 61 (3.8%)   |
| Undefined | 24 (2.6%)   | 34 (4.9%)   | 58 (3.7%)   |

## Stone size (mm)

|               |                |               |
|---------------|----------------|---------------|
| 5.6 (4.3-7.7) | 7.7 (5.6-10.9) | 6.5 (4.8-9.0) |
|---------------|----------------|---------------|

## Pain killer, n (%)

|                     |             |             |             |
|---------------------|-------------|-------------|-------------|
| No use              | 169 (18.5%) | 159 (22.9%) | 328 (20.4%) |
| NSAIDs (Old)        | 293 (32.1%) | 195 (28.1%) | 488 (30.4%) |
| NSAIDs (New)        | 389 (42.6%) | 303 (43.7%) | 692 (43.1%) |
| Narcotic analgesics | 62 (6.8%)   | 37 (5.3%)   | 99 (6.2%)   |

---

\*eGFR was calculated using the IDMS-MDRD equation (ml/min/1.73 m<sup>2</sup>).

Abbreviations: ESWL, Electrocoporeal Shock Wave Lithotripsy; sCr, serum creatinine; eGFR, estimated glomerular filtration rate; KUB, kidney ureter bladder x-ray; IVP, intravenous pyelogram; NSAIDs: Non-steroidal anti-inflammatory drugs

1  
2  
3 Obstruction duration was at least 0 days (obstruction release at the day of symptom  
4 onset), with the maximum being 1099 days, the median obstruction duration was 6 days  
5 (interquartile range 2–15 days), and the mean obstruction duration was 16.6 days. APN due  
6 to obstruction was observed in 14.6% of patients and the mean CRP value of the patients with  
7 APN was 54.8 mg/L. Patients with HT, DM, and CKD had significantly higher rates of APN  
8 (19.3% in HT, 23% in DM, and 43.3% in CKD), accompanied by obstructive uropathy. AKI  
9 was observed in 629 patients (39.1%): 467 (74.2%) were stage I, 101 (16.1%) were stage II,  
10 and 61 (9.7%) were stage III. Non-steroidal anti-inflammatory drugs (NSAIDs) were  
11 prescribed for pain control in 73.5% of patients. The mean follow-up duration of patients was  
12 18.4 months.

13  
14  
15 When comparing obstruction release time within 7 days (group 1) and obstruction  
16 release time over 7 days (group 2), the group 2 patients were older and the prevalence of  
17 HTN and type 2 DM were significantly higher. No significant differences were found in  
18 serum Cr and eGFR values between the two groups at the time of admission of obstructive  
19 uropathy due to urolithiasis.

20  
21  
22 In group 1, 7.4% of patients were spontaneously released, whereas only 1.9% were  
23 spontaneously released in the group 2 patients. Percutaneous nephrostomy was performed  
24 more frequently in APN than in non-APN patients (10.2% vs. 2.0%, figure 1).

25  
26  
27 The stone size was significantly different according to the obstruction release  
28 method, as it was  $4.7 \pm 2.8$  mm in the spontaneous release group and  $11.6 \pm 7.9$  mm in the  
29 percutaneous nephrostomy group (figure 1B). Group 1 patients were more likely to take  
30 computed tomography with diagnostic modality and hydronephrosis less than grade II.

### 31 32 33 ***Baseline Data of Subcategorization by APN and/or AKI***

34  
35  
36 The baseline characteristics of the 1607 patients subcategorized by APN and/or AKI are



1  
2  
3 described in table 2. In group 1 patients, obstruction duration tended to be longer in patients  
4  
5 with complications. However, in group 2, obstruction duration was longer in patients without  
6  
7 complications. In both groups 1 and 2, the prevalence of underlying diseases such as HT, DM  
8  
9 and baseline CKD was higher in patients with AKI. NSAID was the most commonly used  
10  
11 analgesic in these patients. However, only those with both APN and AKI had more narcotic  
12  
13 analgesics prescriptions. Patients with AKI showed a lower initial eGFR compared to patients  
14  
15 without AKI at the time of admission. People who had the obstruction released within 7 days  
16  
17 and people with complications (APN or AKI) tended to have a larger stone size, but those  
18  
19 with the obstruction released after more than 7 days did not show any correlation.  
20  
21  
22  
23  
24  
25  
26  
27  
28  
29  
30  
31  
32  
33  
34  
35  
36  
37  
38  
39  
40  
41  
42  
43  
44  
45  
46  
47  
48  
49  
50  
51  
52  
53  
54  
55  
56  
57  
58  
59  
60

Table 2. Characteristics according to obstruction duration &amp; AKI/APN

|                                      | Obstruction duration $\leq$ 7 days (Group 1) |                     |                    |                     | Obstruction duration $>$ 7 days (Group 2) |                     |                    |                    |
|--------------------------------------|----------------------------------------------|---------------------|--------------------|---------------------|-------------------------------------------|---------------------|--------------------|--------------------|
|                                      | APN-AKI-<br>(N=504)                          | APN-AKI+<br>(N=267) | APN+AKI-<br>(N=38) | APN+AKI+<br>(N=103) | APN-AKI-<br>(N=413)                       | APN-AKI+<br>(N=188) | APN+AKI-<br>(N=24) | APN+AKI+<br>(N=69) |
| Male Gender                          | 287 (56.9%)                                  | 182 (68.2%)         | 13 (34.2%)         | 55 (53.4%)          | 251 (60.8%)                               | 135 (71.8%)         | 10 (41.7%)         | 39 (56.5%)         |
| Age                                  | 48.0 (37.0-58.0)                             | 55.0 (42.0-65.0)    | 52.5 (39.0-69.0)   | 60.0 (50.0-69.5)    | 54.0 (43.0-63.0)                          | 59.0 (48.0-67.0)    | 55.5 (40.5-67.5)   | 67.0 (56.0-76.0)   |
| Obstruction release procedure, n (%) |                                              |                     |                    |                     |                                           |                     |                    |                    |
| Spontaneous release                  | 46 (9.1%)                                    | 16 (6.0%)           | 4 (10.5%)          | 5 (4.9%)            | 10 (2.3%)                                 | 4 (2.2%)            | 0 (0.0%)           | 3 (4.4%)           |
| Double-J stenting                    | 142 (28.2%)                                  | 78 (29.2%)          | 11 (29.0%)         | 38 (36.9%)          | 139 (33.7%)                               | 63 (33.5%)          | 11 (45.8%)         | 23 (33.3%)         |
| PCN                                  | 8 (1.6%)                                     | 6 (2.3%)            | 0 (0.0%)           | 17 (16.5%)          | 7 (1.7%)                                  | 8 (4.3%)            | 1 (4.2%)           | 5 (7.3%)           |
| Operation (stone removal)            | 106 (21.0%)                                  | 66 (24.7%)          | 14 (36.8%)         | 20 (19.4%)          | 182 (44.1%)                               | 78 (41.5%)          | 6 (25.0%)          | 22 (31.9%)         |
| ESWL                                 | 202 (40.1%)                                  | 101 (37.8%)         | 9 (23.7%)          | 23 (22.3%)          | 75 (18.2%)                                | 35 (18.6%)          | 6 (25.0%)          | 16 (23.2%)         |
| Obstruction duration                 | 3.0 (1.0-5.0)                                | 3.0 (1.5-4.0)       | 4.0 (2.0-6.0)      | 4.0 (2.0-5.0)       | 21.0 (12.0-33.0)                          | 15.0 (10.0-30.0)    | 16.0 (10.0-27.0)   | 15.0 (10.0-27.0)   |
| Hypertension                         | 87 (17.3%)                                   | 85 (31.8%)          | 10 (26.3%)         | 38 (36.9%)          | 137 (33.2%)                               | 88 (46.8%)          | 7 (29.2%)          | 41 (59.4%)         |
| Diabetes mellitus                    | 37 (7.3%)                                    | 47 (17.6%)          | 4 (10.5%)          | 26 (25.2%)          | 67 (16.2%)                                | 57 (30.3%)          | 4 (16.7%)          | 28 (40.6%)         |
| Chronic kidney disease               | 0 (0.0%)                                     | 7 (2.6%)            | 0 (0.0%)           | 7 (6.8%)            | 2 (0.5%)                                  | 7 (3.7%)            | 1 (4.2%)           | 6 (8.7%)           |
| Pain killer                          |                                              |                     |                    |                     |                                           |                     |                    |                    |
| No use                               | 59 (11.7%)                                   | 60 (22.5%)          | 9 (23.7%)          | 41 (39.8%)          | 58 (14.0%)                                | 58 (30.9%)          | 7 (29.2%)          | 36 (52.2%)         |
| NSAIDs (Old)                         | 20 (4.0%)                                    | 19 (7.1%)           | 5 (13.2%)          | 18 (17.5%)          | 17 (4.1%)                                 | 10 (5.3%)           | 1 (4.2%)           | 9 (13.0%)          |
| NSAIDs (New)                         | 251 (49.8%)                                  | 100 (37.5%)         | 17 (44.7%)         | 21 (20.4%)          | 214 (51.8%)                               | 70 (37.2%)          | 9 (37.5%)          | 10 (14.5%)         |
| Narcotic analgesics                  | 174 (34.5%)                                  | 88 (33.0%)          | 7 (18.4%)          | 23 (22.3%)          | 124 (30.0%)                               | 50 (26.6%)          | 7 (29.2%)          | 14 (20.3%)         |
| Baseline sCr (mg/dL)                 | 0.8 (0.7-0.9)                                | 0.8 (0.7-1.0)       | 0.7 (0.5-0.8)      | 0.8 (0.6-1.0)       | 0.8 (0.7-1.0)                             | 0.8 (0.7-1.0)       | 0.8 (0.6-1.0)      | 0.9 (0.6-1.2)      |

|                                                    |                   |                   |                    |                   |                   |                   |                   |                   |
|----------------------------------------------------|-------------------|-------------------|--------------------|-------------------|-------------------|-------------------|-------------------|-------------------|
| Baseline eGFR<br>(ml/min/1.73m <sup>2</sup> )*     | 96.6 (81.0-112.9) | 91.4 (74.5-113.8) | 105.2 (89.7-126.4) | 93.7 (73.4-111.3) | 94.0 (79.1-113.7) | 91.3 (68.7-114.9) | 92.4 (69.1-109.2) | 79.1 (59.6-103.4) |
| sCr at admission<br>(mg/dL)                        | 0.9 (0.7-1.0)     | 1.2 (1.0-1.5)     | 0.8 (0.7-1.0)      | 1.4 (1.1-1.7)     | 0.9 (0.7-1.0)     | 1.2 (1.0-1.6)     | 0.9 (0.7-1.1)     | 1.6 (1.1-2.0)     |
| eGFR at admission<br>(ml/min/1.73m <sup>2</sup> )* | 85.6 (73.7-99.7)  | 58.0 (46.7-69.1)  | 80.6 (68.6-100.2)  | 48.4 (34.1-63.9)  | 83.5 (71.8-100.7) | 57.6 (43.9-73.5)  | 75.6 (59.5-91.9)  | 40.9 (31.0-61.6)  |
| Performed imaging modality for diagnosis, n (%)    |                   |                   |                    |                   |                   |                   |                   |                   |
| KUB                                                | 3 (6.0%)          | 10 (3.8%)         | 1 (2.6%)           | 2 (1.9%)          | 47 (11.4%)        | 26 (13.8%)        | 0 (0.0%)          | 2 (2.9%)          |
| Kidney<br>sonography                               | 8 (1.6%)          | 3 (1.1%)          | 0 (0.0%)           | 0 (0.0%)          | 4 (1.0%)          | 1 (0.5%)          | 0 (0.0%)          | 1 (1.5%)          |
| CT                                                 | 368 (73.0%)       | 198 (74.2%)       | 35 (92.1%)         | 94 (91.3%)        | 283 (68.5%)       | 128 (68.1%)       | 21 (87.5%)        | 61 (88.4%)        |
| IVP                                                | 98 (19.4%)        | 56 (21.0%)        | 2 (5.3%)           | 7 (6.8%)          | 79 (19.1%)        | 33 (17.6%)        | 3 (12.5%)         | 5 (7.3%)          |
| Hydronephrosis grade                               |                   |                   |                    |                   |                   |                   |                   |                   |
| No<br>hydronephrosis                               | 127 (25.2%)       | 37 (13.9%)        | 4 (10.5%)          | 11 (10.7%)        | 97 (23.5%)        | 28 (14.9%)        | 7 (29.2%)         | 9 (13.0%)         |
| Grade 1                                            | 116 (23.0%)       | 55 (20.6%)        | 12 (31.6%)         | 19 (18.5%)        | 65 (15.7%)        | 34 (18.1%)        | 3 (12.5%)         | 13 (18.8%)        |
| Grade 2                                            | 178 (35.3%)       | 120 (44.9%)       | 18 (47.4%)         | 48 (46.6%)        | 98 (23.7%)        | 48 (25.5%)        | 6 (25.0%)         | 20 (29.0%)        |
| Grade 3                                            | 39 (7.7%)         | 34 (12.7%)        | 3 (7.9%)           | 18 (17.5%)        | 66 (16.0%)        | 30 (16.0%)        | 6 (25.0%)         | 16 (23.2%)        |
| Grade 4                                            | 7 (1.4%)          | 5 (1.9%)          | 1 (2.6%)           | 4 (3.9%)          | 36 (8.7%)         | 22 (11.7%)        | 0 (0.0%)          | 8 (11.6%)         |
| Obstruction side                                   |                   |                   |                    |                   |                   |                   |                   |                   |
| Left                                               | 252 (50.4%)       | 132 (49.6%)       | 21 (55.3%)         | 50 (48.5%)        | 190 (46.3%)       | 92 (49.7%)        | 12 (50.0%)        | 34 (49.3%)        |
| Right                                              | 210 (42.0%)       | 121 (45.5%)       | 13 (34.2%)         | 49 (47.6%)        | 179 (43.7%)       | 76 (41.1%)        | 11 (45.8%)        | 34 (49.3%)        |
| Bilateral                                          | 4 (0.8%)          | 5 (1.9%)          | 2 (5.3%)           | 3 (2.9%)          | 9 (2.2%)          | 4 (2.2%)          | 0 (0.0%)          | 0 (0.0%)          |
| Undefined                                          | 19 (3.8%)         | 5 (1.9%)          | 0 (0.0%)           | 0 (0.0%)          | 23 (5.6%)         | 10 (5.4%)         | 1 (4.2%)          | 0 (0.0%)          |
| Stone size (mm)                                    | 5.3 (4.1-7.34)    | 6.0 (4.6-7.7)     | 6.0 (4.8-6.9)      | 6.1 (4.8-8.9)     | 7.6 (5.6-10.7)    | 8.4 (5.8-12.0)    | 6.3 (4.1-9.4)     | 8.2 (6.2-10.0)    |

\*eGFR was calculated using the IDMS-MDRD equation (ml/min/1.73 m<sup>2</sup>).

1  
2  
3  
4  
5  
6  
7  
8  
9  
10  
11  
12  
13  
14  
15  
16  
17  
18  
19  
20  
21  
22  
23  
24  
25  
26  
27  
28  
29  
30  
31  
32  
33  
34  
35  
36  
37  
38  
39  
40  
41  
42  
43  
44  
45  
46

Abbreviations: PCN, Percutaneous nephrostomy; ESWL, Electrocorporeal Shock Wave Lithotripsy; sCr, serum creatinine; eGFR, estimated glomerular filtration rate; KUB, kidney ureter bladder x-ray; CT, computed tomography; IVP, intravenous pyelogram; NSAIDs: Non-steroidal anti-inflammatory drugs

For peer review only

### Outcome by Obstruction Duration

In this study, APN occurred more frequently in group 2 patients compared to group 1 (29.3% vs. 10.2%,  $p < 0.001$ ). The last serum creatinine (0.86 vs. 0.90 mg/dL,  $p = 0.004$ ) and eGFR (87 vs. 81 ml/min/1.73 m<sup>2</sup>,  $p = 0.001$ ) also showed worse renal function in group 2 patients (table 3).

Table 3. Outcome variables by obstruction duration

|                                                               | Obstruction<br>duration<br>≤ 7 days<br>(Group 1, n=913) | Obstruction<br>duration<br>> 7 days<br>(Group 2, n=694) | Total<br>(N=1607) | P      |
|---------------------------------------------------------------|---------------------------------------------------------|---------------------------------------------------------|-------------------|--------|
| Acute pyelonephritis, n (%)                                   | 24 (10.2%)                                              | 46 (29.3%)                                              | 235 (14.6%)       | <0.001 |
| Peak CRP (mg/L)                                               | 3.3 (0.8-42.3)                                          | 31.3 (1.7-145.0)                                        | 5.9 (1.0-73.3)    | <0.001 |
| Peak sCr during admission (mg/dL)                             | 1.0 (0.8-1.3)                                           | 1.0 (0.8-1.3)                                           | 1.0 (0.8-1.3)     | 0.454  |
| Lowest eGFR during admission<br>(ml/min/1.73m <sup>2</sup> )* | 72.4 (56.1-89.6)                                        | 71.9 (53.4-88.6)                                        | 72.0 (55.1-89.0)  | 0.307  |
| AKI                                                           |                                                         |                                                         |                   |        |
| no AKI                                                        | 542 (59.4%)                                             | 436 (62.8%)                                             | 978 (60.9%)       | 0.491  |
| KDIGO stage I                                                 | 274 (30.0%)                                             | 192 (27.7%)                                             | 466 (29.0%)       |        |
| KDIGO stage II                                                | 62 (6.8%)                                               | 39 (5.6%)                                               | 101 (6.3%)        |        |
| KDIGO stage III                                               | 34 (3.7%)                                               | 27 (3.9%)                                               | 61 (3.8%)         |        |
| GFR 30% reduction, n (%)                                      | 100 (11.0%)                                             | 105 (15.1%)                                             | 205 (12.8%)       | 0.016  |
| GFR 50% reduction, n (%)                                      | 24 (2.6%)                                               | 39 (5.6%)                                               | 63 (3.9%)         | 0.003  |
| Final sCr (mg/dL)                                             | 0.9 (0.7-1.1)                                           | 0.9 (0.7-1.1)                                           | 0.9 (0.7-1.1)     | 0.004  |
| Final eGFR (ml/min/1.73m <sup>2</sup> )*                      | 87.0 (71.1-102.4)                                       | 81.0 (64.0-100.5)                                       | 84.4 (68.3-101.1) | 0.001  |
| ΔGFR/yr                                                       | 2.5 (0.0-35.8)                                          | 5.7 (0.0-162.8)                                         | 4.0 (0.0-78.5)    | 0.004  |

\*eGFR was calculated using the IDMS-MDRD equation (ml/min/1.73 m<sup>2</sup>).

Abbreviations: CRP, C-reactive protein; sCr, serum creatinine; eGFR, estimated glomerular filtration rate; AKI, acute kidney injury; KDIGO, Kidney Disease: Improving Global Outcomes

1  
2  
3 When the prognosis was evaluated by the quartile of obstruction duration of all  
4 patients, the longer the obstruction duration, the greater the likelihood of a decrease in GFR  
5 more than 30% (log-rank p for pooled analysis=0.052, pairwise analysis; p=0.009 for 1Q vs.  
6 3Q, p=0.037 for 2Q vs. 3Q, figure 2A), and a decrease in GFR of more than 50% (log-rank p  
7 for pooled analysis=0.016, pairwise analysis; p=0.002 for 2Q vs. 3Q, p=0.022 for 2Q vs. 4Q,  
8 figure 2B) respectively. When we compare the results of the two groups, there was a  
9 significant increase in the possibility of GFR reduction >30% (log-rank p=0.022, HR 1.38,  
10 95% CI 1.05-1.81, figure 2C) and >50% (log-rank p=0.003, HR 2.12, 95% CI 1.27-3.53,  
11 figure 2D) in Group 2 (figure 2).

### 25 26 ***Outcome by APN and/or AKI***

27  
28 Patients who did not have APN or AKI in Group 1 had no events, with a GFR reduction of  
29 more than 50% (table 4).

30  
31  
32  
33 When examining the effect of APN during hospitalization with obstructive uropathy  
34 on renal outcome, patients with APN were significantly more likely to have a GFR reduction  
35 >30% (log-rank p<0.001, HR 2.61, 95% CI 1.91-3.56, figure 3A) and a GFR reduction >50%  
36 (log-rank p<0.001, HR 5.81, 95% CI 3.50-9.63, figure 3B).

37  
38  
39  
40  
41  
42 When we examined the renal outcome according to the extent of AKI during  
43 hospitalization, AKI stage I showed a favorable outcome. However, patients with severe AKI  
44 of grade II or III, the probability of GFR reduction >30% (log-rank p for pooled analysis  
45 <0.001, HR 1.58, 95% CI 1.37-1.82, pairwise analysis; p<0.001 for No AKI vs. AKI stage II  
46 or III, and AKI stage I vs. stage II or III, figure 3C) and >50% (log-rank p for pooled analysis  
47 <0.001, HR 2.62, 95% CI 2.05-3.34, pairwise analysis; p<0.001 for No AKI vs. AKI stage II  
48 or III, p=0.035 for AKI stage I vs. II, p<0.001 for AKI stage I vs. III, p=0.001 for AKI stage  
49 II vs. III, figure 3D) was significantly higher than the others.

1  
2  
3 The prognosis was best when neither AKI nor APN was present, and the prognosis  
4 was progressively worse with AKI alone, APN alone and both AKI and APN, consecutively  
5 (log-rank p for pooled analysis <0.001, HR 1.50, 95% CI 1.33-1.71, pairwise analysis:  
6 p=0.029 for AKI(-)APN(-) vs. AKI(+), p=0.027 for AKI(-)APN(-) vs. APN(+), p<0.001 for  
7 AKI(-)APN(-) vs. AKI(+)APN(+), and p<0.001 for AKI(+) vs. AKI(+)APN(+), figure 3E;  
8 log-rank p<0.001 for pooled analysis, HR 2.18, 95% CI 1.75-2.71, pairwise analysis: p=0.024  
9 for AKI(-)APN(-) vs. AKI(+), p<0.001 for AKI(-)APN(-) vs. AKI(+)APN(+), and p<0.001  
10 AKI(+) vs. AKI(+)APN(+), figure 3F).  
11  
12  
13  
14  
15  
16  
17  
18  
19  
20  
21  
22  
23  
24  
25  
26  
27  
28  
29  
30  
31  
32  
33  
34  
35  
36  
37  
38  
39  
40  
41  
42  
43  
44  
45  
46  
47  
48  
49  
50  
51  
52  
53  
54  
55  
56  
57  
58  
59  
60

Table 4. Outcomes according to the obstruction duration &amp; AKI/APN

|                                              | Obstruction duration ≤ 7 days (Group 1) |                      |                       |                       | P      | Obstruction duration > 7 days (Group 2) |                      |                       |                        | P      |
|----------------------------------------------|-----------------------------------------|----------------------|-----------------------|-----------------------|--------|-----------------------------------------|----------------------|-----------------------|------------------------|--------|
|                                              | APN-AKI-<br>(N=504)                     | APN-AKI+<br>(N=267)  | APN+AKI-<br>(N=38)    | APN+AKI+<br>(N=103)   |        | APN-AKI-<br>(N=413)                     | APN-AKI+<br>(N=188)  | APN+AKI-<br>(N=24)    | APN+AKI+<br>(N=69)     |        |
| Peak CRP (mg/L)                              | 1.0 (0.4-2.5)                           | 1.4 (0.7-3.3)        | 69.2 (29.0-<br>122.6) | 78.4 (33.5-<br>171.2) | <0.001 | 1.1 (0.4-2.1)                           | 1.6 (0.9-3.7)        | 55.1 (28.6-<br>95.6)  | 141.3 (61.0-<br>224.3) | <0.001 |
| Peak sCr (mg/dL)                             | 0.9 (0.7-1.0)                           | 1.3 (1.1-1.6)        | 0.9 (0.7-1.0)         | 1.5 (1.1-1.9)         | <0.001 | 0.9 (0.8-1.1)                           | 1.3 (1.1-1.7)        | 0.9 (0.8-1.1)         | 1.8 (1.3-2.6)          | <0.001 |
| Lowest eGFR<br>(ml/min/1.73m <sup>2</sup> )* | 84.4 (72.9-<br>97.9)                    | 55.1 (44.6-<br>66.4) | 79.1 (68.6-<br>98.4)  | 46.2 (32.1-<br>59.7)  | <0.001 | 81.1 (69.2-<br>97.0)                    | 54.9 (41.0-<br>69.1) | 74.2 (58.0-<br>82.7)  | 36.9 (25.0-<br>50.7)   | <0.001 |
| GFR 30%<br>reduction, n (%)                  | 21 (4.17%)                              | 48 (18.0%)           | 6 (15.8%)             | 25 (24.3%)            | <0.001 | 32 (7.8%)                               | 50 (26.6%)           | 0 (0.0%)              | 23 (33.3%)             | <0.001 |
| GFR 50%<br>reduction, n (%)                  | 0 (0.0%)                                | 10 (3.8%)            | 1 (2.6%)              | 13 (12.6%)            | <0.001 | 8 (1.9%)                                | 18 (9.6%)            | 0 (0.0%)              | 13 (18.8%)             | <0.001 |
| Final sCr (mg/dL)                            | 0.8 (0.7-1.0)                           | 0.9 (0.8-1.2)        | 0.7 (0.6-0.9)         | 0.9 (0.7-1.1)         | <0.001 | 0.8 (0.7-1.0)                           | 1.0 (0.8-1.3)        | 0.8 (0.7-1.1)         | 1.1 (0.8-1.7)          | <0.001 |
| Final eGFR<br>(ml/min/1.73m <sup>2</sup> )*  | 90.5 (75.5-<br>105.8)                   | 80.3 (63.4-<br>97.6) | 92.0 (81.5-<br>109.4) | 76.7 (60.1-<br>95.8)  | <0.001 | 86.0 (73.0-<br>103.2)                   | 75.8 (53.7-<br>97.8) | 78.0 (64.2-<br>100.2) | 61.1 (38.4-<br>85.4)   | <0.001 |

\*eGFR was calculated using the IDMS-MDRD equation (ml/min/1.73 m<sup>2</sup>).

Abbreviations: CRP, C-reactive protein; sCr, serum creatinine; eGFR, estimated glomerular filtration rate; AKI, acute kidney injury



### ***Factors affecting the Renal Outcomes***

We conducted multivariate analysis for the occurrence of a decrease in eGFR >50%. When we adjusted for age, sex, hypertension, DM, APN, AKI, and obstruction duration group (defined by before and after 7 days), we found that concomitant APN (HR 3.495, 95% CI 1.942–6.289;  $p<0.001$ ), concomitant AKI (HR 3.284, 95% CI 1.354–7.965,  $p=0.009$  for AKI stage II; HR 6.425, 95% CI 2.599–15.881,  $p<0.001$  for AKI stage III) and obstruction duration >7 days (HR 1.854, 95% CI 1.095–3.140,  $p=0.001$ ) were independently associated with an eGFR decrease of >50% (table 5).

Table 5. Multivariate analysis for the occurrence of eGFR decrease of >50%

|                                         | HR    | 95% CI       | P      |
|-----------------------------------------|-------|--------------|--------|
| Female                                  | 1.177 | 0.691-2.006  | 0.548  |
| Age                                     | 1.017 | 0.997-1.037  | 0.103  |
| Hypertension                            | 1.743 | 0.994-3.057  | 0.053  |
| Diabetes mellitus                       | 0.939 | 0.533-1.656  | 0.829  |
| Acute pyelonephritis                    | 3.495 | 1.942-6.289  | <0.001 |
| Acute kidney injury                     |       |              |        |
| Stage I                                 | 1.580 | 0.706-3.536  | 0.265  |
| Stage II                                | 3.284 | 1.354-7.965  | 0.009  |
| Stage III                               | 6.425 | 2.599-15.881 | <0.001 |
| Group 2 (obstruction duration > 7 days) | 1.854 | 1.095-3.140  | 0.022  |

Abbreviations: HR, hazard ratio; CI, confidence interval.

### ***Tree Analysis***

Using a decision tree model, AKI stage III was identified at the first decision node as being the most important risk factor. It predicted a rate of GFR decrease >50% of 31.7% ( $p<0.001$ , figure 4A-decision tree). The second most important risk factor was AKI stage II ( $p=0.03$ ).

1  
2  
3 An age >49 years at the time of obstructive uropathy was selected at the next node in the  
4 group of patients with AKI stage I (p=0.019). Concomitant APN during the obstruction  
5 episode was presented for the next node in the group of patients without AKI, and obstruction  
6 duration is <7 days (p=0.002). An obstruction duration >7 days was selected at the next node  
7 in the group of patients without AKI (p=0.035). Input variables were sex, age, APN, AKI  
8 stage, and obstruction duration group; the accuracy of this tree analysis was 96.1%.  
9  
10  
11  
12  
13  
14  
15  
16

17 When we performed a survival tree analysis with variables of sex, age, APN, AKI  
18 stage, and obstruction duration groups, AKI stage III (p<0.001) was the most potent factor for  
19 the development of a GFR decrease >50%, and APN (p<0.001) was the second. An  
20 obstruction duration of more than 7 days (p=0.007) was also an independent risk factor for  
21 major renal outcome in the survival tree analysis (figure 4B).  
22  
23  
24  
25  
26  
27  
28  
29  
30

### 31 **Discussion**

32  
33 In this study, we discovered that obstructive uropathy caused by urolithiasis had the worst  
34 effect on renal outcome in patients with stage II or higher AKI at the time of obstruction. We  
35 also found that patients with APN and obstruction release after 7 days or more were  
36 associated with poor prognosis.  
37  
38  
39  
40  
41

42 In general, renal failure due to unilateral renal stones is known to be rare.<sup>20</sup> In some  
43 previous studies, the incidence of acute renal injury due to renal stones was reported to be in  
44 the range of 0.72–9.7%, and AKI affects to the development or progression of CKD.<sup>21 22</sup>  
45 However, in this study, AKI occurred in 39.1% of unilateral obstructive uropathy patients,  
46 and even if only patients with AKI stage II or III, excluding AKI stage I, were included, AKI  
47 was associated with 10.1%. Unilateral ureteral obstruction is known to result in GFR  
48 reduction due to renal vasoconstriction related with tubuloglomerular feedback, as the  
49 intratubular pressure is increased.<sup>23</sup> Furthermore, recurrent episodes of obstructive uropathy  
50  
51  
52  
53  
54  
55  
56  
57  
58  
59  
60

1  
2  
3 by urolithiasis and obstructive uropathy in single kidneys have a high risk of deteriorating  
4 renal function. In the presence of underlying latent CKD, even unilateral obstructive uropathy  
5 may cause acute renal function decline due to insufficient compensation in the opposite  
6 kidney.<sup>20</sup> Nephrolithiasis itself is known to cause interstitial fibrosis and glomerulosclerosis  
7 due to inflammatory cascade stimulation, as well as the recurrence of episodes and infection  
8 of the occlusion, ultimately increasing the risk of CKD and ESRD.<sup>24 25</sup>  
9  
10  
11  
12  
13  
14  
15  
16

17 In group 2 patients with obstruction release after 7 days, the obstruction duration was  
18 longer when there were no complications. Considering the features and limitations of this  
19 retrospective study, complications such as AKI or APN urgently needed obstacle release.  
20 This is probably because obstruction release was performed more quickly than those without  
21 AKI or APN. Conversely, in the case of asymptomatic urolithiasis, which did not cause any  
22 particular complications, selection bias could be possible since treatment was not performed  
23 in an urgent manner. Nevertheless, when AKI and APN were both adjusted, various statistical  
24 analyses confirmed the association of poor renal outcome with those who had an obstruction  
25 duration of more than 7 days. It seemed to be important to release the obstruction as soon as  
26 possible.  
27  
28  
29  
30  
31  
32  
33  
34  
35  
36  
37  
38  
39

40 In the present study, NSAIDs were the most commonly considered analgesics, as  
41 recommended by the guideline.<sup>26</sup> Only those with both APN and AKI tended to use narcotic  
42 analgesics instead of NSAIDs. This is probably because people with both APN and AKI had  
43 the worst renal function. People with AKI alone were either not aware of AKI as it was very  
44 mild or did not consider it significant enough to have any effect on NSAID usage.  
45  
46  
47  
48  
49  
50

51 When accompanied with sepsis, decompression therapy by percutaneous  
52 nephrostomy was performed frequently in patients with APN, which was consistent with the  
53 guideline recommending urgent decompression, such as percutaneous drainage.<sup>27 28</sup>  
54  
55  
56  
57

58 In this study, the most important prognostic factors of renal outcome were AKI stage  
59  
60

1  
2  
3 II or III, APN and obstruction duration, from both multivariate analyses and the decision tree  
4 analysis. Although renal insult due to the occurrence of obstructive uropathy should have  
5 been apparent, decision tree analysis showed a good prognosis for renal function if there both  
6  
7  
8  
9  
10 AKI and APN are absent and the obstruction was released within 7 days. The result showed  
11  
12 that performing obstruction release as soon as possible, even for those without complications,  
13  
14 is important for improved renal outcome.  
15  
16

17 This study has the limitations of being a retrospective study, and the results cannot  
18  
19 prove a causal relationship. However, considering the difficult characteristics of this study in  
20  
21 performing a randomized controlled trial, it is possible to consider that lowering the incidence  
22  
23 of AKI or APN through early obstruction release may have an additional benefit in improving  
24  
25 prognosis. Especially in patients with recurrent urolithiasis, it would be better to minimize the  
26  
27 insult to the patient's kidney per episode. In addition, the retrospective aspect of this study  
28  
29 may introduce selection bias and mis-classification.  
30  
31  
32

33 In addition, although the date of symptom occurrence and the date of obstruction  
34  
35 release were collected from the electric medical records, there is a possibility that the  
36  
37 symptom date was inaccurate and that it was not an obstruction-specific date. As evidence  
38  
39 was required for the spontaneous resolution of obstruction release dates, the actual date may  
40  
41 be later than the date on which the symptoms were relieved.  
42  
43  
44

45 Obstruction duration is an independent risk factor for poor renal outcome with  
46  
47 concomitant APN and AKI in urolithiasis related obstructive uropathy. Early obstruction  
48  
49 release may contribute to the improvement of prognosis by reducing the incidence of  
50  
51 infection or acute renal failure.  
52  
53  
54

55  
56 **Contributors:** Research idea and study design: JHH; data acquisition: EHL, SK, JS, SBP,  
57  
58 BHC, JHH; data analysis/interpretation: EHL, SBP, BHC, JHH; statistical analysis: SK, JS,  
59  
60

JHH; supervision or mentorship: JHH. Each author contributed important intellectual content during manuscript drafting or revision and accepts accountability for the overall work by ensuring that questions pertaining to the accuracy or integrity of any portion of the work are appropriately investigated and resolved.

### **Funding**

This study was supported by a research grant from the National Research Foundation of Korea funded by the Korean government (NRF-2018R1C1B6007937).

**Competing interests** None declared.

**Patient consent for publication** Not required.

**Ethics approval** This study was approved by the institutional review board (IRB number: 1810-008-16212).

**Provenance and peer review** Not commissioned; externally peer reviewed.

**Data sharing statement** The datasets used and/or analysed during the current study are available from “Mendeley”: <http://dx.doi.org/10.17632/5phfg9dd48.1>

**Open access** This is an open access article distributed in accordance with the Creative Commons Attribution 4.0 Unported (CC BY 4.0) license, which permits others to copy, redistribute, remix, transform and build upon this work for any purpose, provided the original work is properly cited, a link to the licence is given, and indication of whether changes were made. See: <https://creativecommons.org/licenses/by/4.0/>.

## References

1. Morgan MS, Pearle MS. Medical management of renal stones. *BMJ* 2016;352:i52. doi: 10.1136/bmj.i52
2. Romero V, Akpınar H, Assimos DG. Kidney stones: a global picture of prevalence, incidence, and associated risk factors. *Rev Urol* 2010;12(2-3):e86-96.
3. Lopez M, Hoppe B. History, epidemiology and regional diversities of urolithiasis. *Pediatr Nephrol* 2010;25(1):49-59. doi: 10.1007/s00467-008-0960-5
4. Stamatelou KK, Francis ME, Jones CA, et al. Time trends in reported prevalence of kidney stones in the United States: 1976-1994. *Kidney Int* 2003;63(5):1817-23. doi: 10.1046/j.1523-1755.2003.00917.x
5. Indridason OS, Birgisson S, Edvardsson VO, et al. Epidemiology of kidney stones in Iceland: a population-based study. *Scand J Urol Nephrol* 2006;40(3):215-20. doi: 10.1080/00365590600589898
6. Yasui T, Okada A, Hamamoto S, et al. The association between the incidence of urolithiasis and nutrition based on Japanese National Health and Nutrition Surveys. *Urolithiasis* 2013;41(3):217-24. doi: 10.1007/s00240-013-0567-6
7. Jung JS, Han CH, Bae S. Study on the prevalence and incidence of urolithiasis in Korea over the last 10 years: An analysis of National Health Insurance Data. *Investig Clin Urol* 2018;59(6):383-91. doi: 10.4111/icu.2018.59.6.383
8. Ansari MS, Gupta NP. Impact of socioeconomic status in etiology and management of urinary stone disease. *Urol Int* 2003;70(4):255-61. doi: 10.1159/000070130
9. Bartoletti R, Cai T, Mondaini N, et al. Epidemiology and risk factors in urolithiasis. *Urol Int* 2007;79 Suppl 1:3-7. doi: 10.1159/000104434
10. Ferrari P, Piazza R, Ghidini N, et al. Lithiasis and risk factors. *Urol Int* 2007;79 Suppl 1:8-15. doi: 10.1159/000104435
11. Jeong IG, Kang T, Bang JK, et al. Association between metabolic syndrome and the presence of kidney stones in a screened population. *Am J Kidney Dis* 2011;58(3):383-8. doi: 10.1053/j.ajkd.2011.03.021
12. Lotan Y. Economics and cost of care of stone disease. *Adv Chronic Kidney Dis* 2009;16(1):5-10. doi: 10.1053/j.ackd.2008.10.002
13. Trinchieri A. Epidemiological trends in urolithiasis: impact on our health care systems. *Urol Res* 2006;34(2):151-6. doi: 10.1007/s00240-005-0029-x
14. Chawla LS, Kimmel PL. Acute kidney injury and chronic kidney disease: an integrated clinical syndrome. *Kidney Int* 2012;82(5):516-24. doi: 10.1038/ki.2012.208
15. Horne KL, Packington R, Monaghan J, et al. Three-year outcomes after acute kidney injury: results of a prospective parallel group cohort study. *BMJ Open* 2017;7(3):e015316. doi: 10.1136/bmjopen-2016-015316
16. Hamdi A, Hajage D, Van Glabeke E, et al. Severe post-renal acute kidney injury, post-obstructive diuresis and renal recovery. *BJU Int* 2012;110(11 Pt C):E1027-34. doi:

- 1  
2  
3 10.1111/j.1464-410X.2012.11193.x  
4  
5 17. Wood K, Keys T, Mufarrij P, et al. Impact of stone removal on renal function: a review. *Rev*  
6 *Urol* 2011;13(2):73-89.  
7  
8 18. Ashizawa K, Ozawa Y, Okauchi K. Comparative studies of elemental composition on ejaculated  
9 fowl, bull, rat, dog and boar spermatozoa by electron probe X-ray microanalysis. *Comp*  
10 *Biochem Physiol A Comp Physiol* 1987;88(2):269-72.  
11  
12 19. Klahr S, Harris K, Purkerson ML. Effects of obstruction on renal functions. *Pediatr Nephrol*  
13 1988;2(1):34-42.  
14  
15 20. Gosmanova EO, Baumgarten DA, O'Neill WC. Acute kidney injury in a patient with unilateral  
16 ureteral obstruction. *Am J Kidney Dis* 2009;54(4):775-9. doi: 10.1053/j.ajkd.2009.03.028  
17  
18 21. Wang SJ, Mu XN, Zhang LY, et al. The incidence and clinical features of acute kidney injury  
19 secondary to ureteral calculi. *Urol Res* 2012;40(4):345-8. doi: 10.1007/s00240-011-0414-6  
20  
21 22. Hussain M, Hashmi AH, Rizvi SA. Problems and prospects of neglected renal calculi in Pakistan:  
22 can this tragedy be averted? *Urol J* 2013;10(2):848-55.  
23  
24 23. Gaudio KM, Siegel NJ, Hayslett JP, et al. Renal perfusion and intratubular pressure during  
25 ureteral occlusion in the rat. *Am J Physiol* 1980;238(3):F205-9. doi:  
26 10.1152/ajprenal.1980.238.3.F205  
27  
28 24. Keddis MT, Rule AD. Nephrolithiasis and loss of kidney function. *Curr Opin Nephrol Hypertens*  
29 2013;22(4):390-6. doi: 10.1097/MNH.0b013e32836214b9  
30  
31 25. Loeffler I, Wolf G. Transforming growth factor-beta and the progression of renal disease.  
32 *Nephrol Dial Transplant* 2014;29 Suppl 1:i37-i45. doi: 10.1093/ndt/gft267  
33  
34 26. Turk C, Petrik A, Sarica K, et al. EAU Guidelines on Diagnosis and Conservative Management of  
35 Urolithiasis. *Eur Urol* 2016;69(3):468-74. doi: 10.1016/j.eururo.2015.07.040  
36  
37 27. Assimos D, Krambeck A, Miller NL, et al. Surgical Management of Stones: American Urological  
38 Association/Endourological Society Guideline, PART I. *J Urol* 2016;196(4):1153-60. doi:  
39 10.1016/j.juro.2016.05.090  
40  
41 28. Assimos D, Krambeck A, Miller NL, et al. Surgical Management of Stones: American Urological  
42 Association/Endourological Society Guideline, PART II. *J Urol* 2016;196(4):1161-9. doi:  
43 10.1016/j.juro.2016.05.091  
44  
45  
46  
47  
48  
49  
50  
51  
52  
53  
54  
55  
56  
57  
58  
59  
60

## Figure Legends

**Figure 1:** Performed obstruction release procedures by APN, stone size, and obstruction duration

(A) Percutaneous nephrostomy was performed more frequently in patients with APN compared to non-APN patients (10.2% vs. 2.0%).

(B) Stone size was significantly different according to the obstruction release method ( $p < 0.001$ ). Patients who had the obstruction released through percutaneous nephrostomy showed the longest obstruction duration.

**Figure 2:** Kaplan–Meier curves for the renal outcomes

(A, B) When the prognosis was evaluated by the quartile of obstruction duration of all patients, the longer the obstruction duration, the greater the likelihood of a decrease in GFR of more than 30% (log-rank  $p$  for pooled analysis = 0.052, pairwise analysis;  $p = 0.009$  for 1Q vs. 3Q,  $p = 0.037$  for 2Q vs. 3Q, figure 2A) and a decrease in GFR of more than 50% ( $p$  for pooled analysis = 0.016, pairwise analysis;  $p = 0.002$  for 2Q vs. 3Q,  $p = 0.022$  for 2Q vs. 4Q, Figure 2B)

(C, D) When we compare the results of the two groups, there was a significant increase in possibility of GFR reduction  $>30\%$  ( $p = 0.022$ , Figure 2C) and  $>50\%$  ( $p = 0.003$ , Figure 2D) in Group 2.

**Figure 3:** Kaplan–Meier curves for the renal outcomes by the occurrence of APN and/or AKI

(A, B) The patients with APN were significantly more likely to have a GFR reduction  $>30\%$  ( $p < 0.001$ , Figure 3A) and a GFR reduction  $>50\%$  ( $p < 0.001$ , Figure 3B).

(C, D) The patients with severe AKI of grade II or III, the probability of GFR reduction  $>30\%$  ( $p$  for pooled analysis  $< 0.001$ , HR 1.58, 95% CI 1.37-1.82, pairwise analysis;  $p < 0.001$



1  
2  
3 for No AKI vs. AKI stage II or III, and AKI stage I vs. stage II or III, Figure 3C) and >50%  
4  
5 (p for pooled analysis <0.001, HR 2.62, 95% CI 2.05-3.34, pairwise analysis; p<0.001 for No  
6  
7 AKI vs. AKI stage II or III, p=0.035 for AKI stage I vs. II, p<0.001 for AKI stage I vs. III,  
8  
9 p=0.001 for AKI stage II vs. III, Figure 3D) were significantly higher than the others.

10  
11 (E, F) The prognosis was best when neither AKI nor APN was present, and the prognosis was  
12  
13 progressively worse with AKI alone, APN alone, and both AKI and APN, consecutively (p  
14  
15 for pooled analysis <0.001, HR 1.50, 95% CI 1.33-1.71, pairwise analysis: p=0.029 for  
16  
17 AKI(-)APN(-) vs. AKI(+), p=0.027 for AKI(-)APN(-) vs. APN(+), p<0.001 for  
18  
19 AKI(-)APN(-) vs. AKI(+)APN(+), and p<0.001 for AKI(+) vs. AKI(+)APN(+), Figure 3E;  
20  
21 p<0.001 for pooled analysis, HR 2.18, 95% CI 1.75-2.71, pairwise analysis: p=0.024 for  
22  
23 AKI(-)APN(-) vs. AKI(+), p<0.001 for AKI(-)APN(-) vs. AKI(+)APN(+), and p<0.001  
24  
25 AKI(+) vs. AKI(+)APN(+) Figure 3F).

#### 32 33 **Figure 4.** Tree analyses

34  
35 (A) In a decision tree model, AKI was the most important risk factor for the GFR decrease  
36  
37 >50% (p<0.001). The second most important risk factor was AKI stage II (p=0.03). An age  
38  
39 >49 years at the time of obstructive uropathy was selected at the next node in the group of  
40  
41 patients with AKI stage I (p=0.019). Concomitant APN during the obstruction episode was  
42  
43 presented for the next node in the group of patients without AKI and obstruction duration is  
44  
45 <7 days (p=0.002). An obstruction duration >7 days was selected at the next node, in the  
46  
47 group of patients without AKI (p=0.035).

48  
49 (B) In a survival tree analysis with the variables of sex, age, APN, AKI stage, and obstruction  
50  
51 duration groups, AKI stage III (p<0.001) was the most potent factor for the development of  
52  
53 a GFR decrease >50%; APN was the second highest factor (p<0.001). An obstruction  
54  
55  
56  
57  
58  
59  
60

1  
2  
3 duration of more than 7 days ( $p=0.007$ ) was also an independent risk factor for major renal  
4  
5 outcomes in the survival tree analysis.  
6  
7  
8  
9  
10  
11  
12  
13  
14  
15  
16  
17  
18  
19  
20  
21  
22  
23  
24  
25  
26  
27  
28  
29  
30  
31  
32  
33  
34  
35  
36  
37  
38  
39  
40  
41  
42  
43  
44  
45  
46  
47  
48  
49  
50  
51  
52  
53  
54  
55  
56  
57  
58  
59  
60

For peer review only



Figure 1: Performed obstruction release procedures by APN, stone size, and obstruction duration  
 (A) Percutaneous nephrostomy was performed more frequently in patients with APN compared to non-APN patients (10.2% vs. 2.0%).

(B) Stone size was significantly different according to the obstruction release method ( $p < 0.001$ ). Patients who had the obstruction released through percutaneous nephrostomy showed the longest obstruction duration.

199x149mm (300 x 300 DPI)

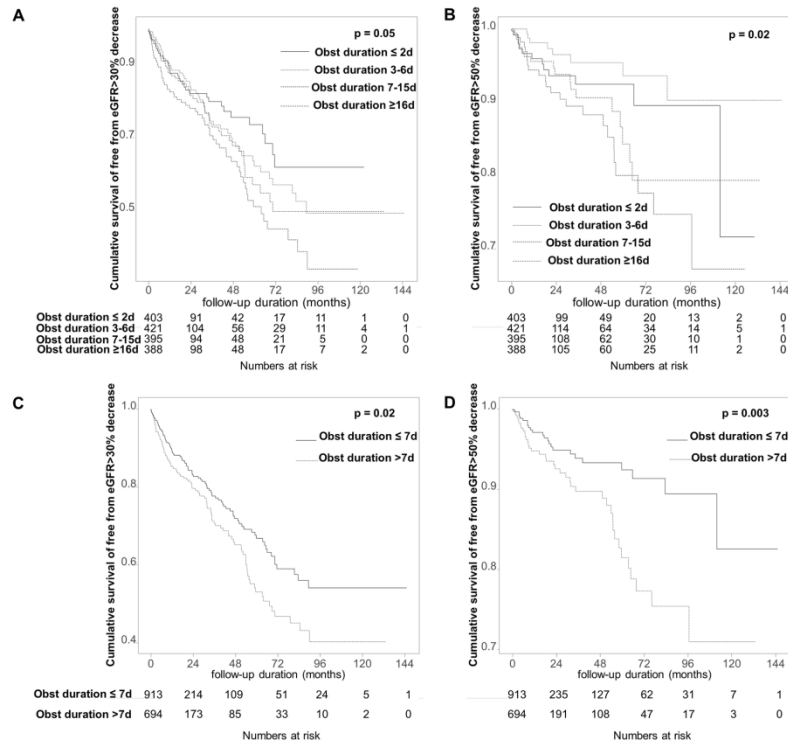

Figure 2: Kaplan–Meier curves for the renal outcomes

(A, B) When the prognosis was evaluated by the quartile of obstruction duration of all patients, the longer the obstruction duration, the greater the likelihood of a decrease in GFR of more than 30% ( $p=0.052$ , Figure 2A) and a decrease in GFR of more than 50% ( $p=0.016$ , Figure 2B)

(C, D) When we compare the results of the two groups, there was a significant increase in possibility of GFR reduction >30% ( $p=0.022$ , Figure 2C) and >50% ( $p=0.003$ , Figure 2D) in Group 2.

199x149mm (300 x 300 DPI)



Figure 3: Kaplan–Meier curves for the renal outcomes by the occurrence of APN and/or AKI (A, B) The patients with APN were significantly more likely to have a GFR reduction >30% (p<0.001, Figure 3A) and a GFR reduction >50% (p<0.001, Figure 3B). (C, D) The patients with severe AKI of grade II or III, the probability of GFR reduction >30% (p<0.001, Figure 3C) and >50% (p<0.001, Figure 3D) were significantly higher than the others. (E, F) The prognosis was best when neither AKI nor APN was present, and the prognosis was progressively worse with AKI alone, APN alone, and both AKI and APN, consecutively (p<0.001, Figure 3E, 3F).

199x266mm (300 x 300 DPI)

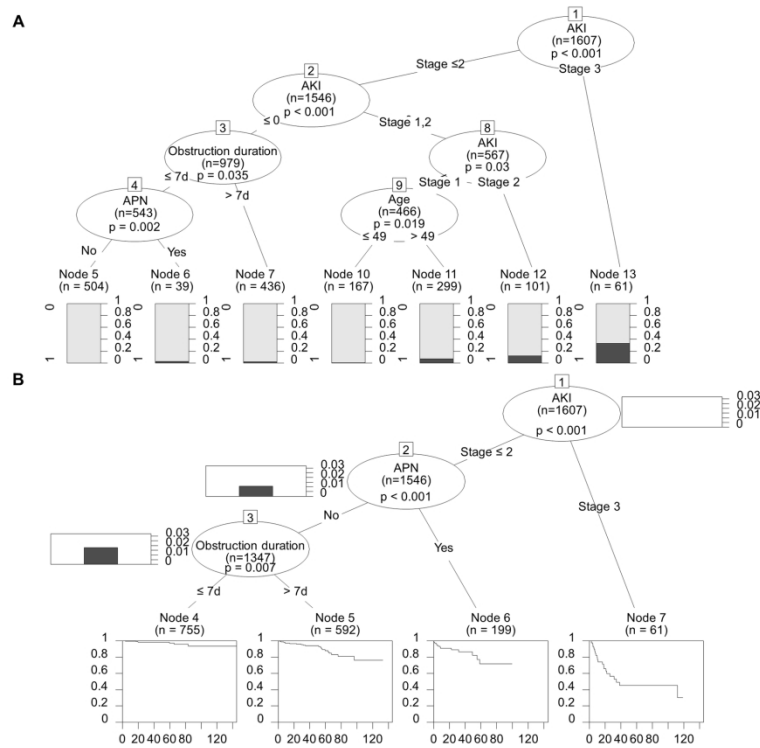

Figure 4. Tree analyses

(A) In a decision tree model, AKI was the most important risk factor for the GFR decrease >50% (p < 0.001).

The second most important risk factor was AKI stage II (p = 0.03). An age >49 years at the time of obstructive uropathy was selected at the next node in the group of patients with AKI stage I (p = 0.019).

Concomitant APN during the obstruction episode was presented for the next node in the group of patients without AKI and obstruction duration is <7 days (p = 0.002). An obstruction duration >7 days was selected at the next node, in the group of patients without AKI (p = 0.035).

(B) In a survival tree analysis with the variables of sex, age, APN, AKI stage, and obstruction duration groups, AKI stage III (p < 0.001) was the most potent factor for the development of a GFR decrease >50%; APN was the second highest factor (p < 0.001). An obstruction duration of more than 7 days (p = 0.007) was also an independent risk factor for major renal outcomes in the survival tree analysis.

199x149mm (300 x 300 DPI)

Table S1. Primary or secondary diagnosis of patients included in the screening list

| International Classification of Diseases-10 Codes | International Classification of Diseases-10 Diagnosis |
|---------------------------------------------------|-------------------------------------------------------|
| N200                                              | Calculus of kidney                                    |
| N200.01                                           | Nephrolithiasis, NOS                                  |
| N200.02                                           | Renal calculus or stone                               |
| N200.03                                           | Staghorn Calculus                                     |
| N200.04                                           | Stone in kidney                                       |
| N201                                              | Calculus of ureter                                    |
| N201.01                                           | Ureteric stone                                        |
| N201.02                                           | UPJ (ureteropelvic junction) stone                    |
| N201.03                                           | UVJ (ureterovesical junction) stone                   |
| N202                                              | Calculus of kidney with calculus of ureter            |
| N209                                              | Urinary calculus, unspecified                         |
| N209.01                                           | Calculous pyelonephritis                              |
| N210                                              | Calculus in bladder                                   |
| N210.02                                           | Urinary bladder stone                                 |
| N211                                              | Calculus in urethra                                   |
| N218                                              | Other lower urinary tract calculus                    |
| N219                                              | Calculus of lower urinary tract, unspecified          |

**STROBE 2007 (v4) Statement—Checklist of items that should be included in reports of *cohort studies***

| Section/Topic                | Item # | Recommendation                                                                                                                                                                       | Reported on page # |
|------------------------------|--------|--------------------------------------------------------------------------------------------------------------------------------------------------------------------------------------|--------------------|
| <b>Title and abstract</b>    | 1      | (a) Indicate the study's design with a commonly used term in the title or the abstract                                                                                               | 2                  |
|                              |        | (b) Provide in the abstract an informative and balanced summary of what was done and what was found                                                                                  | 2-3                |
| <b>Introduction</b>          |        |                                                                                                                                                                                      |                    |
| Background/rationale         | 2      | Explain the scientific background and rationale for the investigation being reported                                                                                                 | 4                  |
| Objectives                   | 3      | State specific objectives, including any prespecified hypotheses                                                                                                                     | 4                  |
| <b>Methods</b>               |        |                                                                                                                                                                                      |                    |
| Study design                 | 4      | Present key elements of study design early in the paper                                                                                                                              | 5                  |
| Setting                      | 5      | Describe the setting, locations, and relevant dates, including periods of recruitment, exposure, follow-up, and data collection                                                      | 5                  |
| Participants                 | 6      | (a) Give the eligibility criteria, and the sources and methods of selection of participants. Describe methods of follow-up                                                           | 5                  |
|                              |        | (b) For matched studies, give matching criteria and number of exposed and unexposed                                                                                                  | N/A                |
| Variables                    | 7      | Clearly define all outcomes, exposures, predictors, potential confounders, and effect modifiers. Give diagnostic criteria, if applicable                                             | 5-6                |
| Data sources/<br>measurement | 8*     | For each variable of interest, give sources of data and details of methods of assessment (measurement). Describe comparability of assessment methods if there is more than one group | 5,7                |
| Bias                         | 9      | Describe any efforts to address potential sources of bias                                                                                                                            | 13                 |
| Study size                   | 10     | Explain how the study size was arrived at                                                                                                                                            | 7                  |
| Quantitative variables       | 11     | Explain how quantitative variables were handled in the analyses. If applicable, describe which groupings were chosen and why                                                         | 7                  |
| Statistical methods          | 12     | (a) Describe all statistical methods, including those used to control for confounding                                                                                                | 7                  |
|                              |        | (b) Describe any methods used to examine subgroups and interactions                                                                                                                  | N/A                |
|                              |        | (c) Explain how missing data were addressed                                                                                                                                          | N/A                |
|                              |        | (d) If applicable, explain how loss to follow-up was addressed                                                                                                                       | N/A                |
|                              |        | (e) Describe any sensitivity analyses                                                                                                                                                | N/A                |
| <b>Results</b>               |        |                                                                                                                                                                                      |                    |



|                          |     |                                                                                                                                                                                                              |       |
|--------------------------|-----|--------------------------------------------------------------------------------------------------------------------------------------------------------------------------------------------------------------|-------|
| Participants             | 13* | (a) Report numbers of individuals at each stage of study—eg numbers potentially eligible, examined for eligibility, confirmed eligible, included in the study, completing follow-up, and analysed            | 7     |
|                          |     | (b) Give reasons for non-participation at each stage                                                                                                                                                         | 7     |
|                          |     | (c) Consider use of a flow diagram                                                                                                                                                                           | N/A   |
| Descriptive data         | 14* | (a) Give characteristics of study participants (eg demographic, clinical, social) and information on exposures and potential confounders                                                                     | 7-8   |
|                          |     | (b) Indicate number of participants with missing data for each variable of interest                                                                                                                          | N/A   |
|                          |     | (c) Summarise follow-up time (eg, average and total amount)                                                                                                                                                  | 8     |
| Outcome data             | 15* | Report numbers of outcome events or summary measures over time                                                                                                                                               | 9-10  |
| Main results             | 16  | (a) Give unadjusted estimates and, if applicable, confounder-adjusted estimates and their precision (eg, 95% confidence interval). Make clear which confounders were adjusted for and why they were included | 10    |
|                          |     | (b) Report category boundaries when continuous variables were categorized                                                                                                                                    | 8     |
|                          |     | (c) If relevant, consider translating estimates of relative risk into absolute risk for a meaningful time period                                                                                             | N/A   |
| Other analyses           | 17  | Report other analyses done—eg analyses of subgroups and interactions, and sensitivity analyses                                                                                                               | 10-11 |
| <b>Discussion</b>        |     |                                                                                                                                                                                                              |       |
| Key results              | 18  | Summarise key results with reference to study objectives                                                                                                                                                     | 11    |
| <b>Limitations</b>       |     |                                                                                                                                                                                                              |       |
| Interpretation           | 20  | Give a cautious overall interpretation of results considering objectives, limitations, multiplicity of analyses, results from similar studies, and other relevant evidence                                   | 13    |
| Generalisability         | 21  | Discuss the generalisability (external validity) of the study results                                                                                                                                        | 12-13 |
| <b>Other information</b> |     |                                                                                                                                                                                                              |       |
| Funding                  | 22  | Give the source of funding and the role of the funders for the present study and, if applicable, for the original study on which the present article is based                                                | 14    |

\*Give information separately for cases and controls in case-control studies and, if applicable, for exposed and unexposed groups in cohort and cross-sectional studies.

**Note:** An Explanation and Elaboration article discusses each checklist item and gives methodological background and published examples of transparent reporting. The STROBE checklist is best used in conjunction with this article (freely available on the Web sites of PLoS Medicine at <http://www.plosmedicine.org/>, Annals of Internal Medicine at <http://www.annals.org/>, and Epidemiology at <http://www.epidem.com/>). Information on the STROBE Initiative is available at [www.strobe-statement.org](http://www.strobe-statement.org).

# BMJ Open

## Effects on Renal Outcome of Concomitant Acute Pyelonephritis, Acute Kidney Injury, and Obstruction Duration in Obstructive Uropathy by Urolithiasis: Retrospective Cohort Study

|                                 |                                                                                                                                                                                                                                                                                                                                                                                                  |
|---------------------------------|--------------------------------------------------------------------------------------------------------------------------------------------------------------------------------------------------------------------------------------------------------------------------------------------------------------------------------------------------------------------------------------------------|
| Journal:                        | <i>BMJ Open</i>                                                                                                                                                                                                                                                                                                                                                                                  |
| Manuscript ID                   | bmjopen-2019-030438.R2                                                                                                                                                                                                                                                                                                                                                                           |
| Article Type:                   | Original research                                                                                                                                                                                                                                                                                                                                                                                |
| Date Submitted by the Author:   | 21-Aug-2019                                                                                                                                                                                                                                                                                                                                                                                      |
| Complete List of Authors:       | Lee, Eung Hyun; Chung-Ang University Hospital, Internal Medicine<br>Kim, Su-Hyun; Chung-Ang University Hospital, Internal Medicine<br>Shin, Jung-ho; Chung-Ang University Hospital, Internal Medicine<br>Park, Sung Bin; Chung-Ang University Hospital, Radiology<br>Chi, Byung Hoon ; Chung-Ang University Hospital, Urology<br>Hwang, Jin Ho; Chung-Ang University Hospital, Internal Medicine |
| <b>Primary Subject Heading</b>: | Renal medicine                                                                                                                                                                                                                                                                                                                                                                                   |
| Secondary Subject Heading:      | Urology                                                                                                                                                                                                                                                                                                                                                                                          |
| Keywords:                       | acute pyelonephritis, Chronic renal failure < NEPHROLOGY, Acute renal failure < NEPHROLOGY, nephrolithiasis, Urolithiasis < UROLOGY, obstructive uropathy                                                                                                                                                                                                                                        |
|                                 |                                                                                                                                                                                                                                                                                                                                                                                                  |

SCHOLARONE™  
Manuscripts

**Title Page**

Effects on Renal Outcome of Concomitant Acute Pyelonephritis, Acute Kidney Injury, and  
Obstruction Duration in Obstructive Uropathy by Urolithiasis: Retrospective Cohort Study

**Authors**

Eung Hyun Lee,<sup>1</sup> Su-Hyun Kim,<sup>1</sup> Jung-ho Shin,<sup>1</sup> Sung Bin Park,<sup>2</sup> Byung Hoon Chi,<sup>3</sup> Jin Ho  
Hwang,<sup>1,\*</sup>

**Affiliations**

<sup>1</sup>Department of Internal Medicine, Chung-Ang University Hospital, Seoul, Korea

<sup>2</sup>Department of Radiology, Chung-Ang University Hospital, Seoul, Korea

<sup>3</sup>Department of Urology, Chung-Ang University Hospital, Seoul, Korea

**Total Number of Tables: 5, Figures: 4**

**Word count: 3798**

**\*Addresses for Correspondence:**

Jin Ho Hwang, MD, PhD

Clinical Assistant Professor

Division of Nephrology, Department of Internal Medicine

Chung-Ang University Hospital

102 Heukseok-ro, Dongjak-gu, Seoul 06973, Republic of Korea

Tel. +82-2-6299-1447, Fax. +82-2-6299-2064

E-mail: dennyjinho@gmail.com

## Abstract

**Objective:** Obstruction release from urolithiasis can be delayed, with a lack of suggested time for preventing the deterioration of renal function. The objective of this study was to investigate the effect of obstruction duration, concomitant AKI or acute pyelonephritis (APN) during the obstruction on the prognosis of renal function.

**Design:** Retrospective cohort study

**Setting & Participants:** 1607 patients from a urolithiasis-related obstructive uropathy cohort, between January 2005 and December 2015.

**Outcome measures:** Estimated GFR (eGFR) decrease  $\geq 30\%$  and/or end-stage renal disease (ESRD), and eGFR decrease  $\geq 50\%$  and/or ESRD according to obstruction duration, acute kidney injury (AKI), and acute pyelonephritis (APN) accompanied by obstructive uropathy.

**Results:** When the prognosis was divided by the obstruction duration quartile, the longer the obstruction duration, the higher the probability of eGFR reduction  $>50\%$  ( $p=0.02$ ). In patients with concomitant APN or severe AKI during hospitalization with obstructive uropathy, an eGFR decrease of  $>30\%$  and  $>50\%$  occurred more frequently, compared to the others ( $p<0.001$ ). When we adjusted for sex, age, HT, DM, APN, AKI grades, and obstruction release  $>7$  days for multivariate analysis, we found that concomitant APN (HR 3.495, 95% CI 1.942–6.289;  $p<0.001$ ), concomitant AKI (HR 3.284, 95% CI 1.354–7.965,  $p=0.009$  for AKI stage II; HR 6.425, 95% CI 2.599–15.881,  $p<0.001$  for AKI stage III) and an obstruction duration  $>7$  days (HR 1.854, 95% CI 1.095–3.140,  $p=0.001$ ) were independently associated with an eGFR decrease  $>50\%$ . Tree analysis also showed that AKI grade 3, APN, and an obstruction duration  $>7$  days were the most important factors affecting the renal outcome.

**Conclusions:** In urolithiasis-related obstructive uropathy patients, concomitant APN was strongly associated with the deterioration of renal function after obstruction release. The elapsed time to release the obstruction also affected renal function.

1  
2  
3  
4  
5 **Keywords:** acute kidney injury; acute pyelonephritis; chronic kidney disease; kidney stone;  
6 nephrolithiasis; obstructive uropathy; prognosis; renal outcome; urinary tract obstruction;  
7  
8  
9 urolithiasis  
10  
11  
12  
13  
14  
15  
16  
17  
18  
19  
20  
21  
22  
23  
24  
25  
26  
27  
28  
29  
30  
31  
32  
33  
34  
35  
36  
37  
38  
39  
40  
41  
42  
43  
44  
45  
46  
47  
48  
49  
50  
51  
52  
53  
54  
55  
56  
57  
58  
59  
60

For peer review only

### Strengths and limitations of this study

- Considering the difficult characteristics of this study in performing a randomized controlled trial, it is possible to consider that lowering the incidence of AKI or APN through early obstruction release may have an additional benefit in improving prognosis, especially in patients with recurrent urolithiasis.
- There is a possibility that the symptom occurrence date was not an obstruction-specific date, and as evidence was required for the spontaneous resolution of obstruction release dates, the actual date may be later than the date on which the symptoms were relieved.
- The results cannot prove a causal relationship and the retrospective aspect of this study may introduce selection bias and mis-classification.

## Introduction

Urolithiasis-related obstructive uropathy is increasingly becoming one of the leading causes of chronic kidney disease (CKD), which is commonly encountered in the clinical field.<sup>1 2</sup> It occurs worldwide, but the incidence and prevalence can vary widely from country to country.<sup>2-7</sup> The differences are generally known to be affected by sex, age, regional characteristics (diet habit and environment), race, amount of water intake, obesity and other comorbidities.<sup>8-10</sup>

Urolithiasis is a cause of various discomforting symptoms, such as severe pain, hematuria, or lower urinary tract symptoms that worsen quality of life. In addition, it is associated with socioeconomic losses in various aspects as it often requires invasive treatment, such as intervention or surgery to remove stones, leading to the hospitalization of an economically active age population. Patients with urolithiasis commonly experience recurrent episodes of ureteral obstruction, or concomitant metabolic disorders such as hyperuricemia, diabetes mellitus or dyslipidemia.<sup>11</sup> Also, if obstructive uropathy by urolithiasis causes additional complications such as acute kidney injury (AKI) or infection, postobstructive diuresis, socioeconomic burden is further increased due to a longer hospital stay and CKD progression.<sup>12-16</sup> The incidence of acute renal injury due to renal stones has been reported to be 0.72–9.7%. Stone removal improves occlusion and restores renal function.<sup>17</sup> Therefore, early obstruction release is thought to have an important effect on prognosis, by preventing infections and renal dysfunction. However, obstruction release from urolithiasis can be easily delayed for various reasons in clinical practice, with a lack of suggested golden time for preventing the deterioration of renal function.

The purpose of this study was to investigate the effect of obstruction duration itself, due to urolithiasis, and the effect of concomitant AKI or acute pyelonephritis (APN) during the obstruction on the prognosis of renal function.

## Materials and Methods

### *Study Design and Patients*

A total of 2314 patients were screened and admitted to Chung-Ang University Hospital with urolithiasis (table S1) from January 2005 to December 2015. Of these patients, 1607 were eligible for analysis, excluding 707: no evidence of obstructive uropathy (259), obstruction onset date unknown (187), obstruction release date unknown (the symptom relieve date is not specified in spontaneous release, or there is no image evidence) (175), staghorn stone (55), pediatric patients (12), obstructive uropathy due to other causes besides a renal stone (11), and follow up loss after discharge (8). All the included patients were at least of 15 years of age, were admitted to the hospital because of obstructive uropathy due to urolithiasis, and were able to estimate the date of occurrence of the obstruction as the symptom date was recorded. Basic clinical parameters were collected, such as age at the time of admission, sex, underlying comorbidities (hypertension [HT], diabetes mellitus [DM], and alleged CKD), information about the laboratory findings (at the time of admission, peak c-reactive protein [CRP], the highest serum creatinine and the lowest estimated glomerular filtration rate [eGFR]), information about the urolithiasis (performed radiologic modality for diagnosis, obstruction site, obstruction side, selected procedure to release obstructive uropathy, stone size, and grade of hydronephrosis), the use of pain killers, and the outcome profiles (follow-up eGFR). This study was approved by Chung-Ang University Hospital Institutional Review Board (IRB number: 1810-008-16212) and the need for informed consent was waived as this study used a retrospective design. All clinical investigations were conducted in accordance with the guidelines of the 2013 Declaration of Helsinki.

### **Measurement and definition of parameters**

Obstruction duration was calculated as the difference between the documented symptom



1  
2  
3 onset date and the date on which the obstruction was directly resolved by procedure, or from  
4  
5 the date on which the pain was markedly improved, in the spontaneous release patients.  
6  
7

8 Concomitant APN was defined as the presence of APN diagnosis in the medical  
9  
10 records or the use of antibiotics for urinary tract infection treatment for more than 7 days, in  
11  
12 patients with CRP >10 mg/L.  
13  
14

15 All serum creatinine and eGFR data were collected before, during, and after  
16  
17 admission, to confirm baseline renal function and AKI during hospitalization. AKI was  
18  
19 defined by serum creatinine change, as described in the Kidney Disease: Improving Global  
20  
21 Outcomes (KDIGO) clinical practice guideline:<sup>18</sup> AKI was diagnosed when there was an  
22  
23 abrupt reduction in kidney function, with an absolute increase in serum creatinine (SCr) level  
24  
25 by  $\geq 0.3$  mg/dL within 48 hours, and/or an increase of more than 1.5-fold from the baseline  
26  
27 SCr level within 7 days. Then, AKI stages were further evaluated as follows: AKI stage I, an  
28  
29 increase in SCr 1.5–1.9 times from baseline, or by  $\geq 0.3$  mg/dL; AKI stage II, an increase in  
30  
31 SCr of 2.0–2.9 times from baseline; AKI stage III, an increase in SCr more than 3.0 times  
32  
33 from baseline,  $\geq 4.0$  mg/dL, or the initiation of renal replacement therapy. Urine output  
34  
35 criteria were not considered due to the inaccuracy of the data, which should be collected  
36  
37 retrospectively.  
38  
39  
40  
41

42 The size of the renal stone causing the occlusion was measured, with the longest  
43  
44 diameter as the most accurate image modality of each patient. Hydronephrosis was divided  
45  
46 into the four grades of I-IV, with reference to existing literature.<sup>19</sup> Grade I, dilation of the  
47  
48 renal pelvis without dilatation of the calices; Grade II, dilation of the renal pelvis and calices,  
49  
50 that become convex, and no signs of cortical thinning; Grade III, the presence of cortical  
51  
52 thinning; Grade IV, massive dilation of the renal pelvis and calices, with severe cortical  
53  
54 thinning.  
55  
56  
57  
58  
59  
60

### ***Primary and Secondary Objectives***

The primary objective of this study was to evaluate whether the duration of urinary tract obstruction affects the renal outcome. The secondary objective was to evaluate whether the AKI, APN or both events affect the renal outcome. Renal outcomes were evaluated with an eGFR decrease  $\geq 30\%$  and/or end-stage renal disease (ESRD), and an eGFR decrease  $\geq 50\%$  and/or ESRD. Each renal outcome was collected from an event that occurred 3 months after discharge from obstructive uropathy.

### ***Statistical Analysis***

The analyses and calculations in this study were performed using SPSS Statistics V20.0 (IBM Corporation, Armonk, NY, USA), and R version 3.4.4 (R Foundation for Statistical Computing, Vienna, Austria). Continuous variables did not satisfy normality tests, so nonparametric tests (Mann-Whitney  $U$ ) were performed and median (min-max) was provided. For categorical variables, data were expressed as number (percentage) and compared using the Chi-squared test. Renal outcome-free survival rates were also performed, using the Kaplan-Meier method, and comparison between groups was performed using the log-rank test. Building tree-based regression and classification models (decision and survival tree analysis) were performed by recursive partitioning using party package. Input variables were age, sex, APN, AKI stages, and obstruction duration-based groups.

The Cox proportional hazard model was used to identify independent risk factors for the renal outcome, and to calculate the HR and 95% CI. Statistical significance was set at the level of  $p < 0.05$ .

### ***Patient and public involvement***

Patients were not involved in the design of this analysis.

## Results

### *Baseline Data by Obstruction Duration*

From January 2005 to December 2015, a total of 2314 patients with urinary tract stone disease were identified, and a total of 1607 patients were confirmed suitable for analysis. The baseline characteristics of 1607 enrolled patients are described in table 1.

Table 1. Characteristics according to obstruction duration

|                                                 | Obstruction duration<br>≤ 7 days<br>(Group 1, n=913) | Obstruction duration<br>> 7 days<br>(Group 2, n=694) | Total<br>(N=1607)    |
|-------------------------------------------------|------------------------------------------------------|------------------------------------------------------|----------------------|
| Male Gender, n (%)                              | 538 (58.9%)                                          | 435 (62.7%)                                          | 973 (60.5%)          |
| Age (years old)                                 | 52 (39-62)                                           | 56 (45-67)                                           | 54 (41-64)           |
| Hypertension, n (%)                             | 220 (24.1%)                                          | 273 (39.3%)                                          | 493 (30.7%)          |
| Diabetes mellitus, n (%)                        | 114 (12.5%)                                          | 156 (22.5)                                           | 270 (16.8%)          |
| Chronic kidney disease, n (%)                   | 14 (1.5%)                                            | 16 (2.3%)                                            | 30 (1.9%)            |
| Obstruction release procedure, n (%)            |                                                      |                                                      |                      |
| Spontaneous release                             | 71 (7.7%)                                            | 17 (2.5%)                                            | 88 (5.4%)            |
| Double-J stenting                               | 269 (29.5%)                                          | 236 (34.0%)                                          | 505 (31.4%)          |
| Percutaneous nephrostomy                        | 31 (3.4%)                                            | 21 (3.0%)                                            | 52 (3.2%)            |
| Operation (stone removal)                       | 206 (22.6%)                                          | 288 (41.5%)                                          | 494 (30.7%)          |
| ESWL                                            | 336 (36.8%)                                          | 132 (19.0%)                                          | 468 (29.1%)          |
| Obstruction duration (days)                     | 3.0 (3.0-5.0)                                        | 18.0 (11.0-31.3)                                     | 6.0 (2.0-15.0)       |
| Baseline sCr (mg/dL)                            | 0.80 (0.42-0.96)                                     | 0.80 (0.66-1.00)                                     | 0.80 (0.65-0.98)     |
| Baseline eGFR<br>(ml/min/1.73m <sup>2</sup> )*  | 94.89 (78.66-113.66)                                 | 91.67 (74.68-112.77)                                 | 93.62 (77.00-113.43) |
| sCr at admission (mg/dL)                        | 1.00 (0.80-1.25)                                     | 1.00 (0.80-1.20)                                     | 1.00 (0.80-1.21)     |
| eGFR at admission (ml/min/1.73m <sup>2</sup> )* | 74.14 (58.15-91.37)                                  | 74.76 (57.19-90.92)                                  | 74.54 (57.81-91.25)  |

## Performed imaging modality for diagnosis, n (%)

|                     |             |             |             |
|---------------------|-------------|-------------|-------------|
| KUB                 | 43 (4.7%)   | 75 (10.8%)  | 118 (7.3%)  |
| Kidney sonography   | 11 (1.2%)   | 6 (0.9%)    | 17 (1.1%)   |
| Computed tomography | 696 (76.2%) | 493 (71.0%) | 1189 (74%)  |
| IVP                 | 163 (17.9%) | 120 (17.3%) | 283 (17.6%) |

## Hydronephrosis grade, n (%)

|                             |             |             |             |
|-----------------------------|-------------|-------------|-------------|
| Grade 0 (No hydronephrosis) | 179 (20.9%) | 141 (23.0%) | 320 (21.8%) |
| Grade 1                     | 202 (23.6%) | 115 (18.8%) | 317 (21.6%) |
| Grade 2                     | 365 (42.6%) | 172 (28.1%) | 537 (36.6%) |
| Grade 3                     | 94 (11.0%)  | 117 (19.1%) | 211 (14.4%) |
| Grade 4                     | 17 (2.0%)   | 67 (11.0%)  | 94 (5.8%)   |

## Obstruction side

|           |             |             |             |
|-----------|-------------|-------------|-------------|
| Left      | 456 (50.2%) | 328 (47.7%) | 784 (49.1%) |
| Right     | 393 (43.3%) | 300 (43.6%) | 693 (43.4%) |
| Bilateral | 35 (3.8%)   | 26 (3.8%)   | 61 (3.8%)   |
| Undefined | 24 (2.6%)   | 34 (4.9%)   | 58 (3.7%)   |

## Stone size (mm)

|               |                |               |
|---------------|----------------|---------------|
| 5.6 (4.3-7.7) | 7.7 (5.6-10.9) | 6.5 (4.8-9.0) |
|---------------|----------------|---------------|

## Pain killer, n (%)

|                           |             |             |             |
|---------------------------|-------------|-------------|-------------|
| No use                    | 169 (18.5%) | 159 (22.9%) | 328 (20.4%) |
| NSAIDs (Old) <sup>†</sup> | 293 (32.1%) | 195 (28.1%) | 488 (30.4%) |
| NSAIDs (New) <sup>‡</sup> | 389 (42.6%) | 303 (43.7%) | 692 (43.1%) |
| Narcotic analgesics       | 62 (6.8%)   | 37 (5.3%)   | 99 (6.2%)   |

\*eGFR was calculated using the IDMS-MDRD equation (ml/min/1.73 m<sup>2</sup>).

<sup>†</sup>old NSAIDs: naproxen, aceclofenac, ketorolac

<sup>‡</sup>new NSAIDs: talniflumate

Abbreviations: ESWL, Electrocorticoreal Shock Wave Lithotripsy; sCr, serum creatinine; eGFR, estimated glomerular filtration rate; KUB, kidney ureter bladder x-ray; IVP, intravenous pyelogram; NSAIDs: Non-steroidal anti-inflammatory drugs

1  
2  
3 Obstruction duration was at least 0 days (obstruction release at the day of symptom  
4 onset), with the maximum being 1099 days, the median obstruction duration was 6 days  
5 (interquartile range 2–15 days), and the mean obstruction duration was 16.6 days. APN due  
6 to obstruction was observed in 14.6% of patients and the mean CRP value of the patients with  
7 APN was 54.8 mg/L. Patients with HT, DM, and CKD had significantly higher rates of APN  
8 (19.3% in HT, 23% in DM, and 43.3% in CKD), accompanied by obstructive uropathy. AKI  
9 was observed in 629 patients (39.1%): 467 (74.2%) were stage I, 101 (16.1%) were stage II,  
10 and 61 (9.7%) were stage III. Non-steroidal anti-inflammatory drugs (NSAIDs) were  
11 prescribed for pain control in 73.5% of patients. The mean follow-up duration of patients was  
12 18.4 months.

13  
14  
15  
16  
17  
18  
19  
20  
21  
22  
23  
24  
25  
26  
27  
28  
29  
30  
31  
32  
33  
34  
35  
36  
37  
38  
39  
40  
41  
42  
43  
44  
45  
46  
47  
48  
49  
50  
51  
52  
53  
54  
55  
56  
57  
58  
59  
60

When comparing obstruction release time within 7 days (group 1) and obstruction release time over 7 days (group 2), the group 2 patients were older and the prevalence of HTN and type 2 DM were significantly higher. No significant differences were found in serum Cr and eGFR values between the two groups at the time of admission of obstructive uropathy due to urolithiasis.

In group 1, 7.4% of patients were spontaneously released, whereas only 1.9% were spontaneously released in the group 2 patients. Percutaneous nephrostomy was performed more frequently in APN than in non-APN patients (10.2% vs. 2.0%, figure 1).

The stone size was significantly different according to the obstruction release method, as it was  $4.7 \pm 2.8$  mm in the spontaneous release group and  $11.6 \pm 7.9$  mm in the percutaneous nephrostomy group (figure 1B). Group 1 patients were more likely to take computed tomography with diagnostic modality and hydronephrosis less than grade II.

### ***Baseline Data of Subcategorization by APN and/or AKI***

The baseline characteristics of the 1607 patients subcategorized by APN and/or AKI are

1  
2  
3 described in table 2. In group 1 patients, obstruction duration tended to be longer in patients  
4  
5 with complications. However, in group 2, obstruction duration was longer in patients without  
6  
7 complications. In both groups 1 and 2, the prevalence of underlying diseases such as HT, DM  
8  
9 and baseline CKD was higher in patients with AKI. NSAID was the most commonly used  
10  
11 analgesic in these patients. However, only those with both APN and AKI had more narcotic  
12  
13 analgesics prescriptions. Patients with AKI showed a lower initial eGFR compared to patients  
14  
15 without AKI at the time of admission. People who had the obstruction released within 7 days  
16  
17 and people with complications (APN or AKI) tended to have a larger stone size, but those  
18  
19 with the obstruction released after more than 7 days did not show any correlation.  
20  
21  
22  
23  
24  
25  
26  
27  
28  
29  
30  
31  
32  
33  
34  
35  
36  
37  
38  
39  
40  
41  
42  
43  
44  
45  
46  
47  
48  
49  
50  
51  
52  
53  
54  
55  
56  
57  
58  
59  
60

Table 2. Characteristics according to obstruction duration &amp; AKI/APN

|                                      | Obstruction duration $\leq$ 7 days (Group 1) |                     |                    |                     | Obstruction duration $>$ 7 days (Group 2) |                     |                    |                    |
|--------------------------------------|----------------------------------------------|---------------------|--------------------|---------------------|-------------------------------------------|---------------------|--------------------|--------------------|
|                                      | APN-AKI-<br>(N=504)                          | APN-AKI+<br>(N=267) | APN+AKI-<br>(N=38) | APN+AKI+<br>(N=103) | APN-AKI-<br>(N=413)                       | APN-AKI+<br>(N=188) | APN+AKI-<br>(N=24) | APN+AKI+<br>(N=69) |
| Male Gender                          | 287 (56.9%)                                  | 182 (68.2%)         | 13 (34.2%)         | 55 (53.4%)          | 251 (60.8%)                               | 135 (71.8%)         | 10 (41.7%)         | 39 (56.5%)         |
| Age                                  | 48.0 (37.0-58.0)                             | 55.0 (42.0-65.0)    | 52.5 (39.0-69.0)   | 60.0 (50.0-69.5)    | 54.0 (43.0-63.0)                          | 59.0 (48.0-67.0)    | 55.5 (40.5-67.5)   | 67.0 (56.0-76.0)   |
| Obstruction release procedure, n (%) |                                              |                     |                    |                     |                                           |                     |                    |                    |
| Spontaneous release                  | 46 (9.1%)                                    | 16 (6.0%)           | 4 (10.5%)          | 5 (4.9%)            | 10 (2.3%)                                 | 4 (2.2%)            | 0 (0.0%)           | 3 (4.4%)           |
| Double-J stenting                    | 142 (28.2%)                                  | 78 (29.2%)          | 11 (29.0%)         | 38 (36.9%)          | 139 (33.7%)                               | 63 (33.5%)          | 11 (45.8%)         | 23 (33.3%)         |
| PCN                                  | 8 (1.6%)                                     | 6 (2.3%)            | 0 (0.0%)           | 17 (16.5%)          | 7 (1.7%)                                  | 8 (4.3%)            | 1 (4.2%)           | 5 (7.3%)           |
| Operation (stone removal)            | 106 (21.0%)                                  | 66 (24.7%)          | 14 (36.8%)         | 20 (19.4%)          | 182 (44.1%)                               | 78 (41.5%)          | 6 (25.0%)          | 22 (31.9%)         |
| ESWL                                 | 202 (40.1%)                                  | 101 (37.8%)         | 9 (23.7%)          | 23 (22.3%)          | 75 (18.2%)                                | 35 (18.6%)          | 6 (25.0%)          | 16 (23.2%)         |
| Obstruction duration                 | 3.0 (1.0-5.0)                                | 3.0 (1.5-4.0)       | 4.0 (2.0-6.0)      | 4.0 (2.0-5.0)       | 21.0 (12.0-33.0)                          | 15.0 (10.0-30.0)    | 16.0 (10.0-27.0)   | 15.0 (10.0-27.0)   |
| Hypertension                         | 87 (17.3%)                                   | 85 (31.8%)          | 10 (26.3%)         | 38 (36.9%)          | 137 (33.2%)                               | 88 (46.8%)          | 7 (29.2%)          | 41 (59.4%)         |
| Diabetes mellitus                    | 37 (7.3%)                                    | 47 (17.6%)          | 4 (10.5%)          | 26 (25.2%)          | 67 (16.2%)                                | 57 (30.3%)          | 4 (16.7%)          | 28 (40.6%)         |
| Chronic kidney disease               | 0 (0.0%)                                     | 7 (2.6%)            | 0 (0.0%)           | 7 (6.8%)            | 2 (0.5%)                                  | 7 (3.7%)            | 1 (4.2%)           | 6 (8.7%)           |
| Pain killer                          |                                              |                     |                    |                     |                                           |                     |                    |                    |
| No use                               | 59 (11.7%)                                   | 60 (22.5%)          | 9 (23.7%)          | 41 (39.8%)          | 58 (14.0%)                                | 58 (30.9%)          | 7 (29.2%)          | 36 (52.2%)         |
| NSAIDs (Old) <sup>†</sup>            | 20 (4.0%)                                    | 19 (7.1%)           | 5 (13.2%)          | 18 (17.5%)          | 17 (4.1%)                                 | 10 (5.3%)           | 1 (4.2%)           | 9 (13.0%)          |
| NSAIDs (New) <sup>‡</sup>            | 251 (49.8%)                                  | 100 (37.5%)         | 17 (44.7%)         | 21 (20.4%)          | 214 (51.8%)                               | 70 (37.2%)          | 9 (37.5%)          | 10 (14.5%)         |
| Narcotic analgesics                  | 174 (34.5%)                                  | 88 (33.0%)          | 7 (18.4%)          | 23 (22.3%)          | 124 (30.0%)                               | 50 (26.6%)          | 7 (29.2%)          | 14 (20.3%)         |
| Baseline sCr (mg/dL)                 | 0.8 (0.7-0.9)                                | 0.8 (0.7-1.0)       | 0.7 (0.5-0.8)      | 0.8 (0.6-1.0)       | 0.8 (0.7-1.0)                             | 0.8 (0.7-1.0)       | 0.8 (0.6-1.0)      | 0.9 (0.6-1.2)      |

|                                                    |                   |                   |                    |                   |                   |                   |                   |                   |
|----------------------------------------------------|-------------------|-------------------|--------------------|-------------------|-------------------|-------------------|-------------------|-------------------|
| Baseline eGFR<br>(ml/min/1.73m <sup>2</sup> )*     | 96.6 (81.0-112.9) | 91.4 (74.5-113.8) | 105.2 (89.7-126.4) | 93.7 (73.4-111.3) | 94.0 (79.1-113.7) | 91.3 (68.7-114.9) | 92.4 (69.1-109.2) | 79.1 (59.6-103.4) |
| sCr at admission<br>(mg/dL)                        | 0.9 (0.7-1.0)     | 1.2 (1.0-1.5)     | 0.8 (0.7-1.0)      | 1.4 (1.1-1.7)     | 0.9 (0.7-1.0)     | 1.2 (1.0-1.6)     | 0.9 (0.7-1.1)     | 1.6 (1.1-2.0)     |
| eGFR at admission<br>(ml/min/1.73m <sup>2</sup> )* | 85.6 (73.7-99.7)  | 58.0 (46.7-69.1)  | 80.6 (68.6-100.2)  | 48.4 (34.1-63.9)  | 83.5 (71.8-100.7) | 57.6 (43.9-73.5)  | 75.6 (59.5-91.9)  | 40.9 (31.0-61.6)  |
| Performed imaging modality for diagnosis, n (%)    |                   |                   |                    |                   |                   |                   |                   |                   |
| KUB                                                | 3 (6.0%)          | 10 (3.8%)         | 1 (2.6%)           | 2 (1.9%)          | 47 (11.4%)        | 26 (13.8%)        | 0 (0.0%)          | 2 (2.9%)          |
| Kidney<br>sonography                               | 8 (1.6%)          | 3 (1.1%)          | 0 (0.0%)           | 0 (0.0%)          | 4 (1.0%)          | 1 (0.5%)          | 0 (0.0%)          | 1 (1.5%)          |
| CT                                                 | 368 (73.0%)       | 198 (74.2%)       | 35 (92.1%)         | 94 (91.3%)        | 283 (68.5%)       | 128 (68.1%)       | 21 (87.5%)        | 61 (88.4%)        |
| IVP                                                | 98 (19.4%)        | 56 (21.0%)        | 2 (5.3%)           | 7 (6.8%)          | 79 (19.1%)        | 33 (17.6%)        | 3 (12.5%)         | 5 (7.3%)          |
| Hydronephrosis grade                               |                   |                   |                    |                   |                   |                   |                   |                   |
| No<br>hydronephrosis                               | 127 (25.2%)       | 37 (13.9%)        | 4 (10.5%)          | 11 (10.7%)        | 97 (23.5%)        | 28 (14.9%)        | 7 (29.2%)         | 9 (13.0%)         |
| Grade 1                                            | 116 (23.0%)       | 55 (20.6%)        | 12 (31.6%)         | 19 (18.5%)        | 65 (15.7%)        | 34 (18.1%)        | 3 (12.5%)         | 13 (18.8%)        |
| Grade 2                                            | 178 (35.3%)       | 120 (44.9%)       | 18 (47.4%)         | 48 (46.6%)        | 98 (23.7%)        | 48 (25.5%)        | 6 (25.0%)         | 20 (29.0%)        |
| Grade 3                                            | 39 (7.7%)         | 34 (12.7%)        | 3 (7.9%)           | 18 (17.5%)        | 66 (16.0%)        | 30 (16.0%)        | 6 (25.0%)         | 16 (23.2%)        |
| Grade 4                                            | 7 (1.4%)          | 5 (1.9%)          | 1 (2.6%)           | 4 (3.9%)          | 36 (8.7%)         | 22 (11.7%)        | 0 (0.0%)          | 8 (11.6%)         |
| Obstruction side                                   |                   |                   |                    |                   |                   |                   |                   |                   |
| Left                                               | 252 (50.4%)       | 132 (49.6%)       | 21 (55.3%)         | 50 (48.5%)        | 190 (46.3%)       | 92 (49.7%)        | 12 (50.0%)        | 34 (49.3%)        |
| Right                                              | 210 (42.0%)       | 121 (45.5%)       | 13 (34.2%)         | 49 (47.6%)        | 179 (43.7%)       | 76 (41.1%)        | 11 (45.8%)        | 34 (49.3%)        |
| Bilateral                                          | 4 (0.8%)          | 5 (1.9%)          | 2 (5.3%)           | 3 (2.9%)          | 9 (2.2%)          | 4 (2.2%)          | 0 (0.0%)          | 0 (0.0%)          |
| Undefined                                          | 19 (3.8%)         | 5 (1.9%)          | 0 (0.0%)           | 0 (0.0%)          | 23 (5.6%)         | 10 (5.4%)         | 1 (4.2%)          | 0 (0.0%)          |
| Stone size (mm)                                    | 5.3 (4.1-7.34)    | 6.0 (4.6-7.7)     | 6.0 (4.8-6.9)      | 6.1 (4.8-8.9)     | 7.6 (5.6-10.7)    | 8.4 (5.8-12.0)    | 6.3 (4.1-9.4)     | 8.2 (6.2-10.0)    |

\*eGFR was calculated using the IDMS-MDRD equation (ml/min/1.73 m<sup>2</sup>).



1  
2  
3 †old NSAIDs: naproxen, aceclofenac, ketorolac  
4

5 ‡new NSAIDs: talniflumate  
6

7 Abbreviations: PCN, Percutaneous nephrostomy; ESWL, Electrocorporeal Shock Wave Lithotripsy; sCr, serum creatinine; eGFR, estimated glomerular filtration rate;  
8 KUB, kidney ureter bladder x-ray; CT, computed tomography; IVP, intravenous pyelogram; NSAIDs: Non-steroidal anti-inflammatory drugs  
9  
10  
11  
12  
13  
14  
15  
16  
17  
18  
19  
20  
21  
22  
23  
24  
25  
26  
27  
28  
29  
30  
31  
32  
33  
34  
35  
36  
37  
38  
39  
40  
41  
42  
43  
44  
45  
46

For peer review only

### Outcome by Obstruction Duration

In this study, APN occurred more frequently in group 2 patients compared to group 1 (29.3% vs. 10.2%,  $p < 0.001$ ). The last serum creatinine (0.86 vs. 0.90 mg/dL,  $p = 0.004$ ) and eGFR (87 vs. 81 ml/min/1.73 m<sup>2</sup>,  $p = 0.001$ ) also showed worse renal function in group 2 patients (table 3).

Table 3. Outcome variables by obstruction duration

|                                                               | Obstruction<br>duration<br>≤ 7 days<br>(Group 1, n=913) | Obstruction<br>duration<br>> 7 days<br>(Group 2, n=694) | Total<br>(N=1607) | P      |
|---------------------------------------------------------------|---------------------------------------------------------|---------------------------------------------------------|-------------------|--------|
| Acute pyelonephritis, n (%)                                   | 24 (10.2%)                                              | 46 (29.3%)                                              | 235 (14.6%)       | <0.001 |
| Peak CRP (mg/L)                                               | 3.3 (0.8-42.3)                                          | 31.3 (1.7-145.0)                                        | 5.9 (1.0-73.3)    | <0.001 |
| Peak sCr during admission (mg/dL)                             | 1.0 (0.8-1.3)                                           | 1.0 (0.8-1.3)                                           | 1.0 (0.8-1.3)     | 0.454  |
| Lowest eGFR during admission<br>(ml/min/1.73m <sup>2</sup> )* | 72.4 (56.1-89.6)                                        | 71.9 (53.4-88.6)                                        | 72.0 (55.1-89.0)  | 0.307  |
| AKI                                                           |                                                         |                                                         |                   |        |
| no AKI                                                        | 542 (59.4%)                                             | 436 (62.8%)                                             | 978 (60.9%)       | 0.491  |
| KDIGO stage I                                                 | 274 (30.0%)                                             | 192 (27.7%)                                             | 466 (29.0%)       |        |
| KDIGO stage II                                                | 62 (6.8%)                                               | 39 (5.6%)                                               | 101 (6.3%)        |        |
| KDIGO stage III                                               | 34 (3.7%)                                               | 27 (3.9%)                                               | 61 (3.8%)         |        |
| GFR 30% reduction, n (%)                                      | 100 (11.0%)                                             | 105 (15.1%)                                             | 205 (12.8%)       | 0.016  |
| GFR 50% reduction, n (%)                                      | 24 (2.6%)                                               | 39 (5.6%)                                               | 63 (3.9%)         | 0.003  |
| Final sCr (mg/dL)                                             | 0.9 (0.7-1.1)                                           | 0.9 (0.7-1.1)                                           | 0.9 (0.7-1.1)     | 0.004  |
| Final eGFR (ml/min/1.73m <sup>2</sup> )*                      | 87.0 (71.1-102.4)                                       | 81.0 (64.0-100.5)                                       | 84.4 (68.3-101.1) | 0.001  |
| ΔGFR/yr                                                       | 2.5 (0.0-35.8)                                          | 5.7 (0.0-162.8)                                         | 4.0 (0.0-78.5)    | 0.004  |

\*eGFR was calculated using the IDMS-MDRD equation (ml/min/1.73 m<sup>2</sup>).

Abbreviations: CRP, C-reactive protein; sCr, serum creatinine; eGFR, estimated glomerular filtration rate; AKI, acute kidney injury; KDIGO, Kidney Disease: Improving Global Outcomes

1  
2  
3 When the prognosis was evaluated by the quartile of obstruction duration of all  
4 patients, the longer the obstruction duration, the greater the likelihood of a decrease in GFR  
5 more than 30% (log-rank  $p$  for pooled analysis=0.052, pairwise analysis;  $p=0.009$  for 1Q vs.  
6 3Q,  $p=0.037$  for 2Q vs. 3Q, figure 2A), and a decrease in GFR of more than 50% (log-rank  $p$   
7 for pooled analysis=0.016, pairwise analysis;  $p=0.002$  for 2Q vs. 3Q,  $p=0.022$  for 2Q vs. 4Q,  
8 figure 2B) respectively. When we compare the results of the two groups, there was a  
9 significant increase in the possibility of GFR reduction >30% (log-rank  $p=0.022$ , HR 1.38,  
10 95% CI 1.05-1.81, figure 2C) and >50% (log-rank  $p=0.003$ , HR 2.12, 95% CI 1.27-3.53,  
11 figure 2D) in Group 2 (figure 2).

### 22 ***Outcome by APN and/or AKI***

23  
24  
25  
26  
27 Patients who did not have APN or AKI in Group 1 had no events, with a GFR reduction of  
28 more than 50% (table 4).

29  
30  
31  
32  
33 When examining the effect of APN during hospitalization with obstructive uropathy  
34 on renal outcome, patients with APN were significantly more likely to have a GFR reduction  
35 >30% (log-rank  $p<0.001$ , HR 2.61, 95% CI 1.91-3.56, figure 3A) and a GFR reduction >50%  
36 (log-rank  $p<0.001$ , HR 5.81, 95% CI 3.50-9.63, figure 3B).

37  
38  
39  
40  
41  
42 When we examined the renal outcome according to the extent of AKI during  
43 hospitalization, AKI stage I showed a favorable outcome. However, patients with severe AKI  
44 of grade II or III, the probability of GFR reduction >30% (log-rank  $p$  for pooled analysis  
45 <0.001, HR 1.58, 95% CI 1.37-1.82, pairwise analysis;  $p<0.001$  for No AKI vs. AKI stage II  
46 or III, and AKI stage I vs. stage II or III, figure 3C) and >50% (log-rank  $p$  for pooled analysis  
47 <0.001, HR 2.62, 95% CI 2.05-3.34, pairwise analysis;  $p<0.001$  for No AKI vs. AKI stage II  
48 or III,  $p=0.035$  for AKI stage I vs. II,  $p<0.001$  for AKI stage I vs. III,  $p=0.001$  for AKI stage  
49 II vs. III, figure 3D) was significantly higher than the others.

1  
2  
3 The prognosis was best when neither AKI nor APN was present, and the prognosis  
4 was progressively worse with AKI alone, APN alone and both AKI and APN, consecutively  
5 (log-rank  $p$  for pooled analysis  $<0.001$ , HR 1.50, 95% CI 1.33-1.71, pairwise analysis:  
6  $p=0.029$  for AKI(-)APN(-) vs. AKI(+),  $p=0.027$  for AKI(-)APN(-) vs. APN(+),  $p<0.001$  for  
7 AKI(-)APN(-) vs. AKI(+)APN(+), and  $p<0.001$  for AKI(+) vs. AKI(+)APN(+), figure 3E;  
8 log-rank  $p<0.001$  for pooled analysis, HR 2.18, 95% CI 1.75-2.71, pairwise analysis:  $p=0.024$   
9 for AKI(-)APN(-) vs. AKI(+),  $p<0.001$  for AKI(-)APN(-) vs. AKI(+)APN(+), and  $p<0.001$   
10 AKI(+) vs. AKI(+)APN(+), figure 3F).  
11  
12  
13  
14  
15  
16  
17  
18  
19  
20  
21  
22  
23  
24  
25  
26  
27  
28  
29  
30  
31  
32  
33  
34  
35  
36  
37  
38  
39  
40  
41  
42  
43  
44  
45  
46  
47  
48  
49  
50  
51  
52  
53  
54  
55  
56  
57  
58  
59  
60

Table 4. Outcomes according to the obstruction duration &amp; AKI/APN

|                                              | Obstruction duration ≤ 7 days (Group 1) |                      |                       |                       | P      | Obstruction duration > 7 days (Group 2) |                      |                       |                        | P      |
|----------------------------------------------|-----------------------------------------|----------------------|-----------------------|-----------------------|--------|-----------------------------------------|----------------------|-----------------------|------------------------|--------|
|                                              | APN-AKI-<br>(N=504)                     | APN-AKI+<br>(N=267)  | APN+AKI-<br>(N=38)    | APN+AKI+<br>(N=103)   |        | APN-AKI-<br>(N=413)                     | APN-AKI+<br>(N=188)  | APN+AKI-<br>(N=24)    | APN+AKI+<br>(N=69)     |        |
| Peak CRP (mg/L)                              | 1.0 (0.4-2.5)                           | 1.4 (0.7-3.3)        | 69.2 (29.0-<br>122.6) | 78.4 (33.5-<br>171.2) | <0.001 | 1.1 (0.4-2.1)                           | 1.6 (0.9-3.7)        | 55.1 (28.6-<br>95.6)  | 141.3 (61.0-<br>224.3) | <0.001 |
| Peak sCr (mg/dL)                             | 0.9 (0.7-1.0)                           | 1.3 (1.1-1.6)        | 0.9 (0.7-1.0)         | 1.5 (1.1-1.9)         | <0.001 | 0.9 (0.8-1.1)                           | 1.3 (1.1-1.7)        | 0.9 (0.8-1.1)         | 1.8 (1.3-2.6)          | <0.001 |
| Lowest eGFR<br>(ml/min/1.73m <sup>2</sup> )* | 84.4 (72.9-<br>97.9)                    | 55.1 (44.6-<br>66.4) | 79.1 (68.6-<br>98.4)  | 46.2 (32.1-<br>59.7)  | <0.001 | 81.1 (69.2-<br>97.0)                    | 54.9 (41.0-<br>69.1) | 74.2 (58.0-<br>82.7)  | 36.9 (25.0-<br>50.7)   | <0.001 |
| GFR 30%<br>reduction, n (%)                  | 21 (4.17%)                              | 48 (18.0%)           | 6 (15.8%)             | 25 (24.3%)            | <0.001 | 32 (7.8%)                               | 50 (26.6%)           | 0 (0.0%)              | 23 (33.3%)             | <0.001 |
| GFR 50%<br>reduction, n (%)                  | 0 (0.0%)                                | 10 (3.8%)            | 1 (2.6%)              | 13 (12.6%)            | <0.001 | 8 (1.9%)                                | 18 (9.6%)            | 0 (0.0%)              | 13 (18.8%)             | <0.001 |
| Final sCr (mg/dL)                            | 0.8 (0.7-1.0)                           | 0.9 (0.8-1.2)        | 0.7 (0.6-0.9)         | 0.9 (0.7-1.1)         | <0.001 | 0.8 (0.7-1.0)                           | 1.0 (0.8-1.3)        | 0.8 (0.7-1.1)         | 1.1 (0.8-1.7)          | <0.001 |
| Final eGFR<br>(ml/min/1.73m <sup>2</sup> )*  | 90.5 (75.5-<br>105.8)                   | 80.3 (63.4-<br>97.6) | 92.0 (81.5-<br>109.4) | 76.7 (60.1-<br>95.8)  | <0.001 | 86.0 (73.0-<br>103.2)                   | 75.8 (53.7-<br>97.8) | 78.0 (64.2-<br>100.2) | 61.1 (38.4-<br>85.4)   | <0.001 |

\*eGFR was calculated using the IDMS-MDRD equation (ml/min/1.73 m<sup>2</sup>).

Abbreviations: CRP, C-reactive protein; sCr, serum creatinine; eGFR, estimated glomerular filtration rate; AKI, acute kidney injury

### ***Factors affecting the Renal Outcomes***

We conducted multivariate analysis for the occurrence of a decrease in eGFR >50%. When we adjusted for age, sex, hypertension, DM, APN, AKI, and obstruction duration group (defined by before and after 7 days), we found that concomitant APN (HR 3.495, 95% CI 1.942–6.289;  $p<0.001$ ), concomitant AKI (HR 3.284, 95% CI 1.354–7.965,  $p=0.009$  for AKI stage II; HR 6.425, 95% CI 2.599–15.881,  $p<0.001$  for AKI stage III) and obstruction duration >7 days (HR 1.854, 95% CI 1.095–3.140,  $p=0.001$ ) were independently associated with an eGFR decrease of >50% (table 5).

Table 5. Multivariate analysis for the occurrence of eGFR decrease of >50%

|                                         | HR    | 95% CI       | P      |
|-----------------------------------------|-------|--------------|--------|
| Female                                  | 1.177 | 0.691-2.006  | 0.548  |
| Age                                     | 1.017 | 0.997-1.037  | 0.103  |
| Hypertension                            | 1.743 | 0.994-3.057  | 0.053  |
| Diabetes mellitus                       | 0.939 | 0.533-1.656  | 0.829  |
| Acute pyelonephritis                    | 3.495 | 1.942-6.289  | <0.001 |
| Acute kidney injury                     |       |              |        |
| Stage I                                 | 1.580 | 0.706-3.536  | 0.265  |
| Stage II                                | 3.284 | 1.354-7.965  | 0.009  |
| Stage III                               | 6.425 | 2.599-15.881 | <0.001 |
| Group 2 (obstruction duration > 7 days) | 1.854 | 1.095-3.140  | 0.022  |

Abbreviations: HR, hazard ratio; CI, confidence interval.

### ***Tree Analysis***

Using a decision tree model, AKI stage III was identified at the first decision node as being the most important risk factor. It predicted a rate of GFR decrease >50% of 31.7% ( $p<0.001$ , figure 4A-decision tree). The second most important risk factor was AKI stage II ( $p=0.03$ ).

1  
2  
3 An age >49 years at the time of obstructive uropathy was selected at the next node in the  
4 group of patients with AKI stage I (p=0.019). Concomitant APN during the obstruction  
5 episode was presented for the next node in the group of patients without AKI, and obstruction  
6 duration is <7 days (p=0.002). An obstruction duration >7 days was selected at the next node  
7 in the group of patients without AKI (p=0.035). Input variables were sex, age, APN, AKI  
8 stage, and obstruction duration group; the accuracy of this tree analysis was 96.1%.  
9  
10  
11  
12  
13  
14  
15  
16

17 When we performed a survival tree analysis with variables of sex, age, APN, AKI  
18 stage, and obstruction duration groups, AKI stage III (p<0.001) was the most potent factor for  
19 the development of a GFR decrease >50%, and APN (p<0.001) was the second. An  
20 obstruction duration of more than 7 days (p=0.007) was also an independent risk factor for  
21 major renal outcome in the survival tree analysis (figure 4B).  
22  
23  
24  
25  
26  
27  
28  
29  
30

### 31 **Discussion**

32  
33 In this study, we discovered that obstructive uropathy caused by urolithiasis had the worst  
34 effect on renal outcome in patients with stage II or higher AKI at the time of obstruction. We  
35 also found that patients with APN and obstruction release after 7 days or more were  
36 associated with poor prognosis.  
37  
38  
39  
40  
41

42 In general, renal failure due to unilateral renal stones is known to be rare.<sup>20</sup> In some  
43 previous studies, the incidence of acute renal injury due to renal stones was reported to be in  
44 the range of 0.72–9.7%, and AKI affects to the development or progression of CKD.<sup>21 22</sup>  
45 However, in this study, AKI occurred in 39.1% of unilateral obstructive uropathy patients,  
46 and even if only patients with AKI stage II or III, excluding AKI stage I, were included, AKI  
47 was associated with 10.1%. Unilateral ureteral obstruction is known to result in GFR  
48 reduction due to renal vasoconstriction related with tubuloglomerular feedback, as the  
49 intratubular pressure is increased.<sup>23</sup> Furthermore, recurrent episodes of obstructive uropathy  
50  
51  
52  
53  
54  
55  
56  
57  
58  
59  
60

1  
2  
3 by urolithiasis and obstructive uropathy in single kidneys have a high risk of deteriorating  
4 renal function. In the presence of underlying latent CKD, even unilateral obstructive uropathy  
5 may cause acute renal function decline due to insufficient compensation in the opposite  
6 kidney.<sup>20</sup> Nephrolithiasis itself is known to cause interstitial fibrosis and glomerulosclerosis  
7 due to inflammatory cascade stimulation, as well as the recurrence of episodes and infection  
8 of the occlusion, ultimately increasing the risk of CKD and ESRD.<sup>24 25</sup>  
9

10  
11  
12 In group 2 patients with obstruction release after 7 days, the obstruction duration was  
13 longer when there were no complications. Considering the features and limitations of this  
14 retrospective study, complications such as AKI or APN urgently needed obstacle release.  
15 This is probably because obstruction release was performed more quickly than those without  
16 AKI or APN. Conversely, in the case of asymptomatic urolithiasis, which did not cause any  
17 particular complications, selection bias could be possible since treatment was not performed  
18 in an urgent manner. Nevertheless, when AKI and APN were both adjusted, various statistical  
19 analyses confirmed the association of poor renal outcome with those who had an obstruction  
20 duration of more than 7 days. It seemed to be important to release the obstruction as soon as  
21 possible.  
22  
23  
24  
25  
26  
27  
28  
29  
30  
31  
32  
33  
34  
35  
36  
37  
38  
39

40 In the present study, NSAIDs were the most commonly considered analgesics, as  
41 recommended by the guideline.<sup>26</sup> Only those with both APN and AKI tended to use narcotic  
42 analgesics instead of NSAIDs. This is probably because people with both APN and AKI had  
43 the worst renal function. People with AKI alone were either not aware of AKI as it was very  
44 mild or did not consider it significant enough to have any effect on NSAID usage.  
45  
46  
47  
48  
49  
50

51 When accompanied with sepsis, decompression therapy by percutaneous  
52 nephrostomy was performed frequently in patients with APN, which was consistent with the  
53 guideline recommending urgent decompression, such as percutaneous drainage.<sup>27 28</sup>  
54  
55  
56  
57

58 In this study, the most important prognostic factors of renal outcome were AKI stage  
59  
60



1  
2  
3 II or III, APN and obstruction duration, from both multivariate analyses and the decision tree  
4 analysis. Although renal insult due to the occurrence of obstructive uropathy should have  
5 been apparent, decision tree analysis showed a good prognosis for renal function if there both  
6  
7  
8  
9  
10 AKI and APN are absent and the obstruction was released within 7 days. The result showed  
11  
12 that performing obstruction release as soon as possible, even for those without complications,  
13  
14 is important for improved renal outcome.  
15  
16

17 This study has the limitations of being a retrospective study, and the results cannot  
18 prove a causal relationship. However, considering the difficult characteristics of this study in  
19 performing a randomized controlled trial, it is possible to consider that lowering the incidence  
20 of AKI or APN through early obstruction release may have an additional benefit in improving  
21 prognosis. Especially in patients with recurrent urolithiasis, it would be better to minimize the  
22 insult to the patient's kidney per episode. In addition, the retrospective aspect of this study  
23 may introduce selection bias and mis-classification.  
24  
25  
26  
27  
28  
29  
30  
31  
32

33 In addition, although the date of symptom occurrence and the date of obstruction  
34 release were collected from the electric medical records, there is a possibility that the  
35 symptom date was inaccurate and that it was not an obstruction-specific date. As evidence  
36 was required for the spontaneous resolution of obstruction release dates, the actual date may  
37 be later than the date on which the symptoms were relieved.  
38  
39  
40  
41  
42  
43  
44

45 Obstruction duration is an independent risk factor for poor renal outcome with  
46 concomitant APN and AKI in urolithiasis related obstructive uropathy. Early obstruction  
47 release may contribute to the improvement of prognosis by reducing the incidence of  
48 infection or acute renal failure.  
49  
50  
51  
52  
53  
54  
55

56 **Contributors:** Research idea and study design: JHH; data acquisition: EHL, SK, JS, SBP,  
57  
58 BHC, JHH; data analysis/interpretation: EHL, SBP, BHC, JHH; statistical analysis: SK, JS,  
59  
60

1  
2  
3 JHH; supervision or mentorship: JHH. Each author contributed important intellectual content  
4 during manuscript drafting or revision and accepts accountability for the overall work by  
5 ensuring that questions pertaining to the accuracy or integrity of any portion of the work are  
6 appropriately investigated and resolved.  
7  
8  
9  
10  
11

## 12 **Funding**

13  
14 This study was supported by a research grant from the National Research Foundation of  
15 Korea funded by the Korean government (NRF-2018R1C1B6007937).  
16  
17  
18

19 **Competing interests:** None declared.  
20

21 **Patient consent for publication:** Not required.  
22

23  
24 **Ethics approval:** This study was approved by the institutional review board (IRB number:  
25 1810-008-16212).  
26  
27

28 **Provenance and peer review:** Not commissioned; externally peer reviewed.  
29

30  
31 **Data sharing statement:** The datasets used and/or analysed during the current study are  
32 available from “Mendeley”: <http://dx.doi.org/10.17632/5phfg9dd48.1>  
33  
34

35  
36 **Open access** This is an open access article distributed in accordance with the Creative  
37 Commons Attribution 4.0 Unported (CC BY 4.0) license, which permits others to copy,  
38 redistribute, remix, transform and build upon this work for any purpose, provided the original  
39 work is properly cited, a link to the licence is given, and indication of whether changes were  
40 made. See: <https://creativecommons.org/licenses/by/4.0/>.  
41  
42  
43  
44  
45  
46  
47  
48  
49  
50  
51  
52  
53  
54  
55  
56  
57  
58  
59  
60

## References

1. Morgan MS, Pearle MS. Medical management of renal stones. *BMJ* 2016;352:i52. doi: 10.1136/bmj.i52
2. Romero V, Akpınar H, Assimos DG. Kidney stones: a global picture of prevalence, incidence, and associated risk factors. *Rev Urol* 2010;12(2-3):e86-96.
3. Lopez M, Hoppe B. History, epidemiology and regional diversities of urolithiasis. *Pediatr Nephrol* 2010;25(1):49-59. doi: 10.1007/s00467-008-0960-5
4. Stamatelou KK, Francis ME, Jones CA, et al. Time trends in reported prevalence of kidney stones in the United States: 1976-1994. *Kidney Int* 2003;63(5):1817-23. doi: 10.1046/j.1523-1755.2003.00917.x
5. Indridason OS, Birgisson S, Edvardsson VO, et al. Epidemiology of kidney stones in Iceland: a population-based study. *Scand J Urol Nephrol* 2006;40(3):215-20. doi: 10.1080/00365590600589898
6. Yasui T, Okada A, Hamamoto S, et al. The association between the incidence of urolithiasis and nutrition based on Japanese National Health and Nutrition Surveys. *Urolithiasis* 2013;41(3):217-24. doi: 10.1007/s00240-013-0567-6
7. Jung JS, Han CH, Bae S. Study on the prevalence and incidence of urolithiasis in Korea over the last 10 years: An analysis of National Health Insurance Data. *Investig Clin Urol* 2018;59(6):383-91. doi: 10.4111/icu.2018.59.6.383
8. Ansari MS, Gupta NP. Impact of socioeconomic status in etiology and management of urinary stone disease. *Urol Int* 2003;70(4):255-61. doi: 10.1159/000070130
9. Bartoletti R, Cai T, Mondaini N, et al. Epidemiology and risk factors in urolithiasis. *Urol Int* 2007;79 Suppl 1:3-7. doi: 10.1159/000104434
10. Ferrari P, Piazza R, Ghidini N, et al. Lithiasis and risk factors. *Urol Int* 2007;79 Suppl 1:8-15. doi: 10.1159/000104435
11. Jeong IG, Kang T, Bang JK, et al. Association between metabolic syndrome and the presence of kidney stones in a screened population. *Am J Kidney Dis* 2011;58(3):383-8. doi: 10.1053/j.ajkd.2011.03.021
12. Lotan Y. Economics and cost of care of stone disease. *Adv Chronic Kidney Dis* 2009;16(1):5-10. doi: 10.1053/j.ackd.2008.10.002
13. Trinchieri A. Epidemiological trends in urolithiasis: impact on our health care systems. *Urol Res* 2006;34(2):151-6. doi: 10.1007/s00240-005-0029-x
14. Chawla LS, Kimmel PL. Acute kidney injury and chronic kidney disease: an integrated clinical syndrome. *Kidney Int* 2012;82(5):516-24. doi: 10.1038/ki.2012.208
15. Horne KL, Packington R, Monaghan J, et al. Three-year outcomes after acute kidney injury: results of a prospective parallel group cohort study. *BMJ Open* 2017;7(3):e015316. doi: 10.1136/bmjopen-2016-015316
16. Hamdi A, Hajage D, Van Glabeke E, et al. Severe post-renal acute kidney injury, post-obstructive diuresis and renal recovery. *BJU Int* 2012;110(11 Pt C):E1027-34. doi:

- 1  
2  
3 10.1111/j.1464-410X.2012.11193.x  
4  
5 17. Wood K, Keys T, Mufarrij P, et al. Impact of stone removal on renal function: a review. *Rev*  
6 *Urol* 2011;13(2):73-89.  
7  
8 18. Ashizawa K, Ozawa Y, Okauchi K. Comparative studies of elemental composition on ejaculated  
9 fowl, bull, rat, dog and boar spermatozoa by electron probe X-ray microanalysis. *Comp*  
10 *Biochem Physiol A Comp Physiol* 1987;88(2):269-72.  
11  
12 19. Klahr S, Harris K, Purkerson ML. Effects of obstruction on renal functions. *Pediatr Nephrol*  
13 1988;2(1):34-42.  
14  
15 20. Gosmanova EO, Baumgarten DA, O'Neill WC. Acute kidney injury in a patient with unilateral  
16 ureteral obstruction. *Am J Kidney Dis* 2009;54(4):775-9. doi: 10.1053/j.ajkd.2009.03.028  
17  
18 21. Wang SJ, Mu XN, Zhang LY, et al. The incidence and clinical features of acute kidney injury  
19 secondary to ureteral calculi. *Urol Res* 2012;40(4):345-8. doi: 10.1007/s00240-011-0414-6  
20  
21 22. Hussain M, Hashmi AH, Rizvi SA. Problems and prospects of neglected renal calculi in Pakistan:  
22 can this tragedy be averted? *Urol J* 2013;10(2):848-55.  
23  
24 23. Gaudio KM, Siegel NJ, Hayslett JP, et al. Renal perfusion and intratubular pressure during  
25 ureteral occlusion in the rat. *Am J Physiol* 1980;238(3):F205-9. doi:  
26 10.1152/ajprenal.1980.238.3.F205  
27  
28 24. Keddiss MT, Rule AD. Nephrolithiasis and loss of kidney function. *Curr Opin Nephrol Hypertens*  
29 2013;22(4):390-6. doi: 10.1097/MNH.0b013e32836214b9  
30  
31 25. Loeffler I, Wolf G. Transforming growth factor-beta and the progression of renal disease.  
32 *Nephrol Dial Transplant* 2014;29 Suppl 1:i37-i45. doi: 10.1093/ndt/gft267  
33  
34 26. Turk C, Petrik A, Sarica K, et al. EAU Guidelines on Diagnosis and Conservative Management of  
35 Urolithiasis. *Eur Urol* 2016;69(3):468-74. doi: 10.1016/j.eururo.2015.07.040  
36  
37 27. Assimos D, Krambeck A, Miller NL, et al. Surgical Management of Stones: American Urological  
38 Association/Endourological Society Guideline, PART I. *J Urol* 2016;196(4):1153-60. doi:  
39 10.1016/j.juro.2016.05.090  
40  
41 28. Assimos D, Krambeck A, Miller NL, et al. Surgical Management of Stones: American Urological  
42 Association/Endourological Society Guideline, PART II. *J Urol* 2016;196(4):1161-9. doi:  
43 10.1016/j.juro.2016.05.091  
44  
45  
46  
47  
48  
49  
50  
51  
52  
53  
54  
55  
56  
57  
58  
59  
60

## Figure Legends

**Figure 1:** Performed obstruction release procedures by APN, stone size, and obstruction duration

(A) Percutaneous nephrostomy was performed more frequently in patients with APN compared to non-APN patients (10.2% vs. 2.0%).

(B) Stone size was significantly different according to the obstruction release method ( $p < 0.001$ ). Patients who had the obstruction released through percutaneous nephrostomy showed the longest obstruction duration.

**Figure 2:** Kaplan–Meier curves for the renal outcomes

(A, B) When the prognosis was evaluated by the quartile of obstruction duration of all patients, the longer the obstruction duration, the greater the likelihood of a decrease in GFR of more than 30% (log-rank  $p$  for pooled analysis = 0.052, pairwise analysis;  $p = 0.009$  for 1Q vs. 3Q,  $p = 0.037$  for 2Q vs. 3Q, figure 2A) and a decrease in GFR of more than 50% ( $p$  for pooled analysis = 0.016, pairwise analysis;  $p = 0.002$  for 2Q vs. 3Q,  $p = 0.022$  for 2Q vs. 4Q, Figure 2B)

(C, D) When we compare the results of the two groups, there was a significant increase in possibility of GFR reduction  $>30\%$  ( $p = 0.022$ , Figure 2C) and  $>50\%$  ( $p = 0.003$ , Figure 2D) in Group 2.

**Figure 3:** Kaplan–Meier curves for the renal outcomes by the occurrence of APN and/or AKI

(A, B) The patients with APN were significantly more likely to have a GFR reduction  $>30\%$  ( $p < 0.001$ , Figure 3A) and a GFR reduction  $>50\%$  ( $p < 0.001$ , Figure 3B).

(C, D) The patients with severe AKI of grade II or III, the probability of GFR reduction  $>30\%$  ( $p$  for pooled analysis  $< 0.001$ , HR 1.58, 95% CI 1.37-1.82, pairwise analysis;  $p < 0.001$

1  
2  
3 for No AKI vs. AKI stage II or III, and AKI stage I vs. stage II or III, Figure 3C) and >50%  
4  
5 (p for pooled analysis <0.001, HR 2.62, 95% CI 2.05-3.34, pairwise analysis; p<0.001 for No  
6  
7 AKI vs. AKI stage II or III, p=0.035 for AKI stage I vs. II, p<0.001 for AKI stage I vs. III,  
8  
9 p=0.001 for AKI stage II vs. III, Figure 3D) were significantly higher than the others.

10  
11 (E, F) The prognosis was best when neither AKI nor APN was present, and the prognosis was  
12  
13 progressively worse with AKI alone, APN alone, and both AKI and APN, consecutively (p  
14  
15 for pooled analysis <0.001, HR 1.50, 95% CI 1.33-1.71, pairwise analysis: p=0.029 for  
16  
17 AKI(-)APN(-) vs. AKI(+), p=0.027 for AKI(-)APN(-) vs. APN(+), p<0.001 for  
18  
19 AKI(-)APN(-) vs. AKI(+)APN(+), and p<0.001 for AKI(+) vs. AKI(+)APN(+), Figure 3E;  
20  
21 p<0.001 for pooled analysis, HR 2.18, 95% CI 1.75-2.71, pairwise analysis: p=0.024 for  
22  
23 AKI(-)APN(-) vs. AKI(+), p<0.001 for AKI(-)APN(-) vs. AKI(+)APN(+), and p<0.001  
24  
25 AKI(+) vs. AKI(+)APN(+) Figure 3F).

#### 32 33 **Figure 4.** Tree analyses

34  
35 (A) In a decision tree model, AKI was the most important risk factor for the GFR decrease  
36  
37 >50% (p<0.001). The second most important risk factor was AKI stage II (p=0.03). An age  
38  
39 >49 years at the time of obstructive uropathy was selected at the next node in the group of  
40  
41 patients with AKI stage I (p=0.019). Concomitant APN during the obstruction episode was  
42  
43 presented for the next node in the group of patients without AKI and obstruction duration is  
44  
45 <7 days (p=0.002). An obstruction duration >7 days was selected at the next node, in the  
46  
47 group of patients without AKI (p=0.035).

48  
49 (B) In a survival tree analysis with the variables of sex, age, APN, AKI stage, and obstruction  
50  
51 duration groups, AKI stage III (p<0.001) was the most potent factor for the development of  
52  
53 a GFR decrease >50%; APN was the second highest factor (p<0.001). An obstruction  
54  
55  
56  
57  
58  
59  
60

1  
2  
3 duration of more than 7 days ( $p=0.007$ ) was also an independent risk factor for major renal  
4  
5 outcomes in the survival tree analysis.  
6  
7  
8  
9  
10  
11  
12  
13  
14  
15  
16  
17  
18  
19  
20  
21  
22  
23  
24  
25  
26  
27  
28  
29  
30  
31  
32  
33  
34  
35  
36  
37  
38  
39  
40  
41  
42  
43  
44  
45  
46  
47  
48  
49  
50  
51  
52  
53  
54  
55  
56  
57  
58  
59  
60

For peer review only

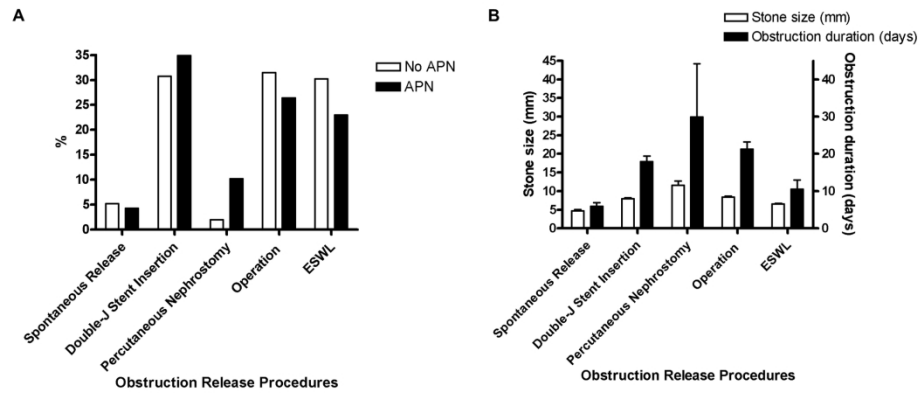

Figure 1: Performed obstruction release procedures by APN, stone size, and obstruction duration  
 (A) Percutaneous nephrostomy was performed more frequently in patients with APN compared to non-APN patients (10.2% vs. 2.0%).  
 (B) Stone size was significantly different according to the obstruction release method ( $p < 0.001$ ). Patients who had the obstruction released through percutaneous nephrostomy showed the longest obstruction duration.

199x149mm (300 x 300 DPI)





Figure 2: Kaplan–Meier curves for the renal outcomes

(A, B) When the prognosis was evaluated by the quartile of obstruction duration of all patients, the longer the obstruction duration, the greater the likelihood of a decrease in GFR of more than 30% ( $p=0.052$ , Figure 2A) and a decrease in GFR of more than 50% ( $p=0.016$ , Figure 2B)

(C, D) When we compare the results of the two groups, there was a significant increase in possibility of GFR reduction >30% ( $p=0.022$ , Figure 2C) and >50% ( $p=0.003$ , Figure 2D) in Group 2.

199x149mm (300 x 300 DPI)



Figure 3: Kaplan–Meier curves for the renal outcomes by the occurrence of APN and/or AKI (A, B) The patients with APN were significantly more likely to have a GFR reduction >30% (p<0.001, Figure 3A) and a GFR reduction >50% (p<0.001, Figure 3B). (C, D) The patients with severe AKI of grade II or III, the probability of GFR reduction >30% (p<0.001, Figure 3C) and >50% (p<0.001, Figure 3D) were significantly higher than the others. (E, F) The prognosis was best when neither AKI nor APN was present, and the prognosis was progressively worse with AKI alone, APN alone, and both AKI and APN, consecutively (p<0.001, Figure 3E, 3F).

199x266mm (300 x 300 DPI)



Figure 4. Tree analyses

(A) In a decision tree model, AKI was the most important risk factor for the GFR decrease >50% (p < 0.001).

The second most important risk factor was AKI stage II (p = 0.03). An age >49 years at the time of obstructive uropathy was selected at the next node in the group of patients with AKI stage I (p = 0.019).

Concomitant APN during the obstruction episode was presented for the next node in the group of patients without AKI and obstruction duration is <7 days (p = 0.002). An obstruction duration >7 days was selected at the next node, in the group of patients without AKI (p = 0.035).

(B) In a survival tree analysis with the variables of sex, age, APN, AKI stage, and obstruction duration groups, AKI stage III (p < 0.001) was the most potent factor for the development of a GFR decrease >50%; APN was the second highest factor (p < 0.001). An obstruction duration of more than 7 days (p = 0.007) was also an independent risk factor for major renal outcomes in the survival tree analysis.

199x149mm (300 x 300 DPI)

Table S1. Primary or secondary diagnosis of patients included in the screening list

| International Classification of Diseases-10 Codes | International Classification of Diseases-10 Diagnosis |
|---------------------------------------------------|-------------------------------------------------------|
| N200                                              | Calculus of kidney                                    |
| N200.01                                           | Nephrolithiasis, NOS                                  |
| N200.02                                           | Renal calculus or stone                               |
| N200.03                                           | Staghorn Calculus                                     |
| N200.04                                           | Stone in kidney                                       |
| N201                                              | Calculus of ureter                                    |
| N201.01                                           | Ureteric stone                                        |
| N201.02                                           | UPJ (ureteropelvic junction) stone                    |
| N201.03                                           | UVJ (ureterovesical junction) stone                   |
| N202                                              | Calculus of kidney with calculus of ureter            |
| N209                                              | Urinary calculus, unspecified                         |
| N209.01                                           | Calculous pyelonephritis                              |
| N210                                              | Calculus in bladder                                   |
| N210.02                                           | Urinary bladder stone                                 |
| N211                                              | Calculus in urethra                                   |
| N218                                              | Other lower urinary tract calculus                    |
| N219                                              | Calculus of lower urinary tract, unspecified          |

**STROBE 2007 (v4) Statement—Checklist of items that should be included in reports of cohort studies**

| Section/Topic                | Item # | Recommendation                                                                                                                                                                       | Reported on page # |
|------------------------------|--------|--------------------------------------------------------------------------------------------------------------------------------------------------------------------------------------|--------------------|
| <b>Title and abstract</b>    | 1      | (a) Indicate the study’s design with a commonly used term in the title or the abstract                                                                                               | 2                  |
|                              |        | (b) Provide in the abstract an informative and balanced summary of what was done and what was found                                                                                  | 2-3                |
| <b>Introduction</b>          |        |                                                                                                                                                                                      |                    |
| Background/rationale         | 2      | Explain the scientific background and rationale for the investigation being reported                                                                                                 | 4                  |
| Objectives                   | 3      | State specific objectives, including any prespecified hypotheses                                                                                                                     | 4                  |
| <b>Methods</b>               |        |                                                                                                                                                                                      |                    |
| Study design                 | 4      | Present key elements of study design early in the paper                                                                                                                              | 5                  |
| Setting                      | 5      | Describe the setting, locations, and relevant dates, including periods of recruitment, exposure, follow-up, and data collection                                                      | 5                  |
| Participants                 | 6      | (a) Give the eligibility criteria, and the sources and methods of selection of participants. Describe methods of follow-up                                                           | 5                  |
|                              |        | (b) For matched studies, give matching criteria and number of exposed and unexposed                                                                                                  | N/A                |
| Variables                    | 7      | Clearly define all outcomes, exposures, predictors, potential confounders, and effect modifiers. Give diagnostic criteria, if applicable                                             | 5-6                |
| Data sources/<br>measurement | 8*     | For each variable of interest, give sources of data and details of methods of assessment (measurement). Describe comparability of assessment methods if there is more than one group | 5,7                |
| Bias                         | 9      | Describe any efforts to address potential sources of bias                                                                                                                            | 13                 |
| Study size                   | 10     | Explain how the study size was arrived at                                                                                                                                            | 7                  |
| Quantitative variables       | 11     | Explain how quantitative variables were handled in the analyses. If applicable, describe which groupings were chosen and why                                                         | 7                  |
| Statistical methods          | 12     | (a) Describe all statistical methods, including those used to control for confounding                                                                                                | 7                  |
|                              |        | (b) Describe any methods used to examine subgroups and interactions                                                                                                                  | N/A                |
|                              |        | (c) Explain how missing data were addressed                                                                                                                                          | N/A                |
|                              |        | (d) If applicable, explain how loss to follow-up was addressed                                                                                                                       | N/A                |
|                              |        | (e) Describe any sensitivity analyses                                                                                                                                                | N/A                |
| <b>Results</b>               |        |                                                                                                                                                                                      |                    |

|                          |     |                                                                                                                                                                                                              |       |
|--------------------------|-----|--------------------------------------------------------------------------------------------------------------------------------------------------------------------------------------------------------------|-------|
| Participants             | 13* | (a) Report numbers of individuals at each stage of study—eg numbers potentially eligible, examined for eligibility, confirmed eligible, included in the study, completing follow-up, and analysed            | 7     |
|                          |     | (b) Give reasons for non-participation at each stage                                                                                                                                                         | 7     |
|                          |     | (c) Consider use of a flow diagram                                                                                                                                                                           | N/A   |
| Descriptive data         | 14* | (a) Give characteristics of study participants (eg demographic, clinical, social) and information on exposures and potential confounders                                                                     | 7-8   |
|                          |     | (b) Indicate number of participants with missing data for each variable of interest                                                                                                                          | N/A   |
|                          |     | (c) Summarise follow-up time (eg, average and total amount)                                                                                                                                                  | 8     |
| Outcome data             | 15* | Report numbers of outcome events or summary measures over time                                                                                                                                               | 9-10  |
| Main results             | 16  | (a) Give unadjusted estimates and, if applicable, confounder-adjusted estimates and their precision (eg, 95% confidence interval). Make clear which confounders were adjusted for and why they were included | 10    |
|                          |     | (b) Report category boundaries when continuous variables were categorized                                                                                                                                    | 8     |
|                          |     | (c) If relevant, consider translating estimates of relative risk into absolute risk for a meaningful time period                                                                                             | N/A   |
| Other analyses           | 17  | Report other analyses done—eg analyses of subgroups and interactions, and sensitivity analyses                                                                                                               | 10-11 |
| <b>Discussion</b>        |     |                                                                                                                                                                                                              |       |
| Key results              | 18  | Summarise key results with reference to study objectives                                                                                                                                                     | 11    |
| <b>Limitations</b>       |     |                                                                                                                                                                                                              |       |
| Interpretation           | 20  | Give a cautious overall interpretation of results considering objectives, limitations, multiplicity of analyses, results from similar studies, and other relevant evidence                                   | 13    |
| Generalisability         | 21  | Discuss the generalisability (external validity) of the study results                                                                                                                                        | 12-13 |
| <b>Other information</b> |     |                                                                                                                                                                                                              |       |
| Funding                  | 22  | Give the source of funding and the role of the funders for the present study and, if applicable, for the original study on which the present article is based                                                | 14    |

\*Give information separately for cases and controls in case-control studies and, if applicable, for exposed and unexposed groups in cohort and cross-sectional studies.

**Note:** An Explanation and Elaboration article discusses each checklist item and gives methodological background and published examples of transparent reporting. The STROBE checklist is best used in conjunction with this article (freely available on the Web sites of PLoS Medicine at <http://www.plosmedicine.org/>, Annals of Internal Medicine at <http://www.annals.org/>, and Epidemiology at <http://www.epidem.com/>). Information on the STROBE Initiative is available at [www.strobe-statement.org](http://www.strobe-statement.org).
