# Supplementary material for: Effects on renal outcome of concomitant acute pyelonephritis, acute kidney injury and obstruction duration in obstructive uropathy by urolithiasis: a retrospective cohort study
Source: PubMed Central journal article supplement — BMJ Open. 2019 Nov 3;9(11):e030438. doi: 10.1136/bmjopen-2019-030438 (PMC6858199; doi:10.1136/bmjopen-2019-030438), 2019-11-03
Supplement: bmjopen-2019-030438supp001.pdf [file bmjopen-2019-030438supp001.pdf]

Table S1. Primary or secondary diagnosis of patients included in the screening list

| International Classification of Diseases-10 Codes | International Classification of Diseases-10 Diagnosis |
|---------------------------------------------------|-------------------------------------------------------|
| N200                                              | Calculus of kidney                                    |
| N200.01                                           | Nephrolithiasis, NOS                                  |
| N200.02                                           | Renal calculus or stone                               |
| N200.03                                           | Staghorn Calculus                                     |
| N200.04                                           | Stone in kidney                                       |
| N201                                              | Calculus of ureter                                    |
| N201.01                                           | Ureteric stone                                        |
| N201.02                                           | UPJ (ureteropelvic junction) stone                    |
| N201.03                                           | UVJ (ureterovesical junction) stone                   |
| N202                                              | Calculus of kidney with calculus of ureter            |
| N209                                              | Urinary calculus, unspecified                         |
| N209.01                                           | Calculous pyelonephritis                              |
| N210                                              | Calculus in bladder                                   |
| N210.02                                           | Urinary bladder stone                                 |
| N211                                              | Calculus in urethra                                   |
| N218                                              | Other lower urinary tract calculus                    |
| N219                                              | Calculus of lower urinary tract, unspecified          |
